# Supplementary material for: Genome-wide identification, Characterization, and Expression Analysis of the CsBAG family in Citrus sinensis (L.) Osbeck
Source: Research Square preprint supplement (doi:10.21203/rs.3.rs-4348725/v1), 2024-05-13
Supplement: Supplementary file 1 [file 49388180ebbc55a679bb0083.xlsx]

## Sheet: Table S1
Table S1 All primers used for the qRT-PCR experiment.
Primer	Sequence (5’-3’)
qCsBAG1-F1(273bp)	CATCAACCACCACAGTCACCTACAC
qCsBAG1-R1(273bp)	GCTTCTCACGCTCATCACTCCTG
qCsBAG2-F1(209bp)	CATTGATTGAGATGCTCATGCGACAAG
qCsBAG2-R1(209bp)	GTGAACTGTGGACGGAGGAGGAT
qCsBAG3-F1(240bp)	AAGTGAGGAGTGATGATGAAGTATGC
qCsBAG3-R1(240bp)	CGTCCATTCTGCTGTCTATGTCAAT
qCsBAG4.1/3-F1(154bp)	CGAGAAAGACGGTGCCTTGAGAT
qCsBAG4.1/3-R1(154bp)	TGTCATCTGTCAGTTCCACTCCTCT
qCsBAG4.2-F1(201bp)	GAGGAGTGGAACTGACAGATGACAA
qCsBAG4.2-R1(201bp)	CTTCGCCTGATTTGCTGCTGAG
qCsBAG5-F1(195bp)	GCGAGGAATTAGATACATCAGCAGAGTT
qCsBAG5-R1(195bp)	CCACCTTTATAGCGTTACTACTGTCACA
qCsBAG6-F1(126bp)	CTGTTAGAGGCGTTGATTCTGGAGTTA
qCsBAG6-R1(126bp)	CACCGTTCTGATCGTTCCTGCTATT
qCsBAG7-F1(114bp)	ATTCGTAGGTCTCAGGCTCTTCGT
qCsBAG7-R1(114bp)	TCGGCTCACTATCTGGCGGTAG
qCsBAG8-F1(1143bp)	AGCAGCAACAACAACAACAACAACA
qCsBAG8-R1(1143bp)	GGCAGGATTGAATGTGGATGTGGAT
qCsACTIN-F1(135bp)	CAGAAGGATGCCTATGTTGGTGATGA
qCsACTIN-R1(135bp)	CTCGTTGTAGAAGGTATGATGCCAGAT

## Sheet: Table S2
Table S2 Secondary structure of the BAG proteins
Protein Name	Alpha Helix	Extended Strand	Beta Turn	Random Coil
CsBAG1	56.88	9.17	5.5	28.44
CsBAG2	45.88	14.12	6.27	33.73
CsBAG3	54.42	9.46	5.89	30.23
CsBAG4.1	40.83	20.18	8.72	30.28
CsBAG4.2	37.28	16.38	5.23	41.11
CsBAG4.3	40.83	20.18	8.72	30.28
CsBAG5	38.46	13.29	6.29	41.96
CsBAG6	61.94	1.84	2.36	33.86
CsBAG7	52.51	9.3	2.51	35.68
CsBAG8	32.68	12.11	3.38	51.83

## Sheet: Table S3
Table S3 Protein, CDS and genomic sequences of Oryza sativa, Malus domestica, Arabidopsis thaliana, Solanum lycopersicum and Carica papaya
Oryza sativa	Phytozome ID	chromosome	Protein Name	Start Sit	End Sit	No. of Exons (bp)	Gene sequence (bp)	CDS (bp)	Protein sequence (bp)
	LOC_Os01g61500.1	Chr1	OsBAG1.1	35582262	35585727	4	GGCCTCGCGAGAATCCAAAGTTGTACTTGGCGAAAAAAAAAAAACAGCTCTCGCAAAATCTCGCTGCCGCTGCCGCTCGCGAGCAAGCTCTACCGCCACTGCCGCGCGGCTGTTCTTGCTTCTCCGGAGGGGAAGGAACCCCGCGGGGAGGGAGCCTTCCACCCTTCGCAAAAGCCACGCGCCACCAAATCCTCCTTTTCTCCTCATCTTCCCTCCATCCCTTCCTCCCTCCGGCCGCGCGTCGCTTTCGCCGCGACCGAATCGGTGGGGTCGTGTGGGGGGAGGAGAGGGGCGCCATAAAGGCGGCTGGGGTCGGCGATGATGAGCGGCGTTGGAGGAGGCAGATCGGGCGGGAGGGACGCGGAGGGCGAGTGGGAGGTCCGGCCTGGCGGGATGCTG…	ATGATGAGCGGCGTTGGAGGAGGCAGATCGGGCGGGAGGGACGCGGAGGGCGAGTGGGAGGTCCGGCCTGGCGGGATGCTGGTGCAGCGCAGGGACGGCGACACGGGTCCGGCCGTCAGGCTCAGGGTCTCCCACGGCGCCTCCTTCCGCGACGTCGCCGTGCCGGCGCACTCCACCTTCGGTGAATTGAAGGGGGTCCTTACCCAGGCAACTGGCGTAGAGCCTGAAAGGCAGAGGCTCTTCTTCCGTGGGAAGGAGAAGAGTGACAATGAGTTCCTGCATACAGCTGGGGTCAAGGATGGAGCAAAACTTCTTCTACTTGAGAAGCCTGCCCCTGCCAATGTAGAGCAGAGGGCCGAGCCAGTAATTATGGATGAGAGCATGATGAAGGCTTGTGAG…	MMSGVGGGRSGGRDAEGEWEVRPGGMLVQRRDGDTGPAVRLRVSHGASFRDVAVPAHSTFGELKGVLTQATGVEPERQRLFFRGKEKSDNEFLHTAGVKDGAKLLLLEKPAPANVEQRAEPVIMDESMMKACEAVGRVRAEVDRLSAKVCDLEKSVFAGRKIEDKDFVVLTELLMMELLKLDGIEAEGEARAQRKAEVRRVQGLVETLDKLKARNANPFSDQNKSVSVTTQWETFDNGMGSLNAPPPRVSSTQINTDWEQFD
	LOC_Os01g61500.2	Chr1	OsBAG1.2	35582262	35585727	4	GGCCTCGCGAGAATCCAAAGTTGTACTTGGCGAAAAAAAAAAAACAGCTCTCGCAAAATCTCGCTGCCGCTGCCGCTCGCGAGCAAGCTCTACCGCCACTGCCGCGCGGCTGTTCTTGCTTCTCCGGAGGGGAAGGAACCCCGCGGGGAGGGAGCCTTCCACCCTTCGCAAAAGCCACGCGCCACCAAATCCTCCTTTTCTCCTCATCTTCCCTCCATCCCTTCCTCCCTCCGGCCGCGCGTCGCTTTCGCCGCGACCGAATCGGTGGGGTCGTGTGGGGGGAGGAGAGGGGCGCCATAAAGGCGGCTGGGGTCGGCGATGATGAGCGGCGTTGGAGGAGGCAGATCGGGCGGGAGGGACGCGGAGGGCGAGTGGGAGGTCCGGCCTGGCGGGATGCTG…	ATGGAAGCTCAATGTTATATAGTTCAACGTTTGAAAGAAGCCTTCTCTTATCGAATTTTTGGAGTAGTTCGCAGAAGCAGTGAATTGAAGGGGGTCCTTACCCAGGCAACTGGCGTAGAGCCTGAAAGGCAGAGGCTCTTCTTCCGTGGGAAGGAGAAGAGTGACAATGAGTTCCTGCATACAGCTGGGGTCAAGGATGGAGCAAAACTTCTTCTACTTGAGAAGCCTGCCCCTGCCAATGTAGAGCAGAGGGCCGAGCCAGTAATTATGGATGAGAGCATGATGAAGGCTTGTGAGGCTGTTGGCCGTGTAAGAGCTGAAGTTGACAGACTCTCTGCCAAGGTATGTGATTTGGAGAAGAGTGTGTTTGCAGGGAGAAAGATTGAGGATAAAGATTTT…	MEAQCYIVQRLKEAFSYRIFGVVRRSSELKGVLTQATGVEPERQRLFFRGKEKSDNEFLHTAGVKDGAKLLLLEKPAPANVEQRAEPVIMDESMMKACEAVGRVRAEVDRLSAKVCDLEKSVFAGRKIEDKDFVVLTELLMMELLKLDGIEAEGEARAQRKAEVRRVQGLVETLDKLKARNANPFSDQNKSVSVTTQWETFDNGMGSLNAPPPRVSSTQINTDWEQFD
	LOC_Os02g48780.1	Chr2	OsBAG2	29853570	29854458	1	AATGAAAGCACACGCCCCCGTCTTTTCCCAAAGACGCGAGCTCGCCGCTGCGCAGCATCCAGATTCCAGATAGTACTATTGGCAAAGCACAGGTTTGGGGCGCCATGGGCTCCTACCACTACACCTCCACCTCCCACTTCTTCTTCGCCGGCGGCGGCGAGGGGGAGTACTCCAGCTACAAGGGTACTGGTAGCACCGACACCCACAGGCCCACCACCGTGCGGATCCCGGTTACCACCCCGGGCCCGGAGCGGCCGCCGGACGACGCGGCGGCGGCCAGGATCCAGGCCGCGTTCCGGGGGCACCTGGTGAGGAGGCACGCCGCGGCCGTCCGCGGCGCCGACGACGAGGCGACGCGGCTGGAGCGGCTGCTCCGGAGGCAGGAGACAGTGGACGCCG…	ATGGGCTCCTACCACTACACCTCCACCTCCCACTTCTTCTTCGCCGGCGGCGGCGAGGGGGAGTACTCCAGCTACAAGGGTACTGGTAGCACCGACACCCACAGGCCCACCACCGTGCGGATCCCGGTTACCACCCCGGGCCCGGAGCGGCCGCCGGACGACGCGGCGGCGGCCAGGATCCAGGCCGCGTTCCGGGGGCACCTGGTGAGGAGGCACGCCGCGGCCGTCCGCGGCGCCGACGACGAGGCGACGCGGCTGGAGCGGCTGCTCCGGAGGCAGGAGACAGTGGACGCCGTCCGCGGCGACGAGCGCGAGCGGGCGCGGTTCTCGGAGGCGCTCATGGCCGTGCTGCTCCGCCTCGACGCCGTCCCGGGGTACTACCCGGCCGTGCGGGAGGCG…	MGSYHYTSTSHFFFAGGGEGEYSSYKGTGSTDTHRPTTVRIPVTTPGPERPPDDAAAARIQAAFRGHLVRRHAAAVRGADDEATRLERLLRRQETVDAVRGDERERARFSEALMAVLLRLDAVPGYYPAVREARRAVTRRVVGLQEVFDAVLAAPDAADTCGVPASLDQVLEGIWGESPAAPPPPPPPPPPAAVEVEEEVVRSPCWRRFFGGV
	LOC_Os04g52890.1	Chr4	OsBAG3.1	31497253	31502769	4	AAGAAAGCCAAAGACAAAGCGATCGATCGGAGAACGAACGAACGAAGCGCGTCGCGTCCCACTCCTCCCCTCCTCCTCCTCCGCCGCGAGCGCGCGCACGCGCGTGCAGCCTCCGCCTCCTCCCTCACGCCACCACCACCACCACCTCGCGCGCGCGCGCACTACTGCACCAAACCCCCCGCACTAAGTGGTTGTGTTCTTGTTGGCGAGGAGGAGAGAGGGGTGGGGTTTGTGGTGTCGTCGTCCATGGCGGCGGTGATGCACCGGTCGAGCTCGGATGGCGGGTCGAGCAGCGGGTGGTCGGAGGCGGCGGCGGCGTCGGCGGCCGGGGACGAGAGGGCCGGGTGGGAGGTGCGCCCGAGCGGGATGGTCGTGCAGGCGCGCGAGGAGGGCCCCGGC…	ATGGCGGCGGTGATGCACCGGTCGAGCTCGGATGGCGGGTCGAGCAGCGGGTGGTCGGAGGCGGCGGCGGCGTCGGCGGCCGGGGACGAGAGGGCCGGGTGGGAGGTGCGCCCGAGCGGGATGGTCGTGCAGGCGCGCGAGGAGGGCCCCGGCGGTGGCGGCGGCGGAGGAGGAGGGATGGGGATCCCGCCGAGGCCTCCGCCGCCGGAGATCAAGGTGCGGGTCAAGTACGGCGCCGCGCGGCACGAGGTCGCCGTCTCCTCCATTGCCTCCTTCGGCGAGCTGAAGAAGCTGCTGGCGGCGAGGACCGGGCTGCCGGCGGCGGACCAGCGGCTGACGTACAGGGGCAAGGAGCGGGGCAACGCCGACTACCTCGACGTCTGCGGCGTCAAGAACAGG…	MAAVMHRSSSDGGSSSGWSEAAAASAAGDERAGWEVRPSGMVVQAREEGPGGGGGGGGGMGIPPRPPPPEIKVRVKYGAARHEVAVSSIASFGELKKLLAARTGLPAADQRLTYRGKERGNADYLDVCGVKNRSKLYLAEDPTSVERRYIERQKSAKIETANRAIGAIALEVDKLADQVRSIEKSITRGSKVAEVQITTLIELLMRLAVKLDSIHAEGDSSSQKNIQAKRVQKCVETLDVLKISNARLQNVIVTTKWETFDAPATTQWELFD
	LOC_Os04g52890.2	Chr4	OsBAG3.2	31497253	31502769	4	AAGAAAGCCAAAGACAAAGCGATCGATCGGAGAACGAACGAACGAAGCGCGTCGCGTCCCACTCCTCCCCTCCTCCTCCTCCGCCGCGAGCGCGCGCACGCGCGTGCAGCCTCCGCCTCCTCCCTCACGCCACCACCACCACCACCTCGCGCGCGCGCGCACTACTGCACCAAACCCCCCGCACTAAGTGGTTGTGTTCTTGTTGGCGAGGAGGAGAGAGGGGTGGGGTTTGTGGTGTCGTCGTCCATGGCGGCGGTGATGCACCGGTCGAGCTCGGATGGCGGGTCGAGCAGCGGGTGGTCGGAGGCGGCGGCGGCGTCGGCGGCCGGGGACGAGAGGGCCGGGTGGGAGGTGCGCCCGAGCGGGATGGTCGTGCAGGCGCGCGAGGAGGGCCCCGGC…	ATGGCGGCGGTGATGCACCGGTCGAGCTCGGATGGCGGGTCGAGCAGCGGGTGGTCGGAGGCGGCGGCGGCGTCGGCGGCCGGGGACGAGAGGGCCGGGTGGGAGGTGCGCCCGAGCGGGATGGTCGTGCAGGCGCGCGAGGAGGGCCCCGGCGGTGGCGGCGGCGGAGGAGGAGGGATGGGGATCCCGCCGAGGCCTCCGCCGCCGGAGATCAAGGTGCGGGTCAAGTACGGCGCCGCGCGGCACGAGGTCGCCGTCTCCTCCATTGCCTCCTTCGGCGAGCTGAAGAAGCTGCTGGCGGCGAGGACCGGGCTGCCGGCGGCGGACCAGCGGCTGACGTACAGGGGCAAGGAGCGGGGCAACGCCGACTACCTCGACGTCTGCGGCGTCAAGAACAGG…	MAAVMHRSSSDGGSSSGWSEAAAASAAGDERAGWEVRPSGMVVQAREEGPGGGGGGGGGMGIPPRPPPPEIKVRVKYGAARHEVAVSSIASFGELKKLLAARTGLPAADQRLTYRGKERGNADYLDVCGVKNRSKLYLAEDPTSVERRYIERQKSAKIETANRAIGAIALEVDKLADQVRSIEKSITRGSKVAEVQITTLIELLMRLAVKLDSIHAEGDSSSQKNIQRVQKCVETLDVLKISNARLQNVIVTTKWETFDAPATTQWELFD
	LOC_Os05g43670.1	Chr5	OsBAG4	25390731	25392521	2	ACTCTCCCTTTCCCTTCCCCCCTCTCCCCTCCGCTCCCCGATGTGATTTTCCCCGCCGCCGCTGCCGCCGCGCCGATCTGATCCGCAGAAATGCCTCGTCACCACCACCACGACCCGCCTCCGCCTCCGCCCGCCTGCTGCTCCTGCTGCTGCGGCTGCGACGGCGGCTGCTACCCCGCGCCGACCAGCTACTACTACCCCGTGCCGCCCCCGCCCCCGCCCGCGCCAACCTCCGCCTCCGACCACCTCCTCCACGCCATCGCGGCCCATCTCCTCCTCGGCTCCGCGCCCCCGCCCCCGGCCCCGACTCCCCCGCAGCCGCAGACCCAGCCTCCGCCGCCGCCGCCGCCGCCGCCCACCTCCGCGGCGCACCACGCGTACCACTACCAGTACCAGTAC…	ATGCCTCGTCACCACCACCACGACCCGCCTCCGCCTCCGCCCGCCTGCTGCTCCTGCTGCTGCGGCTGCGACGGCGGCTGCTACCCCGCGCCGACCAGCTACTACTACCCCGTGCCGCCCCCGCCCCCGCCCGCGCCAACCTCCGCCTCCGACCACCTCCTCCACGCCATCGCGGCCCATCTCCTCCTCGGCTCCGCGCCCCCGCCCCCGGCCCCGACTCCCCCGCAGCCGCAGACCCAGCCTCCGCCGCCGCCGCCGCCGCCGCCCACCTCCGCGGCGCACCACGCGTACCACTACCAGTACCAGTACCAGTACGAGCAGCCCAAACCCCATCAGTATCCGCAGCCGCAGCAGGCCAACCCGTCGGACCACAGCCACGCCGTGCTCCACTCGCTCCTG…	MPRHHHHDPPPPPPACCSCCCGCDGGCYPAPTSYYYPVPPPPPPAPTSASDHLLHAIAAHLLLGSAPPPPAPTPPQPQTQPPPPPPPPPTSAAHHAYHYQYQYQYEQPKPHQYPQPQQANPSDHSHAVLHSLLRRVAALESTLPRCFASPPVPPPLHRNPRHRPRAAAHREEEDDEEEEDDDEDAPASLPPPPRRARAPPSPARERAARTIQAHFRRFLARRSRTLRHLKELAVLRSKAAALRGSLSGRGRVGDPAAISEAAMALLFHLDSIQGGDPMIREGKRAVSRELTRILEFVDKVLVKEHGEMAMNGELDCKDYHEGCNAAFAANPSAMNKKKVGFCGNGKVQELHDEAEQEHGSDADESSETSSSAEAEARKRSNSKRGAHAKPGLAAPMPVY…
	LOC_Os06g03640.1	Chr6	OsBAG5	1414220	1416618	4	GTTCCCTCATCAACCTCACCACCATTATTTTCTTCTCTCCTCTTCTCTTCTTCCTCCTCTCCTCTCCTCTCCTCGCTCTCCATCCATCTCGTCTTCTTCTTCCTCCTCCTCAGCTTCGAGATTTCAGCTTCTCCAAACCCCCATTCTTCCCGCCACAAGCTCTGCTCTGTGCTTTGCTCGCTCGCCTTTCCCGCCATTGGTGTGCTTCGCTTTCTTGGCTTCAAAGATCCGACGAGCTCTGTGATAGCTGGGGAGAAGAAGAGGAGGAGAGGAGGATGCTGGGAGCGAGCCCTAAGGCCAAGAAAGGCGCGACGGTGAAGTTCGGGTCGATGAAGAATCCTCCTCCTCCCCCGGTGGTTGGCGCCGCCGCCGGAGCAGCGGCGGCGGCGGCGGGTGGGA…	ATGCTGGGAGCGAGCCCTAAGGCCAAGAAAGGCGCGACGGTGAAGTTCGGGTCGATGAAGAATCCTCCTCCTCCCCCGGTGGTTGGCGCCGCCGCCGGAGCAGCGGCGGCGGCGGCGGGTGGGAAGGTGCCGGCGGAGGAGGTGTGGGAGGTGCGGCCAGGCGGGATGCTGGTGCAGAAGAGGGGCGGCGGCGCCGACGAGGAGCCCGTCAACGTGAAGCCGGTGCCCACCATCCGCGTCAAGGTCAAGCACGCCGGCATCACCCACGAGATCTACATCAACTCGCAGGCGTCCTTCGGGGAGCTGAAGAAGATGGTGGCGGCGCGAACGGGGCTGCATCCGGACGACCAGAAGGTGATGTACAAGGACAAGGAGAGGGACTCCAAGGCGTTCCTGGAC…	MLGASPKAKKGATVKFGSMKNPPPPPVVGAAAGAAAAAAGGKVPAEEVWEVRPGGMLVQKRGGGADEEPVNVKPVPTIRVKVKHAGITHEIYINSQASFGELKKMVAARTGLHPDDQKVMYKDKERDSKAFLDMAGVKDRSKLVVVEDPEARARRLIEERRNGHLEKAAKAVAAVTAEVDKLAPKVAALDASVRKGEKVAENDVVQVTELLMNELLKLDAVVADGDVKAQRRLQVKRVQKYVETLDAVMAKNAAIVRKSGEKLTSKQHHHPPARQQQQQAHQHHQQPAAGQTRWEMFDLLSSLPSTSSASSTTTVSSTASSGAPPPLPPPANRLDWMLF
	LOC_Os08g43270.1	Chr8	OsBAG6	27357414	27359108	2	GGCCTCGCGAGAATCCAAAGTTGTACTTGGCGAAAAAAAAAAAACAGCTCTCGCAAAATCTCGCTGCCGCTGCCGCTCGCGAGCAAGCTCTACCGCCACTGCCGCGCGGCTGTTCTTGCTTCTCCGGAGGGGAAGGAACCCCGCGGGGAGGGAGCCTTCCACCCTTCGCAAAAGCCACGCGCCACCAAATCCTCCTTTTCTCCTCATCTTCCCTCCATCCCTTCCTCCCTCCGGCCGCGCGTCGCTTTCGCCGCGACCGAATCGGTGGGGTCGTGTGGGGGGAGGAGAGGGGCGCCATAAAGGCGGCTGGGGTCGGCGATGATGAGCGGCGTTGGAGGAGGCAGATCGGGCGGGAGGGACGCGGAGGGCGAGTGGGAGGTCCGGCCTGGCGGGATGCTG…	ATGATGAGCGGCGTTGGAGGAGGCAGATCGGGCGGGAGGGACGCGGAGGGCGAGTGGGAGGTCCGGCCTGGCGGGATGCTGGTGCAGCGCAGGGACGGCGACACGGGTCCGGCCGTCAGGCTCAGGGTCTCCCACGGCGCCTCCTTCCGCGACGTCGCCGTGCCGGCGCACTCCACCTTCGGTGAATTGAAGGGGGTCCTTACCCAGGCAACTGGCGTAGAGCCTGAAAGGCAGAGGCTCTTCTTCCGTGGGAAGGAGAAGAGTGACAATGAGTTCCTGCATACAGCTGGGGTCAAGGATGGAGCAAAACTTCTTCTACTTGAGAAGCCTGCCCCTGCCAATGTAGAGCAGAGGGCCGAGCCAGTAATTATGGATGAGAGCATGATGAAGGCTTGTGAG…	MMSGVGGGRSGGRDAEGEWEVRPGGMLVQRRDGDTGPAVRLRVSHGASFRDVAVPAHSTFGELKGVLTQATGVEPERQRLFFRGKEKSDNEFLHTAGVKDGAKLLLLEKPAPANVEQRAEPVIMDESMMKACEAVGRVRAEVDRLSAKVCDLEKSVFAGRKIEDKDFVVLTELLMMELLKLDGIEAEGEARAQRKAEVRRVQGLVETLDKLKARNANPFSDQNKSVSVTTQWETFDNGMGSLNAPPPRVSSTQINTDWEQFD
	LOC_Os09g35630.1	Chr9	OsBAG7	20494053	20496911	4	GAGCGATGGTGGAAGTGGCAAGTTTGGCCGAGACGAGACGACACGACGGTTGCTTCCTTCCTAACCAACTCCCCAACCAAGCCTCCCTCCCTCGCCGGAGCTCTCGCCACCCCGCGGCCGCCGCCGCCGCCGCGAAACGGAGCATTTGGTTAATTGCATTGCGTCCGCGTTGGGTTTGCGTTGCATGGTCACGCGCGCGCACGCACGCACGCGGCTTTGGGTTTTTTTTGGCGCATAAATATTCCGCGGCTGCTGCTGCTGCTGCCGCTTCCTGCCTGTCCCTGAGTTGTACCCGCTCTATTTTTTTTTTCTCTCTCTTTCTTCTCCATCTCTCCTCCTTCCTTCCTAACCTCTCCCCACCTACCTCCCTGCCGCCTGATCCTGATTTCCCCAATTGAG…	ATGATGCGCGCCAAGGCGAAAGGTACATTCCCACCGGCGGCGGCGGCGATGAAGGAGAGCTCTGCTCCTCCGCCGCCTGCTGCTGCGGCGGCGGCGGCGAGGGAGGATGAGTGGGAGGTGCGGCCAGGTGGGATGCTGGTGCAGAAGAGGAGCCCGGACGGCGACGCCCCGGCCGCGCCCGTGCCCACCATCCGCGTCAAGGTCAAGTTCAACGGCGTCTACCACGAGATCTACATCAACTCGCAGGCGTCCTTCGGTGAGCTGAAGAAGCAGCTGTCGGCGCCGACGGGGCTGCACCCGGAGGACCAGAAGATCGTTTACAAGGACAAGGAGAGGGACTCCAAGGCGTTCCTCGACATGGCCGGCGTCAAGGACCGCTCCAAGATGGTGCTCCTCGAG…	MMRAKAKGTFPPAAAAMKESSAPPPPAAAAAAAREDEWEVRPGGMLVQKRSPDGDAPAAPVPTIRVKVKFNGVYHEIYINSQASFGELKKQLSAPTGLHPEDQKIVYKDKERDSKAFLDMAGVKDRSKMVLLEDPTAQAKRLLEQRRTDKAERAAKSISRISLDVDKLATKVTALEAIVGKGGRVVDADVVTLTEALMNELVKLDAIAAEGEVKVQRRMQEKRVQKYVESLDAIRAKNAASHNKASGNGHAKPRAPHLPPPVSQRRQFQAPPPAAPTTTKTAAAPAPPPTASWESFDLLSSMPSTSSSTVTTTMAAATTTTTTSPIPRFDWELF
	LOC_Os11g31060.1	Chr11	OsBAG8	18070198	18071815	1	ACTATCGCAACAAAATTCAGATCAGGCGAATCGAAAAAGGGCAAGAGAAGCTCGGAGATCGCATCAATGGCGTCGTCGTCTCGTCGATTCTTCGGCTACGACCCCTACGACTACTACTACACCTCCTCCCCCTACGACTACGCCTACCCGTACTACACCCCCGCCCCCGCCGCCACCGACCGCCGCCGCCACGCCTCGCCGCGGTTCTTCCCGGCGGCGGCGGCCGATGAGGAGTACAGGTACGGCGAGCCGGTGGAGACGGTGGACGTGCTGCGCCCGAGCTCCTCGAGGAGGAGCAGGGCGAGGCCGGTGTCCGTGTCCGTCCCGGTGCAGTTTGCTGGGTCTGAGACGAAGGCGAAGGCGAAGGGGTGTGAGAGTGAGATGAGTCCGCCGCGATCG…	ATGGCGTCGTCGTCTCGTCGATTCTTCGGCTACGACCCCTACGACTACTACTACACCTCCTCCCCCTACGACTACGCCTACCCGTACTACACCCCCGCCCCCGCCGCCACCGACCGCCGCCGCCACGCCTCGCCGCGGTTCTTCCCGGCGGCGGCGGCCGATGAGGAGTACAGGTACGGCGAGCCGGTGGAGACGGTGGACGTGCTGCGCCCGAGCTCCTCGAGGAGGAGCAGGGCGAGGCCGGTGTCCGTGTCCGTCCCGGTGCAGTTTGCTGGGTCTGAGACGAAGGCGAAGGCGAAGGGGTGTGAGAGTGAGATGAGTCCGCCGCGATCGGTGGCGAGGATTGGGAGGGAGGCGGCGGCGGTGAGGGTGCAGGCGGCGGCGAGGGGGTTCCTGGCG…	MASSSRRFFGYDPYDYYYTSSPYDYAYPYYTPAPAATDRRRHASPRFFPAAAADEEYRYGEPVETVDVLRPSSSRRSRARPVSVSVPVQFAGSETKAKAKGCESEMSPPRSVARIGREAAAVRVQAAARGFLARRMVREVRAVEAEAEGVARKVAAEAEALRRDARGRVALGEALMRLLLRLDAVHGAREYRRRVTKRVLALQDAVDALEHVPAAPPVEEEEEEARVVADDAAPALDMEEAHDAQEDMMTPSPAQDASQLADDAPAAVDAVDMEENEMAPGSPRAEEEHGVEAEPKPEVEIPVPEAGTEMEVDGGQATGGEAETEKAVEQVVGGEMQEAEEEAEGEWEMVTAESPLEAAAADDDVEAVESSAAPAARVDEPAVQDEEKEKEEGVEMKKV…
Malus domestica	MD01G1196900	Chr01	MdBAG2	29500219	29502393	4	TGAATGAGTTGTTCGTTTATTTCTTTCTCAAGACACCATTAAAGCTGCGGCTTTTCAGCGGTTGGTGTGATGCTGCTGGGGTCAGAGCGTGAGAATTCTGAAACCAGGGTTTTCTTCTACAAGCCTTTCTCTCAATTGGGTTGTTTCTAATTTTTGAAGCAGATAAAAAATCTGAGAGATCTCTCGTGGAAAACTAGAGAGTAAAAATGATGAGGATGAAGACGAAGACTACAGGGGTGTCACTGGCCGAGTTGAATGGAAGTTCGGGCGGCGGAGGAGCTGAGTCGGGGCAGGGAGAGTGGGAGCTCAGACCGGGAGGAATGCTGGTTCAGAAGCGAAATCCGGACTCTGATCGGAACTCGGCGCCTCCACCGACAATTAGAGTTCGGGTCAAATATG…	ATGATGAGGATGAAGACGAAGACTACAGGGGTGTCACTGGCCGAGTTGAATGGAAGTTCGGGCGGCGGAGGAGCTGAGTCGGGGCAGGGAGAGTGGGAGCTCAGACCGGGAGGAATGCTGGTTCAGAAGCGAAATCCGGACTCTGATCGGAACTCGGCGCCTCCACCGACAATTAGAGTTCGGGTCAAATATGGGTCCATTTACCATGAAATGAGCATCAGTGCTCAGTCTTCTTTTGGGGATTTGAAGAAAATGTTGGTTGGACCGACAGGTTTGCACCATGAAGATCAGAAATTGATATTCAAAGACAAGGAGAGGGACTCGAAGGCGTTTCTTGACATGTCCGGGGTGAAGGACCGGTCGAAAATGGTGTTAGTTGAGGACCCTATTAGCCAAGAA…	MMRMKTKTTGVSLAELNGSSGGGGAESGQGEWELRPGGMLVQKRNPDSDRNSAPPPTIRVRVKYGSIYHEMSISAQSSFGDLKKMLVGPTGLHHEDQKLIFKDKERDSKAFLDMSGVKDRSKMVLVEDPISQEKRYLEMRRNAKMEKASKSISEISLEVDRLAGQVSALESIITKGKKVAEQDVLVLIEQLMNQLLKLDGIMGDGDVKLQRKMQVKRVQKYVETLDVLKAKNSSPSSNGSQIPKQVQQRHSDGHSNGNGHRLAPIQEHQPRNSVDYPPTHNQQVQQQEQPSRHSASGPVVVTTQWETFDSAPALIPTSSTSKAANQSPYPKFNWESFE
	MD01G1073600	Chr01	MdBAG1	17913619	17918552	2	CGAACTGCACGTTGTTAGAAACCTCCAGAAAACTCCAGCGTTGGATGTCGCGGGAAACATCTCGAAACACCAAGCCTCGGATTTTTCCCGTTGATTTGCATTTCTAGCCTTTCCTATATATTGCTCGACTCCTTTCTCCCCAAAACACAGATTTTGAATTTCAGAAAGCGAAAGCCGAAAGAAAACCAGACTACAAAAGCTTCCATTTTTCTAATTTTCGGGTTTGTGGACCGATTCGCTCCGATAACTTTGTCATCCGGATTGTGGAACCGCAATTGGCTGTTTGAATTTTCTCGAGAAAATAAACTGTAAGTTCTTCCTCTCTTCTTTCTTCTCCTTGTGATTTTGCGTTTTCCTTTGTTTCTGCAATGATGTGAGATTATCTGAGAGAAGATTTAG…	ATGATGCCATTATACAGATACATGGATTCAAACCCCTACCAAAGAAACCAAACTTTCTCTTACCCTCAGTATCATAATCCGGGTTTCGGGTCCAATCCGTCCATGGTATGTGAGCCTTGGCCCTGTGGCGGAAACTATGGCTACCCAATGCCTTGCCATTCTTGCTATAACCATAATTTCAGACCCTCTTACCCTCATCCTTCAATGCCATCACCGCAACACTTCTATGGGGGTTATCCTGTTCCGCATCACGAGGCCTACCCTGTTCCATATGTGCCGCCGCCTCCTCATTATTCCATGGAGATTCCTAAATATGAGTATGATAAGATGGTACCTCGAAATTATCACTGTTTTGGGTGTCCTAATCATGTTTGCCACCAGAATGTAGATAAGGGTGTG…	MMPLYRYMDSNPYQRNQTFSYPQYHNPGFGSNPSMVCEPWPCGGNYGYPMPCHSCYNHNFRPSYPHPSMPSPQHFYGGYPVPHHEAYPVPYVPPPPHYSMEIPKYEYDKMVPRNYHCFGCPNHVCHQNVDKGVKIEEQGSDVVDKKADLVPVHMNNNHYPTLWFPPDSLNGREQRKVSEPEVVEETKIPTDSKPTEGLKSQGDQRHIRFPFDLNDIGASMQGGNREPRQEQQVEDKKKEFPFPIFWMPPYQEAGKKDKNVNASRDHKTEDEHKQIPFPFFWFPYGNKQEEVRKEDNREVNSAPKIVPMKITGGGVTMEAGTNEEKPAGQGAEERKENTANVKSIVVKQMDPRKEENNSEDEERRERSVPVKQVEENVGNKPSGTSVKRQSSSPKKSSEL…
	MD03G1063900	Chr03	MdBAG3	5119247	5121596	4	TGTCTTCAAGTGCATTTTCTTTGCTTACTCAACCCTCCAAGACATCACACACTCACCTCTCTCTCTCTCTCTCTCAACCATTCCACCTTCTCCATTTTTTCCATAATTTTATGATCCTCTCAGACAAATAGAATGAAAAAAAGATCAAGAGTTGGTGTGGGGAATGATGGGTTAAATAGGAAGATAGATTGGGAGCTGAGGCCTGGTGGAATGCTTGTTCAAAAGAGAGACACTGGGGATGCCAATTCTGGGATTATGATCAAGATCAAGGTTTCTCATGGTTCTTATTACCATGATCTCATTGTCCATGCTCAATCCACTTTTGGTAAATCTTCTCATTAACCTGATTTAATTTACTTTCTGGGTTCTTCTTGTTTTCCTCATAATTTTTCTGATGAG…	ATGAAAAAAAGATCAAGAGTTGGTGTGGGGAATGATGGGTTAAATAGGAAGATAGATTGGGAGCTGAGGCCTGGTGGAATGCTTGTTCAAAAGAGAGACACTGGGGATGCCAATTCTGGGATTATGATCAAGATCAAGGTTTCTCATGGTTCTTATTACCATGATCTCATTGTCCATGCTCAATCCACTTTTGGTGATCTGAAAAGAGTTCTTGCCCATGACACTGGTTTGGAGCCAAAGGAGCAAAGATTGTTGTTCAGAGGGAAAGAGAAGGAAGATAATGAATGTCTGCACATTGCTGGCGTGAAAGATATGTCGAAGATTGTATTACTAGAGGACCCAGCTAGCAAAGAGAAGAAGCTTGAGGAGATGAAGAAAAATCAAGGCATATTGAAAGCC…	MKKRSRVGVGNDGLNRKIDWELRPGGMLVQKRDTGDANSGIMIKIKVSHGSYYHDLIVHAQSTFGDLKRVLAHDTGLEPKEQRLLFRGKEKEDNECLHIAGVKDMSKIVLLEDPASKEKKLEEMKKNQGILKAYEQVAKVRAQVDKLSQKVVDLETTLLSGTTVSDKEIVALTELLMVELFKLDSIVADGEAKVQRRVEVRRVQSFVDTLDNLKARNPNPFSKKSINAVSVTTKWERFELGVGSLHAPTPSPSSTKITQDWELFD
	MD04G1162100	Chr04	MdBAG4	25328062	25331428	4	GTTATTATTCACTCCCATAAGTATATTTTCCACATTTATTGGTTATTCGAAAATCCACCCCCAAAATATGTGATGAAAAATGCACCGCCCAAATAACCTTTTGACGTCGGACTCGGAATGATGGAGTGGAACCGACCACACCCTTCTACGAAACGCGTTCCGTTGAAACCCTCCGATCATCTCTCTCTCCCCCTCAAACCCTCACTCTGTCGCTAACTAGTCAATACCCTCACTACTACCACCACTCGATTCCCGCCCCATTTTTTTACGATGGTGAAAAGGAATCCGAACCCGAACCCGAACCCGAGTCCGAAAGCGTTGGTACCCGATCAGGACGAGGAGATTGATTGGGAGATGCGCCCAGGTGGCATGCTGGTCCAGAGGCGGGAAGCCGAGGAT…	ATGGTGAAAAGGAATCCGAACCCGAACCCGAACCCGAGTCCGAAAGCGTTGGTACCCGATCAGGACGAGGAGATTGATTGGGAGATGCGCCCAGGTGGCATGCTGGTCCAGAGGCGGGAAGCCGAGGATGACGCCTCGGCGACTGCTGGTGGTGGTGCTTCCGCCTCATTTCGGGGGCCCATGATGAAGATCGACGTAGTTCTCGGCCCGGGCAACGGGCCCCACTTCGAGCTCTTCCTCCCTGCTCACTCCACTTTCGGTGATATGAAGAAACATCTTGCACAGAAGGCTGATTTGGAGCCAGAGGAGCAGAGACTCTTTTTCAGGGGGGTGGAGAAGGCAGATGAGGAGCATCTGGACATTGTTGGTGTGAAGAATAACTCGAAGGTGCTGCTTCTG…	MVKRNPNPNPNPSPKALVPDQDEEIDWEMRPGGMLVQRREAEDDASATAGGGASASFRGPMMKIDVVLGPGNGPHFELFLPAHSTFGDMKKHLAQKADLEPEEQRLFFRGVEKADEEHLDIVGVKNNSKVLLLEARKESKVEEVNQSNEMPNNAGEVGVNSKEMPNNGGQVGAKSNVMSKASCAIAEVIAEVDKLAERVAALEVAVAGGTKVSDKEFVVSTELLMRQLLKLDSIQAEGEEKMQRRAEVRRVQNFVDALDALKARNSNPVKNSSDATAVTTKWETFDSGVGCLDPPTATPEPSSTEPNQEWEHFD
	MD05G1277400	Chr05	MdBAG5	41213884	41217510	4	AAAACCACACTATATAAACCCCCACACATACGACACCCTGTTCGTGTCGGCAGAAAACAGCGCATTAATTCGAGCCGTCGAGAGATATTTTCCCGATCAAAACCCCGCGCCGTCTGAGATTTTCCCGGAAAATTTCATCCGAATTTCCCAAACCAAAAAATGATGAAGCGGAGGTCCAATGCAAACGGCAGAGCGCGGGATAGCGCCAACAGTACGACGTCGGTCGACGAGGAAGTTGCGTGGGAAATGAGGCCCGGAGGAATGCTGGTGCAGAAGAGAGGTGAGAAATCGGACGCTCCGGCTCCGAATTTGCGGCTTCGGATTGCTTTCGGTGCTCTCCGTTACGAGATCTCGGCCAGTGCTCAGTCCACATTCGGTAAAAATGATATTGATTTACCG…	ATGATGAAGCGGAGGTCCAATGCAAACGGCAGAGCGCGGGATAGCGCCAACAGTACGACGTCGGTCGACGAGGAAGTTGCGTGGGAAATGAGGCCCGGAGGAATGCTGGTGCAGAAGAGAGGTGAGAAATCGGACGCTCCGGCTCCGAATTTGCGGCTTCGGATTGCTTTCGGTGCTCTCCGTTACGAGATCTCGGCCAGTGCTCAGTCCACATTCGGGGAGTTGAAGAAGGTTCTTACGGCAGAGACAGGGTTACAGCCTGGCGAGCAGAGGCTGTTATTCAGAGGAAAAGAGCGAGAAAACGGCGAGTACTTGGACATGTGCGGAGTCAAAGACCGGTCAAAAGTCGTACTGGTGGAGGACCCAGCGAGCATCGCGAGGAGGGCCGTTGAGATGCGT…	MMKRRSNANGRARDSANSTTSVDEEVAWEMRPGGMLVQKRGEKSDAPAPNLRLRIAFGALRYEISASAQSTFGELKKVLTAETGLQPGEQRLLFRGKERENGEYLDMCGVKDRSKVVLVEDPASIARRAVEMRRNAKIQAAHRAILDVSREVDKLAEQVSAIEKSISNGVKVPELQITTLIEMLMRLAIKLDNISAEGDASAQKNLQGKRVQKCVESLDVLKISNAKVKPVVVTTKWEPVVTTKWETFDPPTTTAQWELFD
	MD06G1072800	Chr06	MdBAG6	18123732	18125109	4	ATGGAGCCAATGAATTCAAAGAAGAACAAAATGCTTTCTTCGGAAAGTAAGCGCTCTGTTGACGATGGCAGTGGAGGTCCCGATAGCGTAGACTTGGAAATCAAGCCAGGGGGAATGCTGGTGCAAAAGAGAACCGATGAGATGAATCCTAGTTCTATTTCAATCCATACAATCAAATTTAGAGTCAAGTATGGCTCTTCGTACCACGAAATTCAAATCAGCTTCCAAGCAAGCTTTAGTACTAGGAAATTTCAAATCCAACTTTTGTTTTGGTTTTTTGATTGGAAAGAAACAATTAAATTGTTTTGTTTAATTGAATTTGGTTTTCGAATTTGCAGGGGAATTGAAGAAAATGTTGGCAGAGCGAATGAAGTTGCACCATCTGGATCAGAAGCTGAT…	ATGGAGCCAATGAATTCAAAGAAGAACAAAATGCTTTCTTCGGAAAGTAAGCGCTCTGTTGACGATGGCAGTGGAGGTCCCGATAGCGTAGACTTGGAAATCAAGCCAGGGGGAATGCTGGTGCAAAAGAGAACCGATGAGATGAATCCTAGTTCTATTTCAATCCATACAATCAAATTTAGAGTCAAGTATGGCTCTTCGTACCACGAAATTCAAATCAGCTTCCAAGCAAGCTTTAGGGAATTGAAGAAAATGTTGGCAGAGCGAATGAAGTTGCACCATCTGGATCAGAAGCTGATATACAAAAAGAAAGAGAGGGACTCCAAAAAGTATCTTGATGTGGCAAGAGTTAAACAAGGATCAAAGATCTTGCTGGTGGAGAACATTTTAGGTAGAGAA…	MEPMNSKKNKMLSSESKRSVDDGSGGPDSVDLEIKPGGMLVQKRTDEMNPSSISIHTIKFRVKYGSSYHEIQISFQASFRELKKMLAERMKLHHLDQKLIYKKKERDSKKYLDVARVKQGSKILLVENILGREKRCLELLKNSSVEKSSKSLAEINLEVTALETTDSTGGKVSTMDVENLTELLMMKLIKLDGIVGTGHLKLQRRVTRVQKYIKILDMLKHQNSKSSRNGAKIKLQQQEIKKIQLATKGLKTDAETTRALEARKFDTQKSSDAAATTIEF
	MD07G1264300	Chr07	MdBAG7	33315223	33317551	4	TTCCAACAGCTCAGTAGGCTAGCTGGCTTCCCACTTGTTTCTTTTACTCTTTTTATTTTTTTATTTATTTTTCCTCCTCTTCCTCTTCCTCTTCCTCCTCCGCGAGTTCTCCAGAACAAGGAGAAAAAAAAAGGAGAACCAAAATTATCAGATTGTTAGGTTCTGATTTCGCATTGATTTTCCCGGCACCACTTTGGGAAATCTCGGGGTTCAGCTTACTTGGTTCATTTTGTTTTCTCGGGAAAATTACTGTTTTTTTTTTCCGGGAGAAATTTCTCCTGTGTTTGAGTTTAGTCTGCATTTTTTGGCCGAAGATCCGGGTCCTGGTGGGTTCTGTGTCGGACCCGGTTCAGTAAACCTTTCCTTGTTTCTATCTTCTAGCGCAAGGCTTGAACTTTA…	ATGATGAGGATGAAGACGAAGACTACAGGGGTGTCACTGGCCGAGTTGAATGGAAGGTCAGGCGGCGGCGGAGCTGACTCGGGGCAGGGAGAGTGGGAGCTCAGACCGGGAGGAATGCTGGTTCAGAAACGGAATCCGGACTCTGATCGGAACTCGGTGCCTCCACCGACAATTCGGGTTCGGGTCAAATATGGGTCAATTTACCATGAAATCAGCATCAGCGCTCAATCTTCTTTTGGGGATTTGAAGAAAATGTTGGTTGGACCGACTGGTTTGCACCATCAAGATCAGAAATTGATATTCAAAGACAAGGAGAGGGACTCGAAGGCTTTTCTCGACATGTCTGGGGTGAAGGACCGGTCGAAGATGGTGTTAGTTGAGGACCCTATTAGCCAAGAA…	MMRMKTKTTGVSLAELNGRSGGGGADSGQGEWELRPGGMLVQKRNPDSDRNSVPPPTIRVRVKYGSIYHEISISAQSSFGDLKKMLVGPTGLHHQDQKLIFKDKERDSKAFLDMSGVKDRSKMVLVEDPISQEKRYLEMRRNAKMEKASKSISEISLEVDRLAGQVSALESIISKGKKVAEQDVLVLIDQLMNQLLKLDGIMGDGDVKLQRKMQVKRVQKYVETLDVLKVKNSLPSSNGSQIPKQVQQRHSNGHSNGNGHRLAPIQEHQPRRSVGYSPTHNQQLQQQEQPSGQSASGPVVVTTQWETFDSAPALIPASSTSKAANQSPYPRFNWESFE
	MD07G1178100	Chr07	MdBAG8	25744950	25745223	1	ATGAACGAGTCCCTGATGCGGCTGCTGCTGAAGCTGGACTCGGACCCCGCGGTGAGGGAAGCGAGGAGAAAGGTGAGCCGTCGAATCGTGGGGCTGCAGAAGATCGTGGACGCAATCGTATCGGAAGACATGGATGGCTTCTGGGGTGGCAGAGACGGTGGGTTTGGGAGGAACTGGGACGACGTCCTTGCAGAGATGAAGGAGGAGGCGTGTAGGGACAAAGGAGGGGAAGAGATGGAGAGGTTTTGCGCTCAGTATATGGGGTTTTTCTAG	ATGAACGAGTCCCTGATGCGGCTGCTGCTGAAGCTGGACTCGGACCCCGCGGTGAGGGAAGCGAGGAGAAAGGTGAGCCGTCGAATCGTGGGGCTGCAGAAGATCGTGGACGCAATCGTATCGGAAGACATGGATGGCTTCTGGGGTGGCAGAGACGGTGGGTTTGGGAGGAACTGGGACGACGTCCTTGCAGAGATGAAGGAGGAGGCGTGTAGGGACAAAGGAGGGGAAGAGATGGAGAGGTTTTGCGCTCAGTATATGGGGTTTTTCTAG	MNESLMRLLLKLDSDPAVREARRKVSRRIVGLQKIVDAIVSEDMDGFWGGRDGGFGRNWDDVLAEMKEEACRDKGGEEMERFCAQYMGFF
	MD10G1256300	Chr10	MdBAG9	35077512	35080527	4	CCCTCTAAGTGTCGGCAGAAAACAGCGCATTAATTCATGCCGTCGAAAGATATTTTCCAGAGAAAATCCCGCGCCGGCTGAGACATTTTCCCGGAAAATTTCAGCCGAATTTCCCAACGGAAAAATGATGAAGCGGAGGTCCAATGGGAAAGGCAGAGCGGGGGATAGCCGTGATAATATGGCGCAGTCCTCGACGTCGAGGGACGAGGAAGTTGCGTGGGAAATGAGGCCCGGAGGAATGCTGGTCCAGAAAAGAGGAGAGAAATCCGACGCTCCGGCTCCGAATTTGTGTCTCCGGATTTCATTCGGCGCTCTCCGTTACGAGATGTCGGCCAGCGCTCAGTCCACATTCGGTAAAAATGACCTTGATCTAACGTTTCGTATTCTTTGTTTTGTTTT…	ATGATGAAGCGGAGGTCCAATGGGAAAGGCAGAGCGGGGGATAGCCGTGATAATATGGCGCAGTCCTCGACGTCGAGGGACGAGGAAGTTGCGTGGGAAATGAGGCCCGGAGGAATGCTGGTCCAGAAAAGAGGAGAGAAATCCGACGCTCCGGCTCCGAATTTGTGTCTCCGGATTTCATTCGGCGCTCTCCGTTACGAGATGTCGGCCAGCGCTCAGTCCACATTCGGGGAGTTGAAGAAGGCTCTTACGGCGAAGGCAGGGCTACAGCCTGGCGAGCAGAGGCTGCTATTCAGAGGAAAAGAGCGAGAAAACGGCGAGTACTTGGACATGTGCGGAGTCAAAGATCGTTCAAAAGTCGTACTGATGGAGGACCCAACGGGCATCGAGAGGAGGGCC…	MMKRRSNGKGRAGDSRDNMAQSSTSRDEEVAWEMRPGGMLVQKRGEKSDAPAPNLCLRISFGALRYEMSASAQSTFGELKKALTAKAGLQPGEQRLLFRGKERENGEYLDMCGVKDRSKVVLMEDPTGIERRAVEMRRNARIQTAHRAILNVSMEVDKLAEQVSAIENSISNGVKVPELQITTPIEMLMRQAIKLDKISAEGDASAQKNLQGKRVQKCVESLDVLKISNAKVKPVVVTTKWETFDPPPTTAKWEFFD
	MD10G1331200	Chr10	MdBAG10	40925724	40926366	1	AAGATGATGAAACCCTCTCGCAGTCGCAGGCTCAGCTTCTCCTCCTCCGCCTCCACCACCGTCACCTACACCCTCCACAATGACCAACCTGCCCCTCCCGCCACCACCGAAATTCCCATCCAGTCCTCGGACACCCCAATTCCCATCACCCTTCACTTACCGCAATCCACCGCAGCCATCAAAATTCAGTCGGCCTACCGGGCCCACCTCATCCGCACCCACTTCAAAACAATCGCAGCCGTCCACTCCGAGGCCGACGAGTTCCAGCGCCTGATCCAACGGCAGGACACTGTCGACGCCGTTAGGACAAGCGAGCGCGAGAAGCTGAGGATGAACGAGTCCCTGATGCGGCTGCTGCTGAAGCTGGACTCGGTCCCCGGGGTGGACCCCGCGGTGAGG…	ATGATGAAACCCTCTCGCAGTCGCAGGCTCAGCTTCTCCTCCTCCGCCTCCACCACCGTCACCTACACCCTCCACAATGACCAACCTGCCCCTCCCGCCACCACCGAAATTCCCATCCAGTCCTCGGACACCCCAATTCCCATCACCCTTCACTTACCGCAATCCACCGCAGCCATCAAAATTCAGTCGGCCTACCGGGCCCACCTCATCCGCACCCACTTCAAAACAATCGCAGCCGTCCACTCCGAGGCCGACGAGTTCCAGCGCCTGATCCAACGGCAGGACACTGTCGACGCCGTTAGGACAAGCGAGCGCGAGAAGCTGAGGATGAACGAGTCCCTGATGCGGCTGCTGCTGAAGCTGGACTCGGTCCCCGGGGTGGACCCCGCGGTGAGGGAA…	MMKPSRSRRLSFSSSASTTVTYTLHNDQPAPPATTEIPIQSSDTPIPITLHLPQSTAAIKIQSAYRAHLIRTHFKTIAAVHSEADEFQRLIQRQDTVDAVRTSEREKLRMNESLMRLLLKLDSVPGVDPAVREARRKVSRRIVGLQEIVDAIVSEDVDGFWGGRDGGFGRNWDDVLAEMEEEVCRDRGGEEMERYCAQYLGFRCLQRFLQE
	MD11G1067400	Chr11	MdBAG11	5750911	5753582	4	TCTGTTTCGAGGTCCCTGTCTTCAAGTGCCTTTTCTTTGCTTACTCAACCCGCCAAGCCATCACGCACTCTCACCTCTCTCTTTCTGCAATTCCACCTTTTCCATTTTCCCTATAATTCTATATCTTTATTTTTTTATGATCCTCTCAGATAAATAGAATGAAAAAAAGAACAAGAGTTGGTGTGGAAAATGATGGGTTAAATAGGAAAATAGATTGGGAGCTGAGGCCAGGTCGAATGCTTGTTCAAAAGAGAGACATTGGGGATGCAAATTCTGGGATTATGATCAAGATCAAGGTTTCTCATGGTTCTTATTACCATGATGTCCTTGTCCATGCTCAATCCACTTTTGGTAAATCTTCTCATTAATCTAATTTAAATTTTCTTTCTGGGTTCTTGT…	ATGAAAAAAAGAACAAGAGTTGGTGTGGAAAATGATGGGTTAAATAGGAAAATAGATTGGGAGCTGAGGCCAGGTCGAATGCTTGTTCAAAAGAGAGACATTGGGGATGCAAATTCTGGGATTATGATCAAGATCAAGGTTTCTCATGGTTCTTATTACCATGATGTCCTTGTCCATGCTCAATCCACTTTTGGTGATCTGAAAAGAGTTCTTTCCCCTGAGACCGGATTGGAGCCAAAGGAACAAAGATTGTTGTTCAGAGGGAAAGAAAAGGAAGATAATGAATGTCTGCACATAGCGGGCGTAAAAGATATGTCGAAGATTGTATTACTAGAGGACCCGGCTAGCAAAGAGAAGAAGCTTGAAGAGATGAAGAAAAATCAAGGCGTATTGAATGCG…	MKKRTRVGVENDGLNRKIDWELRPGRMLVQKRDIGDANSGIMIKIKVSHGSYYHDVLVHAQSTFGDLKRVLSPETGLEPKEQRLLFRGKEKEDNECLHIAGVKDMSKIVLLEDPASKEKKLEEMKKNQGVLNAYEEVAKVRAEVDKLSQKIVDLETSLLSGLKVSDREIVVLTELLMVELLKLDSIVADGEAKVQRRVEVRRVQSFVDTLDNLKARNSNPFSKKSINAVSVTKNWERFELGVGSLHIPTPLPSSTKITQDWELFD
	MD12G1174600	Chr12	MdBAG12	25482687	25485377	4	ATGGAAAACACCGACCAACCCTTTAACGAAACGCGTTCCGTTAAAACCCGTACGATCATCTCTGCCTCAAACCCTCACTCAGTCGCTATCCAGTCAATACCGTCGATACAAAGCCCTTCTTTTCCCAAATTCTCGAACCCCCACCCGACACCTTCCATTTCGAGATACCCCGACTCGATTCGCGCCCCATTTTTTATGATGGTGAAAAACAATCCGAACCCGAATCCGAATCCGAATCCGAAGGTGCCGGTTCCCGATCAGAACGAGGAGATCGATTGGGAGATGAGGCCAGGTGGCATGCTGGTCCAGAGGCGGGAAGATGAGGACGCGGCGGCAGTGGCTGCTGGTGTTGGTGCTTCCGCCTCCTCTCGTGGGCCCATGATCAAGATCGACGTCGTT…	ATGGAAAACACCGACCAACCCTTTAACGAAACGCGTTCCGTTAAAACCCGTACGATCATCTCTGCCTCAAACCCTCACTCAGTCGCTATCCAGTCAATACCGTCGATACAAAGCCCTTCTTTTCCCAAATTCTCGAACCCCCACCCGACACCTTCCATTTCGAGATACCCCGACTCGATTCGCGCCCCATTTTTTATGATGGTGAAAAACAATCCGAACCCGAATCCGAATCCGAATCCGAAGGTGCCGGTTCCCGATCAGAACGAGGAGATCGATTGGGAGATGAGGCCAGGTGGCATGCTGGTCCAGAGGCGGGAAGATGAGGACGCGGCGGCAGTGGCTGCTGGTGTTGGTGCTTCCGCCTCCTCTCGTGGGCCCATGATCAAGATCGACGTCGTT…	MENTDQPFNETRSVKTRTIISASNPHSVAIQSIPSIQSPSFPKFSNPHPTPSISRYPDSIRAPFFMMVKNNPNPNPNPNPKVPVPDQNEEIDWEMRPGGMLVQRREDEDAAAVAAGVGASASSRGPMIKIDVVLGPGNGPRYELFLPAHSTFGDMKKHVSQKTNLEPEVQRLFFRGMEKADEEHLDIAGVKNNSKVLLLEARKESKVEEVNQSNEMRVGAGEVRVNSKEVPTGGGDVGGKSNVMSKASQAIAEVRAEVDKLAERVAALEVAVAGRNEVSDKEFVVPTELLTRQLLKLDGIQAEGEEKMQRKAEVRRVQNFVDALDALKTRNSNPVNNSSNAVTVTTEWETFDSGVGSLNPPTSTPEPSSTEPNQEWEHFD
	MD13G1123300	Chr13	MdBAG13	9142915	9143929	1	ATGGATCCATTCTTCAGAAGGCATTGGCACAATTTCGCCCCACAACATCAGTACCCGCAGACCAATTTCGCGCCACAACATCAGTACCCGCTGGAGGCGAGGCAAGTCCCGGTCCAGCGCCGAGCGGACCCGTCGCCGAAGGTGGTCTCGATCCCGGTTCAGTACGTCGGGTTGGAGCGCAGGCGGTCCGAGTCGGCGCTGAAAATCCAGAAGGCGTTCAGAGGGTTCCTGGTGAGGAAAAGCGTGAGGAAGATCGCGGCGATCAGAGTCGAGGTCAGCGAGATCGAGAAGCGCATTTCGAAGCGAGAGGCGGTGGAATTGATGAGGAGGGACGCCAAGGAGCGGCTGAAGGTGAACGAGACGCTGATGAACTTGCTGTTGAAGTTGGATTCGGTGAAG…	ATGGATCCATTCTTCAGAAGGCATTGGCACAATTTCGCCCCACAACATCAGTACCCGCAGACCAATTTCGCGCCACAACATCAGTACCCGCTGGAGGCGAGGCAAGTCCCGGTCCAGCGCCGAGCGGACCCGTCGCCGAAGGTGGTCTCGATCCCGGTTCAGTACGTCGGGTTGGAGCGCAGGCGGTCCGAGTCGGCGCTGAAAATCCAGAAGGCGTTCAGAGGGTTCCTGGTGAGGAAAAGCGTGAGGAAGATCGCGGCGATCAGAGTCGAGGTCAGCGAGATCGAGAAGCGCATTTCGAAGCGAGAGGCGGTGGAATTGATGAGGAGGGACGCCAAGGAGCGGCTGAAGGTGAACGAGACGCTGATGAACTTGCTGTTGAAGTTGGATTCGGTGAAG…	MDPFFRRHWHNFAPQHQYPQTNFAPQHQYPLEARQVPVQRRADPSPKVVSIPVQYVGLERRRSESALKIQKAFRGFLVRKSVRKIAAIRVEVSEIEKRISKREAVELMRRDAKERLKVNETLMNLLLKLDSVKGVDSGVRDFRRAVIKKAIALQERVDSAVAENPQIDQTLELQSESPVNSDETQNSQSVELESAAGPQIETVRHGNAWGCREVEGSVSDSESSGSSCDDSPNPLEDGVEDVKVVEREEVAEEEGAGEIMKDDDKRSSSRELLERVAEDNAKMMGMMEELFEKNQMQTRMLSSLSQRVEQLERALVCERLRRRKRRHAAGTADFVSK
	MD16G1124100	Chr16	MdBAG14	8961739	8962447	1	ATGGATCCATTCTTCAGAAGGCATTGGCACAATTTCGCCCCACAACAACGGTACCCGCAGACCAATTTCGCGCCACAACATCAGAACCCGCAGAACGCGAGGCAAGTCCCGGTCCAGCGCCGAGCGGACCCGTCGCCGAAGGTGGTCTCAATCCCGGTCCACTACGTCGGGTCGGAGCGCAGCCGGTCGGATTCCGCGCTGAAAATCCAGAAGGCGTTCAGAGGGTTTATGGTGAGGAAAAGCGTGAGAAAGATCGCCGCCATCAGAGTCGAGGTCGGTGAGATCGAGAAGCGGACTTCGAAGCGAGAGGCGGTGGAATTGATGAGGAGGGACGCCAAGGAGCGGCTGAGGGTCAACGAGACGCTGATGAACTTGCTGTTGAAGTTGGATTCGGTGAAG…	ATGGATCCATTCTTCAGAAGGCATTGGCACAATTTCGCCCCACAACAACGGTACCCGCAGACCAATTTCGCGCCACAACATCAGAACCCGCAGAACGCGAGGCAAGTCCCGGTCCAGCGCCGAGCGGACCCGTCGCCGAAGGTGGTCTCAATCCCGGTCCACTACGTCGGGTCGGAGCGCAGCCGGTCGGATTCCGCGCTGAAAATCCAGAAGGCGTTCAGAGGGTTTATGGTGAGGAAAAGCGTGAGAAAGATCGCCGCCATCAGAGTCGAGGTCGGTGAGATCGAGAAGCGGACTTCGAAGCGAGAGGCGGTGGAATTGATGAGGAGGGACGCCAAGGAGCGGCTGAGGGTCAACGAGACGCTGATGAACTTGCTGTTGAAGTTGGATTCGGTGAAG…	MDPFFRRHWHNFAPQQRYPQTNFAPQHQNPQNARQVPVQRRADPSPKVVSIPVHYVGSERSRSDSALKIQKAFRGFMVRKSVRKIAAIRVEVGEIEKRTSKREAVELMRRDAKERLRVNETLMNLLLKLDSVKGVDSGVRDLRRAVIKKAIALQERVDSAVAEIPQIDQTLELQSESPVNSDETPNLQSLELESAAEAHIETVPHGNAWVCREEEGAVRKKACCCDYRFRVQVPS
	MD17G1215100	Chr17	MdBAG15	26194550	26194823	1	ATGAACGAGTCCCTGATGCAACTGCTGCTGAAGCTGGACTCGGACCCCGCGGTGAGGGAAGCGAGGAGAAAGGTGAGTCGTCGGATCGTGGGGCTGCAGAAGATCGTGGACGCAATCGTATCGGAAGACATGGATGGCTTCTGGGGTGGCAGAGACGGTGGGTTTGGGAGGAACTGGGACGACGTCCTTGCGGAGATGAAGGAGGAGGCGTGCAGGGACAAAGGAGGGGAAGAGATGGAGAGGTTTTGCGCTCAGTATATGGGGTTTTTCTAG	ATGAACGAGTCCCTGATGCAACTGCTGCTGAAGCTGGACTCGGACCCCGCGGTGAGGGAAGCGAGGAGAAAGGTGAGTCGTCGGATCGTGGGGCTGCAGAAGATCGTGGACGCAATCGTATCGGAAGACATGGATGGCTTCTGGGGTGGCAGAGACGGTGGGTTTGGGAGGAACTGGGACGACGTCCTTGCGGAGATGAAGGAGGAGGCGTGCAGGGACAAAGGAGGGGAAGAGATGGAGAGGTTTTGCGCTCAGTATATGGGGTTTTTCTAG	MNESLMQLLLKLDSDPAVREARRKVSRRIVGLQKIVDAIVSEDMDGFWGGRDGGFGRNWDDVLAEMKEEACRDKGGEEMERFCAQYMGFF
Arabidopsis thaliana	AT5G52060.1	Chr5	AtBAG1	21152213	21154244	4	AGAATTAGCTGGCCACTCGTTATTATTCGTTTTCTCTTAAATACTTAATTCTTTTTTTTCCCAAACAGTTTCTCTGAAACTAAGAAACTCTAACAGAGAATCCGGATGCTTTTCTCTGATTCTTCTACTCTTTCCTAATTTACCGATTTTCTCGGGAATCCAAAATCCCGTTTCTCTTTTTCTCGAGTTAAAAAACTTTCGATCTGAAGTCAATTCAGATTCTTCTTGGAAGCTCAAAGAAGAAGAAGAGAGAAGAGAGAGAGACTAGTGATTTGGTTTAGTTCGTTGGATCAGAAAGGTCTCTGCTTTGATCTTTGTAGTACACGTGGCGAAAAGGGTCGGAATTTGGAGTTGTGTTGATGATGTTCCAAGTCTCAGATTTCTTGTAATAACATTCTC…	ATGATGAAGATGATGAGAAACAAACCGACAAATCTTCCGACGGCGGGTATGACTAATGGCGGTAGAGGTTCCGGCGGCGGTGGTGGTGGCGGCGGCAGGGAGTCAGGCGGTCGTGATTTGGAAATTAGACCTGGTGGTATGTTGGTTCAGAAACGTAACCCGGATTTGGATCCTGTCGGACCTCCACCACCACCGATGATCAGAGTTAGAATCAAGTACGGTGCCGTCTACCATGAGATCAATATTAGTCCTCAAGCTTCTTTTGGGGAGCTAAAGAAGATGTTGACTGGACCAACGGGTATTCATCATCAAGATCAGAAGCTAATGTATAAAGATAAAGAGAGGGATTCGAAGGCGTTCCTCGATGTTTCGGGAGTGAAAGATAAATCTAAGATGGTG…	MMKMMRNKPTNLPTAGMTNGGRGSGGGGGGGGRESGGRDLEIRPGGMLVQKRNPDLDPVGPPPPPMIRVRIKYGAVYHEINISPQASFGELKKMLTGPTGIHHQDQKLMYKDKERDSKAFLDVSGVKDKSKMVLIEDPLSQEKRFLEMRKIAKTEKASKAISDISLEVDRLGGRVSAFEMVTKKGGKIAEKDLVTVIELLMNELIKLDAIVAEGDVKLQRKMQVKRVQNYVETLDALKVKNSMANGQQKQSSTAQRLAPIQEHNNEERQEQKPIQSLMDMPIQYKEKKQEIEEEPRNSGEGPFVLDSSAKWETFDHHPVTPLSSTTAKNNAIPPRFNWEFFD
	AT5G62100.1	Chr5	AtBAG2.1	24940395	24941974	4	CTTCTTCTTGATCTTTTTCAGAAATCAACTTCATCTCATCATTCCTCTGTTTTTTTCTCTCTATCTCTCTTAATAAAGAAAATGATGAAAATGAGTATCGGAACAACAACTTCCGGCGACGGTGAAATGGAGCTCCGACCTGGAGGAATGGTTGTACAGAAAAGGACGGATCATAGCTCAAGCGTGCCACGTGGCATTCGGGTTCGGGTCAAATACGGGTCGGTCCATCACGAGATCAGTATCAACTCTCAATCTACTTTCGGTAAACGACACAAAACATTCCGAGTTATACAGTATTTCCTTTATACTATTAGTATGCTCTGTTTTTGGAATTTGATTGTTGTTGTTGTTGAATTTAACAACAGGGGAATTAAAGAAGATATTGTCTGGTGCGACAGG…	ATGATGAAAATGAGTATCGGAACAACAACTTCCGGCGACGGTGAAATGGAGCTCCGACCTGGAGGAATGGTTGTACAGAAAAGGACGGATCATAGCTCAAGCGTGCCACGTGGCATTCGGGTTCGGGTCAAATACGGGTCGGTCCATCACGAGATCAGTATCAACTCTCAATCTACTTTCGGGGAATTAAAGAAGATATTGTCTGGTGCGACAGGAGTTCATCATCAAGACATGCAGATTATATACAAAGACAAAGAAAGAGACTCAAAGATGTTTCTTGATCTTTCTGGTGTCAAAGATCGTTCGAAACTTATTCTTATAGAAGATCCCATTTCTCAGGAGAAACGTCTCCTTGAGTTGAGGAAAATCGCCACCAAAGAGAAATCATCTAAAGCAATC…	MMKMSIGTTTSGDGEMELRPGGMVVQKRTDHSSSVPRGIRVRVKYGSVHHEISINSQSTFGELKKILSGATGVHHQDMQIIYKDKERDSKMFLDLSGVKDRSKLILIEDPISQEKRLLELRKIATKEKSSKAISDISFQVERLAGQLSAFDTVIGKGGKVEEKNLENLMEMLMNQLVKLDAISGDGDVKLKKKMQNLMIRFTNCWKEERLHKYVEALDLLKIKNSRQPQTKPKPQYKEREMLTFYEEASRKPTASSSSPPVIITTRWETFDSSSASTATLQPVRPVHPKFKWELFN
	AT5G62100.2	Chr5	AtBAG2.2	24940395	24941974	4	CTTCTTCTTGATCTTTTTCAGAAATCAACTTCATCTCATCATTCCTCTGTTTTTTTCTCTCTATCTCTCTTAATAAAGAAAATGATGAAAATGAGTATCGGAACAACAACTTCCGGCGACGGTGAAATGGAGCTCCGACCTGGAGGAATGGTTGTACAGAAAAGGACGGATCATAGCTCAAGCGTGCCACGTGGCATTCGGGTTCGGGTCAAATACGGGTCGGTCCATCACGAGATCAGTATCAACTCTCAATCTACTTTCGGTAAACGACACAAAACATTCCGAGTTATACAGTATTTCCTTTATACTATTAGTATGCTCTGTTTTTGGAATTTGATTGTTGTTGTTGTTGAATTTAACAACAGGGGAATTAAAGAAGATATTGTCTGGTGCGACAGG…	ATGATGAAAATGAGTATCGGAACAACAACTTCCGGCGACGGTGAAATGGAGCTCCGACCTGGAGGAATGGTTGTACAGAAAAGGACGGATCATAGCTCAAGCGTGCCACGTGGCATTCGGGTTCGGGTCAAATACGGGTCGGTCCATCACGAGATCAGTATCAACTCTCAATCTACTTTCGGGGAATTAAAGAAGATATTGTCTGGTGCGACAGGAGTTCATCATCAAGACATGCAGATTATATACAAAGACAAAGAAAGAGACTCAAAGATGTTTCTTGATCTTTCTGGTGTCAAAGATCGTTCGAAACTTATTCTTATAGAAGATCCCATTTCTCAGGAGAAACGTCTCCTTGAGTTGAGGAAAATCGCCACCAAAGAGAAATCATCTAAAGCAATC…	MMKMSIGTTTSGDGEMELRPGGMVVQKRTDHSSSVPRGIRVRVKYGSVHHEISINSQSTFGELKKILSGATGVHHQDMQIIYKDKERDSKMFLDLSGVKDRSKLILIEDPISQEKRLLELRKIATKEKSSKAISDISFQVERLAGQLSAFDTVIGKGGKVEEKNLENLMEMLMNQLVKLDAISGDGDVKLKKKMQEERLHKYVEALDLLKIKNSRQPQTKPKPQYKEREMLTFYEEASRKPTASSSSPPVIITTRWETFDSSSASTATLQPVRPVHPKFKWELFN
	AT5G62100.3	Chr5	AtBAG2.3	24940395	24941974	4	CTTCTTCTTGATCTTTTTCAGAAATCAACTTCATCTCATCATTCCTCTGTTTTTTTCTCTCTATCTCTCTTAATAAAGAAAATGATGAAAATGAGTATCGGAACAACAACTTCCGGCGACGGTGAAATGGAGCTCCGACCTGGAGGAATGGTTGTACAGAAAAGGACGGATCATAGCTCAAGCGTGCCACGTGGCATTCGGGTTCGGGTCAAATACGGGTCGGTCCATCACGAGATCAGTATCAACTCTCAATCTACTTTCGGTAAACGACACAAAACATTCCGAGTTATACAGTATTTCCTTTATACTATTAGTATGCTCTGTTTTTGGAATTTGATTGTTGTTGTTGTTGAATTTAACAACAGGGGAATTAAAGAAGATATTGTCTGGTGCGACAGG…	ATGATGAAAATGAGTATCGGAACAACAACTTCCGGCGACGGTGAAATGGAGCTCCGACCTGGAGGAATGGTTGTACAGAAAAGGACGGATCATAGCTCAAGCGTGCCACGTGGCATTCGGGTTCGGGTCAAATACGGGTCGGTCCATCACGAGATCAGTATCAACTCTCAATCTACTTTCGGGGAATTAAAGAAGATATTGTCTGGTGCGACAGGAGTTCATCATCAAGACATGCAGATTATATACAAAGACAAAGAAAGAGACTCAAAGATGTTTCTTGATCTTTCTGGTGTCAAAGATCGTTCGAAACTTATTCTTATAGAAGATCCCATTTCTCAGGAGAAACGTCTCCTTGAGTTGAGGAAAATCGCCACCAAAGAGAAATCATCTAAAGCAATC…	MMKMSIGTTTSGDGEMELRPGGMVVQKRTDHSSSVPRGIRVRVKYGSVHHEISINSQSTFGELKKILSGATGVHHQDMQIIYKDKERDSKMFLDLSGVKDRSKLILIEDPISQEKRLLELRKIATKEKSSKAISDISFQVERLAGQLSAFDTVIGKGGKVEEKNLENLMEMLMNQLVKLDAISGDGDVKLKKKMQITQVC*
	AT5G07220.1	Chr5	AtBAG3	2265255	266967	4	ATTTATTTATTTCATAATATTAAAATTTAGAGTTGCAGAAAAAATAACAATTTACTTCCCTTTGTTCAGACGTTTCTTTATTCTTCTTCCTTCCTTCTTCTCCTTCTTCTTGATCGTGTTCAGAAATCATATTCATCACCTCTCTCTCTCTATGTCTCTATATTTGGATTCTTTATAACATGTGAGATCGATCTATTTTTGATCAGAGACAGAGAGAAGACTAGAAGAAGCAAAGAATATTTCAAGAATGATGAAGATGAATACAGGAACATCGCCGTCGGTCATCGGCGGCGGGACTAGTGGTAATGAGTGGGAGTCTCGACCTGGAGGAATGGTTGTTCAACGTCGGACAGATCAGAACTCCGATGTGCCACGTGTCTTTCGTGTTCGGGTTAAATA…	ATGATGAAGATGAATACAGGAACATCGCCGTCGGTCATCGGCGGCGGGACTAGTGGTAATGAGTGGGAGTCTCGACCTGGAGGAATGGTTGTTCAACGTCGGACAGATCAGAACTCCGATGTGCCACGTGTCTTTCGTGTTCGGGTTAAATACGGGTCGGTTTATCACGAGATCAACATCAATTCCCAATCTTCCTTCGGAGAGTTGAAGAAGATGTTGTCTGATCAAGTGGGACTTCACCATGAAGACATGAAGGTTTTGTACAAAGACAAAGAGAGAGATTCAAAGATGTTTCTTGATCTTTGTGGAGTTAAAGATCGGTCAAAGCTTGTTGTTAAAGAAGATCCAATTTCTCAGGAGAAACGTCTCCTTGCAAAAAGGAAAAACGCCGCCATTGAA…	MMKMNTGTSPSVIGGGTSGNEWESRPGGMVVQRRTDQNSDVPRVFRVRVKYGSVYHEININSQSSFGELKKMLSDQVGLHHEDMKVLYKDKERDSKMFLDLCGVKDRSKLVVKEDPISQEKRLLAKRKNAAIEKASKSISDISFEVDRLAGQVSAFETVINKGGKVEEKSLVNLIEMLMNQLLRLDAIIADGDVKLMRKMQVQRVQKYVEALDLLKVKNSAKKVEVNKSVRHKPQTQTRFEQRDLLSFVEEEEEEPRNSNASSSSGTPAVVASKWEMFDSASTAKAAETVKPVPPRFKWEFFD
	AT3G51780.1	Chr3	AtBAG4	19206767	19208310	4	AGGAGAATTTGTATGTTTTGAGGAGGTGTGCATCATCCGTCTATCAATACCCTGACAAGGAAAACCCTAATTTTTTTTGGCCCAAAGGGTTTTATACTTTAATCTCATACTCCGATTCATTGTCGAAAAACGATGATGCATAATTCAACCGAAGAATCGGAATGGGAGGTGAGACCTGGTGGTATGCTCGTCCAACGAAGAGACGACGCCGCTTCCTCCGACCACAAACCTCTCCAGGATCCCGACTCTGCTTCCGCCGCTTTTGCTCAAACCATCAGAATCACTGTTTCTCATGGCTCATCGCACCACGATCTTCATATTTCTGCTCACGCCACTTTCGGTAACAAAACTCTCAGCTCCGTTTCTGATCCATCGCCTGAAAATTCCAAATAATCGAAG…	ATGATGCATAATTCAACCGAAGAATCGGAATGGGAGGTGAGACCTGGTGGTATGCTCGTCCAACGAAGAGACGACGCCGCTTCCTCCGACCACAAACCTCTCCAGGATCCCGACTCTGCTTCCGCCGCTTTTGCTCAAACCATCAGAATCACTGTTTCTCATGGCTCATCGCACCACGATCTTCATATTTCTGCTCACGCCACTTTCGGGGATGTGAAGAAAGCTCTTGTTCAGAAAACTGGATTGGAAGCTAGTGAATTGAAGATCTTGTTCAGAGGAGTTGAGAGAGATGATGCTGAACAATTGCAAGCTGCTGGTGTTAAGGATGCGTCTAAGCTTGTTGTTGTTGTTGAGGATACGAATAAGAGAGTGGAACAACAGCCTCCTGTGGTAACTAAA…	MMHNSTEESEWEVRPGGMLVQRRDDAASSDHKPLQDPDSASAAFAQTIRITVSHGSSHHDLHISAHATFGDVKKALVQKTGLEASELKILFRGVERDDAEQLQAAGVKDASKLVVVVEDTNKRVEQQPPVVTKEMEKAIAAVNAVTGEVDKLSDRVVALEVAVNGGTQVAVREFDMAAELLMRQLLKLDGIEAEGDAKVQRKAEVRRIQNLQEAVDKLKARCSNPFVDQSKAAAVSTEWESFGNGVGSLNPPPPASPSANVTQDWEKFD
	AT1G12060.1	Chr1	AtBAG5	4076333	4076981	1	ATGAAACGTTCAAGAAAATTCTCATCGTCGACAACAACAACCACCGTTATTCACACTTTCTATAATGACCATACTACCCCTCCGGCAACCAAAGAAATCCCGATTGAAACTCCATTACCGGCGACGAAAGCCAACGTCAAAACAAACGCCACCGCCGCAGCAGCGAGGATTCAGTCTGGCTACCGTTCTTATAGGATCCGAAACCTATACAAGAAAATCTCATCCATCAATCGGGAAGCGAACCGTGTACAGAGCATAATCCAACGGCAAGAAACAGTAGACGCCATTAGAAGCGATGAGAAGGAACGTCTGAGAATGAACGAGACTCTGATGGCTCTGCTTCTGAAACTAGACTCCGTCCCTGGTTTAGATCCGACGATCAGAGAAGCTCGGAGGAAA…	ATGAAACGTTCAAGAAAATTCTCATCGTCGACAACAACAACCACCGTTATTCACACTTTCTATAATGACCATACTACCCCTCCGGCAACCAAAGAAATCCCGATTGAAACTCCATTACCGGCGACGAAAGCCAACGTCAAAACAAACGCCACCGCCGCAGCAGCGAGGATTCAGTCTGGCTACCGTTCTTATAGGATCCGAAACCTATACAAGAAAATCTCATCCATCAATCGGGAAGCGAACCGTGTACAGAGCATAATCCAACGGCAAGAAACAGTAGACGCCATTAGAAGCGATGAGAAGGAACGTCTGAGAATGAACGAGACTCTGATGGCTCTGCTTCTGAAACTAGACTCCGTCCCTGGTTTAGATCCGACGATCAGAGAAGCTCGGAGGAAA…	MKRSRKFSSSTTTTTVIHTFYNDHTTPPATKEIPIETPLPATKANVKTNATAAAARIQSGYRSYRIRNLYKKISSINREANRVQSIIQRQETVDAIRSDEKERLRMNETLMALLLKLDSVPGLDPTIREARRKVSRKIVGMQEILDSISETKDEIQWWNYNDLGGVDSGQGGGAWPLYWEEAVEEEMCRERGGEEMERFCAQYLGFRCFQRFLRE
	AT2G46240.1	Chr2	AtBAG6	18986132	18989947	2	GATCTGGAGAGCAGAAGAAATATCTTTTCCCTCTGAACGTTGTTGTTCGTCTTTCTATAAATCAAGAAATGTCTTTGGATTGTTCACTACCCATAGAAAAAGCTGCAATCATCTGAATCAGAAAGTAATTCGAAGAAGAAATCTGCTTTTTTTAATTGGTGGAGAGAGTGAGAGAGCTTCGCAGGAACTGAGTCATCGGAATTTACGGATCGTTTCTGTTTCGTGTAAGCTCCGTCATTTTCCCTTCTTAGTTTAATGAATAGCTTTGAGAATCTTGAGTTCATTGCTCTTAGTTTAATGAAGATGCGATTGATTTAGTTTGGCAGATTTTGGTGATTGTGGTAACGAAATAATTCTGAATGAACCAAATTCACATTGTATTTTTCTAATGATATATGG…	ATGATGCCTGTGTACATGGATCCATCACAACCATGTCAAATGAGACCACAGGAATACTATTATCAAGGATTTGGTAATAACTCTCAGCATATGGCAATGGATGCTCCACCACCGTGTCATGGAAGCTGCGTTCACGGCAACTTTCCTGCTTACTGGCCTCCTTGTTATCCCCCACAAGTACCGTACCATCAATGCTGCATGAATCGTTCCGCTTTCCATCCTCCTCACGCGTCTTACGCTCCGTCTTGTTACGTTCATCCACCATTTCCAGTTGGTTATCAACCTTGGTTTGATGTTGAGAAGGATGTGCCTGGGAAGCATCACTGCGGGAAATGTTCTTCCCAGATGTGTGATTTGAAGAAAGACAGAGGCGTTGTGATTGAAGAGCATGAGCCTGAG…	MMPVYMDPSQPCQMRPQEYYYQGFGNNSQHMAMDAPPPCHGSCVHGNFPAYWPPCYPPQVPYHQCCMNRSAFHPPHASYAPSCYVHPPFPVGYQPWFDVEKDVPGKHHCGKCSSQMCDLKKDRGVVIEEHEPEIEKGEAVLPVRSTNCPYPIIWIPHENARNQEYRSSLGLGKHNQPPAEVRAPDNMTIQKSFPESWRGCFPFDESSMKSLVQNQDSKKAQNGKTVEAPFDISKFKSLLQGQDMKEAQIQKNKEELGQLTYPTSWVPSRRKRDDVEASESSNEDRKKMQNGKTVEYPFDISMIKSLIQGQDVKEAQNQKNKEEPGQVPYPIFWIPSYGKRKDVEASESKESSNEGRNLESCPSDLHRNEGQITQAKGKEGNFECNVLSDAEEKSSVINI…
Solanum lycopersicum	Solyc01g095320	Chr1	SlBAG1	78890164	78895204	3	AGATTGAAAAAAAAAAAAGATTTTCAGAGCAGTTTTATAAAGAGAGAAAGCGAAGTTTGAGTACTGAAGAAGTTGGGTTGGTGGAGAGATTTGTGCTGGAAATTGAGTTATTTGGATTTTGTGGAACCGATTGGACGGAGCTTTTGTTCTTTCTTAACTGTAAGTTCATCTTATATTCTCTTAATAAGTAAATGGTTTGTTTCCAGCTTTTCTGTGTATCCTTGTTCTGAATTGCTCTGGTTTTGATTTTATCTAATTGAGTTTTTGGTATTTCTAGGTTATAAATATGGCCCTCTGTTTCCTTCATGTTATTTCACTCTGATTTTGCGGGTTTTATTGTACCAGGCATATCCTTTTAGCTTGGTTTTAGTTTGAGCGCTTCAATTTTTGGGTCTATAG…	ATGTATCCTACGAATCCTTACCAAAGGAACCAAGTACCTTACAATCCTCATTATTATCCCCGTTTCGAATCAAATCCTCATCATCATATGAACATTGATCCAACTAGATCTACTTTACCTTATGAATCTTGGCCTTGTGGTGGTAGCAACTATAGGCATCCTTATCCACCTGAGTGCCACAGTTGCTGTATCCATAACACTTCTCCGAGCCAGTGTGCGTTTAGCCCTCCATATCCTTACCTTCCACCATCTACCTACAACAACTGTAGTTATCCTACATATCCTGTGATGTATCCTACTCATTATGTTCCTCATCCCCATTTTACTATGGAGCAGCCCCGGTACGAGTATGAAAAGAATATGGGCAGAGATCATCACTGTTGTGGTTGTTCAAATCAT…	MYPTNPYQRNQVPYNPHYYPRFESNPHHHMNIDPTRSTLPYESWPCGGSNYRHPYPPECHSCCIHNTSPSQCAFSPPYPYLPPSTYNNCSYPTYPVMYPTHYVPHPHFTMEQPRYEYEKNMGRDHHCCGCSNHKCGSKKGGSSVKIEEHDQDKGNDCNDSLVPFGFNNCPYPVVCLPPDDMKNRERMKPDGSNCKEQEENPQPLKPLGDFRPSQQPNFWKLWPSHYGNSSGSPKENGDFPEKQHHDDAIRKQFPFPIIWMPYRPEEDREEVGKETESGLIAEKEPTSPSKLTKLMSHDSEDKRSSSKENEVNSGGDFHGKGLNKGSVVKTIPVKQVEQNEIFDGKKEEASQRHESDAKQKKITQEAGRKQSTSPTKSSKLPPVCLRVDPLPRKKSSSGN…
	Solyc03g026220	Chr3	SlBAG2	3614791	3618046	4	TATTAGTTTTTTTTTGTTTCTTGATCTATTTCAAGTTTTCAACATTGATACTAAAATTCATTGTTATCAATTTTTTCAATCGGTTTATTTTGCGATTTTTTGTACCGATAGTTTCAATTTTGGTGCTTATCCATTTGATTCTTTAACGAGATCTACCATTTTTGTTTTGTCTACTTTTTCTACTGCATTTATCGGCGGGTCGCCGACAGAGTTTTCTTGATTCCCCGGTTATTTCTTTTTATCTTTGTTATTGATTCTTTCGGTTAATAGACAAGTGATAATAGCTGGAAAGTTTGGCAGCAGTGCGTCTGGTGTTTTGCTGTTCCTTTCTTTTCTTCACGCGTGGCGTTCCTCTTAATGCTTAAAGCTCTGTTTTTCTAACTGGTTTTGGATTTGGGA…	ATGATGCGAATGAAGACCAAAACCACCGCTATGCCACCGATGATGAACGATAATTCGGCCGGCGGTAGAGACCGTGCTGCTGCCGACAACGAATGGGAAGTCCGACCCGGTGGAATGTTGGTTCAGAAGCGTAACCCGGATGCGGAAAACCGTCCTCCTCCACCTCCGATTCGGGTCCGGGTTAAGTATGGGTCAATTTACCATGAAATCAATATCAGTCCTCAAGCAACTTTTGGTGAATTGAAGAAGATGTTAACGGGGCCGACAGGGCTGCACCACCAAGATCAGAAGTTATTATACAAAGACAAAGAAAGAGACAACAATGCTTTCCTTGATATTTCCGGTGTTAAAGATAAGTCGAAGATTGTTGTAGTTGAAGATCCACTTTGCCAAGAGAAA…	MMRMKTKTTAMPPMMNDNSAGGRDRAAADNEWEVRPGGMLVQKRNPDAENRPPPPPIRVRVKYGSIYHEINISPQATFGELKKMLTGPTGLHHQDQKLLYKDKERDNNAFLDISGVKDKSKIVVVEDPLCQEKRYLELRKNAKMEKAAKTIADISFEVDRLAGQVSAFESIISKGAKVVEKDLVKVIELLMNQLLKLDGIVAEGDVKLQRKMQVKRVQKYVETLDVLKMKNSAPSRSGNHIPKQESSPSPQQHQRRYSNDQASSPVQNQNGSRRSFANSPTPAKHQEPSRHSASGSVVITTQWETFDPAPGPLLDHDSTTTPSNNNNHASYAQPRFNWDLL
	Solyc03g083970	Chr3	SlBAG3	48506931	48509768	3	TGTTACCCATAATACCCCTACTGTCACTTTCCCATTATCCTTTTTATTGACTTCTTCTTCTCCAACTCAACTTAACCTCTGCATCTTCAAGTTTTTAGCATTTGGTTTAGCTAGATTCAAGCGAAAATGAGCCGCTTCAGGAGATTTGACATCATCGACTACTCTTCTTCTCCTTCATTTTTCACCCCCAAAACCCTACTTCTAAACCCATACTTCCACATTGAAGATGAGCTTGACTGCACTCTCGATCTCATCTGCCCTAAGCCTTATGCACCCAATACCTTCCTCGATCTAGAAAATTTCGATTCCATTACCGATCTGATCCAAATCGAAACAACCCCTTTTTACAGCACTACTCGCCGGGTCCAGCACCGGATAGGACTCGGTACTGAGTTGCAA…	ATGAGCCGCTTCAGGAGATTTGACATCATCGACTACTCTTCTTCTCCTTCATTTTTCACCCCCAAAACCCTACTTCTAAACCCATACTTCCACATTGAAGATGAGCTTGACTGCACTCTCGATCTCATCTGCCCTAAGCCTTATGCACCCAATACCTTCCTCGATCTAGAAAATTTCGATTCCATTACCGATCTGATCCAAATCGAAACAACCCCTTTTTACAGCACTACTCGCCGGGTCCAGCACCGGATAGGACTCGGTACTGAGTTGCAATGTCTCTCTGACCGAGTCACCGCGCTCGAGCGGATGTTGACGGAGAAGAAGAAGAAGAATAAAATTGGGGAGCGGAAGTACACGTGGACGGCTGAGATTAAGAGCCCTGAGAAGGATGGGGTTGAT…	MSRFRRFDIIDYSSSPSFFTPKTLLLNPYFHIEDELDCTLDLICPKPYAPNTFLDLENFDSITDLIQIETTPFYSTTRRVQHRIGLGTELQCLSDRVTALERMLTEKKKKNKIGERKYTWTAEIKSPEKDGVDRKYKWIAEVKDGKKKGALDKNYKFSAEIKGKGDDSRSYSFKASNVTDSDSDSDESQKKEKKDKMKKKKKSVGCTRLVEIEEPTHHGALVLRQVFAKRVEKRRGKRKELSPQDAALAIQMSFRAYLIKRSQALRALRELAIAKTKLKELRALFNNFTYRRRVARDAEERQRFSEKIIVLLLTVDAIEGVDMMVRSAKKSIVDELEAMLDVIDPQPGGRPLSVARRRTFDMPDGAIQKELAAGVAQVVRMLDESNGAETFEGCL
	Solyc04g014740	Chr4	SlBAG4	5028767	5029067	1	ATGAACGAGGCACTGATGAATTTGCTACTGAGATTAGACTCAGTTCCAGGAATTGATCCATCAGTCAGGGAGCTGAGACGAGATCTGAGTCGCCGGATTGTAGGGCTGCAAGAGATACTAGATGCTGTTTCTGACACTAAAATACAAAACTGGGATGGATTTCTAATGGATTGGGATGATGTTGTAGAGAGGATGGAAATGGATGTATGCAAAGAGAGAGGTGGCGGCGATGAACTAGAGGCGTTTTGTGCTGAGCATTTGGGATTTCGATGCCTACAAAGGTTTCTCCGCGATCAATGA	ATGAACGAGGCACTGATGAATTTGCTACTGAGATTAGACTCAGTTCCAGGAATTGATCCATCAGTCAGGGAGCTGAGACGAGATCTGAGTCGCCGGATTGTAGGGCTGCAAGAGATACTAGATGCTGTTTCTGACACTAAAATACAAAACTGGGATGGATTTCTAATGGATTGGGATGATGTTGTAGAGAGGATGGAAATGGATGTATGCAAAGAGAGAGGTGGCGGCGATGAACTAGAGGCGTTTTGTGCTGAGCATTTGGGATTTCGATGCCTACAAAGGTTTCTCCGCGATCAATGA	MNEALMNLLLRLDSVPGIDPSVRELRRDLSRRIVGLQEILDAVSDTKIQNWDGFLMDWDDVVERMEMDVCKERGGGDELEAFCAEHLGFRCLQRFLRDQ
	Solyc06g007240	Chr6	SlBAG5	1312919	1316330	4	GGGGAAAAAATGAGGAAAAAATCATCAACTTCTTCAAAAAGTAAGAATGAGGTAATTAAAGATGAGAATTATAAATACACTGAGTTTGAAGAGGAAAAAAAGAGTTGTATTATTGATTGGGAAGTTAGGCCTGGAGGCTTATTAGTTCAAAAAAGAGTTGGAATTTCTGCTGAGGAAAATTCTGTTGCTGGTCCTATGATCAAGATCAAAGTCTCTTATGATTCTTGTTACCATGATGTTGTTGTTCCTGCTGAATCAACATTTGGTAAACCACTAAATTTTTGCACTTTTGATGTTGTTGATCATAGTTAAAGAGAGACAGCTTTGACGTAACTGGTAAAGTTATTGTAATGTTATTAAGCAGGTTATGAATTTCGAGCTGTGAATATAGTCTCTTGT…	GGGGAAAAAATGAGGAAAAAATCATCAACTTCTTCAAAAAGTAAGAATGAGGTAATTAAAGATGAGAATTATAAATACACTGAGTTTGAAGAGGAAAAAAAGAGTTGTATTATTGATTGGGAAGTTAGGCCTGGAGGCTTATTAGTTCAAAAAAGAGTTGGAATTTCTGCTGAGGAAAATTCTGTTGCTGGTCCTATGATCAAGATCAAAGTCTCTTATGATTCTTGTTACCATGATGTTGTTGTTCCTGCTGAATCAACATTTGGGAACTTGAAGAAAATTCTTTGGGACACAACTGGTTTACATCCTAATGTTCAGAGATTATTGTTCCAAGGAAAAGAAAAGGATGAGAAGGAATGCTTACACATTTCTGGTGTAAAAGATATGTCAAAGGTGATC…	GEKMRKKSSTSSKSKNEVIKDENYKYTEFEEEKKSCIIDWEVRPGGLLVQKRVGISAEENSVAGPMIKIKVSYDSCYHDVVVPAESTFGNLKKILWDTTGLHPNVQRLLFQGKEKDEKECLHISGVKDMSKVILMEDPASKELKKIQDTSISSQAIARVRVEVDKLSHRVVSIEEAVQRGTKVEDKEFVVLTELFMIQLLTLDGIEAEGEARTQRRKEVHRIQSFVDMIDNFKARNSSIVSNCIGTISMVNTKWEKFDSGIGSLNAPNQSPKVTQEWEVFD
	Solyc06g035720	Chr6	SlBAG6	22576452	22579836	4	GTTTAGTTGAAAATATGTAATAATCATTCTTCCAAGTGTTTAGATTGGATTCTATAATCAACCAAACAATCATTAGTGCACATAAAGTGATTAGTATTGTACTTACTGCATATACTACATGTCACCTGTCCTCCTATTTAACGTAAGTTTTTAGTTTTCCTATTTTTCATATATCTTACACGCTTTATTCACAAGGCTCCCTTGCCTGCCTTCTTTTTTTTTTTTTAAAAAAAAAAGAAACAAAATCTCCAGCAGAGTTTTCTACTTTTTTCTTTCTGTTTCTCTTTCCACTCATTTATTTATTTATACATATATATTTTTGAAGTATCTTATTATTTCATCTCTTTCTTCTCAAAAAAAAAAAAAAAACAGAATAGCCAGCAAATTAGTTAGTCAGTG…	ATGATGGGAATGAAGACCAGAACTACCGGAATGCCGCCAATAATGAACGGTGGTTCTGTTGGCAGCGAAAATGAGTGGGAGCTGAGGCCCAGTGGAATGCTGGTTCAGAAACGCAACCTGGATTCTGAAAATCGTCGTCCTCCTCCTACTATTCGGGTCCGGGTCAAGTATCGCTCTGTTAACCATGAGATCAATATCAGTTCTCAAGCAACCTTTGGAGAATTGAAGAAGATGTTGAGCGGTCCAACTGGGTTGCATCACGAAGATCAGAAGTTACTGTATAAAGACAAAGAAAGGGAAAATAAAACATTTCTTGATATCGCTGGCGTGAAGGATAAGTCCAAAATTGTTCTAATTGAAGATCCAATTAGCCAAGAAAAACGGTATCTCGAGATGAGA…	MMGMKTRTTGMPPIMNGGSVGSENEWELRPSGMLVQKRNLDSENRRPPPTIRVRVKYRSVNHEINISSQATFGELKKMLSGPTGLHHEDQKLLYKDKERENKTFLDIAGVKDKSKIVLIEDPISQEKRYLEMRKNAKVEKAAKTISDISLEVDRLARQVSALESVVSKGGKVVEKDVINLTELLMNQLLQLDGIIAEGDIKLQRKNQVRKVQKCVETLDVLKIKNSMPTNNGNHTPKDQSPPARPHQDYMYLNEQASSPVQQHQDRHSFRNSPVQSKQQHQSRHSTSGSVVITTQWETFDSTPAPLLDHFSSPTTTSSTHAAVAQSRISWDLL
	Solyc06g072430	Chr6	SlBAG7	42348467	42349589	1	ATGGAGTATCCATTATACGGAAGCTATTGGCCCCAGTCAGCTCGCCCTGGCTATTCCTCAAACATGAGAGGAATTCCAGTGCAATCGATTCACCAGAAACCTGCCGGAATCAAGCAGGCCTCCAAGGTTGTTCAGATTCCGGTCCATTTCGTTAGTTCGGATCCCGAGCGGTCCGTTTTGGCCTCGGCGACAAAGAAACCTGAGCCGGATAGGTCCGGTTCAGCGTTGAAGATCCAGAAGGTATTCAGAGGCTTTTTGGTGAGAAAAAGCGTGAAGAAAATCAAGTTGATACGAAAAGAGGTGGAAGATGTTGAGCGGAAGCTTTTGTGTAGAGAAACGGCGGAGTTGATTTGTAGAGATGAAAGGGAAAGGTTGCGGGTGAATGAGACGCTGATGTCT…	ATGGAGTATCCATTATACGGAAGCTATTGGCCCCAGTCAGCTCGCCCTGGCTATTCCTCAAACATGAGAGGAATTCCAGTGCAATCGATTCACCAGAAACCTGCCGGAATCAAGCAGGCCTCCAAGGTTGTTCAGATTCCGGTCCATTTCGTTAGTTCGGATCCCGAGCGGTCCGTTTTGGCCTCGGCGACAAAGAAACCTGAGCCGGATAGGTCCGGTTCAGCGTTGAAGATCCAGAAGGTATTCAGAGGCTTTTTGGTGAGAAAAAGCGTGAAGAAAATCAAGTTGATACGAAAAGAGGTGGAAGATGTTGAGCGGAAGCTTTTGTGTAGAGAAACGGCGGAGTTGATTTGTAGAGATGAAAGGGAAAGGTTGCGGGTGAATGAGACGCTGATGTCT…	MEYPLYGSYWPQSARPGYSSNMRGIPVQSIHQKPAGIKQASKVVQIPVHFVSSDPERSVLASATKKPEPDRSGSALKIQKVFRGFLVRKSVKKIKLIRKEVEDVERKLLCRETAELICRDERERLRVNETLMSLLFKLDSIRGVDSGVRECRKAVIRKAIYLQEKVDCIVAAANQIAAEEENQSDELSEPVNQTGDIPNSTGKQDEDGKLTNQNELCHLSEQSVDVETQAASNDEKTPIEGEHDVAPLNEKRGGLQEVKQETDCPMLECVEESVERGEVGDLIEVVEDVNENENENETRSHKFEGGEESRRNRELLEKMVEKNENMMRMMTELCHKNELQTRMLNSLAQRVDQLEKTFLCDRLKTKKKKRHTA
	Solyc08g080320	Chr8	SlBAG8	61751769	61754090	4	TGGGTCAGAATCTTTTGTGGTTTTTTTCCTTTTCTTCATTCATGGGGTTGTTCTTAGCTTAGCAGACAAGCACTTAAAAAAAGAACAAATTTTTAATTTTTATTTTTTCAACTTTTGACATTTCTTGATAAATTGGCTTTGAATTTTTCATTATGAGTAGTAAAGAGTTGTTGAGAATGAAAACTAAAAAGGCAAATGGGAATGGAGTTTCATCATCAGGATGGGAAATGAGGCCAGGAGGAATGTTAGTACAAAAGAGAAGTTCTGATCATAATTCAAATCAAAGTTCAAATATTGTTGTTCCAATTATTAGACTCAAAGTTAAATATGGTTCATCTTATCATGAAGTCAAAATTAGCTCACAAGCAACTTTTGGTAATTTTTGATAATTTTTTTTTT…	ATGAGTAGTAAAGAGTTGTTGAGAATGAAAACTAAAAAGGCAAATGGGAATGGAGTTTCATCATCAGGATGGGAAATGAGGCCAGGAGGAATGTTAGTACAAAAGAGAAGTTCTGATCATAATTCAAATCAAAGTTCAAATATTGTTGTTCCAATTATTAGACTCAAAGTTAAATATGGTTCATCTTATCATGAAGTCAAAATTAGCTCACAAGCAACTTTTGGGGAGTTGAAGAAAATGTTGGCAGGGCCAACTGGATTACATACTGAAGATCAGAAAATATTTTACAAGGAAAAAGAAAAAGATTCTAGAAATTTTCTTGATGTTTCTGGTATAAAAGATGGATCAAAGCTTGTACTAATTGAAGATGAAATAAGCAGAGAAAAAAGGTATCTTGAA…	MSSKELLRMKTKKANGNGVSSSGWEMRPGGMLVQKRSSDHNSNQSSNIVVPIIRLKVKYGSSYHEVKISSQATFGELKKMLAGPTGLHTEDQKIFYKEKEKDSRNFLDVSGIKDGSKLVLIEDEISREKRYLESRRNAKMENASKEITSIRLEIDKLAKQVANVEMDIYGGKKVTETLLLSLIEMLMTQLIKLDGITADGDLKLQRRMQVKRVQKYIETLDMLKIRNSTLGNDNAKVSMKHKNRIFTGQMAKSIYYQQEQRKMGNFADEKSPGPVVVTTKWETF
	Solyc10g084170	Chr10	SlBAG9	62988574	62989087	1	ATGGAGAATCTCTTCAATTGGTCCCAGCCAGCTCGCCGTCGCTATTCCTCGAGAGGAAAACCAGTACAATCGGTCCACGAGAAATCTGCCGGAATAAAGCCGGCAACGAAGGTCGTTCAGATTCCGGTCCACTCCGTCAGTTCCGATCCAGATCGGTCACAGAAACCTGATGAGTTGGCGCAGGCGGAGGCGCCTGATAGAAGATCTGCTTCAGCGTTAAGGATCCAGAAGGTATTTCGTGGTTATATGGTGAGGAAAAACGTGAAGAGAATTATGTCAATACGAAGAGAGGTGGATGAGATTGAACGGAAGCTTTTATTCGGCGAAACGGCGGAGTTGATTCGGAGAGACGAAAGGGAAAGGGTACGGGTGAATGAAACGTTAATGTCTCTGCTTTTC…	ATGGAGAATCTCTTCAATTGGTCCCAGCCAGCTCGCCGTCGCTATTCCTCGAGAGGAAAACCAGTACAATCGGTCCACGAGAAATCTGCCGGAATAAAGCCGGCAACGAAGGTCGTTCAGATTCCGGTCCACTCCGTCAGTTCCGATCCAGATCGGTCACAGAAACCTGATGAGTTGGCGCAGGCGGAGGCGCCTGATAGAAGATCTGCTTCAGCGTTAAGGATCCAGAAGGTATTTCGTGGTTATATGGTGAGGAAAAACGTGAAGAGAATTATGTCAATACGAAGAGAGGTGGATGAGATTGAACGGAAGCTTTTATTCGGCGAAACGGCGGAGTTGATTCGGAGAGACGAAAGGGAAAGGGTACGGGTGAATGAAACGTTAATGTCTCTGCTTTTC…	MENLFNWSQPARRRYSSRGKPVQSVHEKSAGIKPATKVVQIPVHSVSSDPDRSQKPDELAQAEAPDRRSASALRIQKVFRGYMVRKNVKRIMSIRREVDEIERKLLFGETAELIRRDERERVRVNETLMSLLFKLDSIRGIDSGVRECRKGVIKKAISLQENVDSIVSGS
	Solyc10g085290	Chr10	SlBAG10	63673488	63678316	5	TTTATCCGTACTTAGCACAGTTCCCTAGGTCTCTTGTACTTCCCCTTTGTCGTCTCCCTTTCTCAAATAATCTTCAAATTGTTACTGGTATCAATCTCTGTTGTGGAAGATCGATAATCCATCTCCGATTTGGGGATGAAAGAGTCAATCAATAGCAGTACCAGTTGCGGCGATGAAGCTGCTTGGGAAATTAGACCGAGCGGCATGCTTGTTCAGAAGAGAGAAAACGATGCTGCCGCTAATCCCACTATAATCATCAAGGTCTCGTATGCTTCTCAAGAATTTGACCTTCCTGTGCCACCTGAACTCACTTTTGGTAATATTCTCCCCTCATTTAGTGATTTTCAGCAAATTTTTTGGTTATATTTCGTGGTCGAAAGGATAGGGATTGTCCAGTTT…	ATGAAAGAGTCAATCAATAGCAGTACCAGTTGCGGCGATGAAGCTGCTTGGGAAATTAGACCGAGCGGCATGCTTGTTCAGAAGAGAGAAAACGATGCTGCCGCTAATCCCACTATAATCATCAAGGTCTCGTATGCTTCTCAAGAATTTGACCTTCCTGTGCCACCTGAACTCACTTTTGGTGAAGTAAAAAGTATCCTTTCCTCAATAATCGGTTTGGAGCCTAAGCTGCAAAAACTTCTATTCCGGGGAAAAGAAAAAGAAGATCATGAATATCTGCACTTGGTTGGTGTGAAAGACAATTCCAAAGTGTTAGTTATGGAGGAAGAAATGGTTGAGGAAAAAATTCCTGAAGAGGTTAGGGTTACCACTGAAATATCAAGAGGAGCCGAAGCTGTT…	MKESINSSTSCGDEAAWEIRPSGMLVQKRENDAAANPTIIIKVSYASQEFDLPVPPELTFGEVKSILSSIIGLEPKLQKLLFRGKEKEDHEYLHLVGVKDNSKVLVMEEEMVEEKIPEEVRVTTEISRGAEAVAEVRTEVDKLSEQVSAVQAVVFGGTNVEDKDIIHLTEMLMRQLLKLDGIEAAGEGRVQRKSEVRRVQNLVETLDAVKARNSNPFINNSNAVSVTTQWETFDSGVGSLNAPPPPRPVLEVGSINTPSPPRPVLGVGSMKASPPPRPAFGVGGLNTPPPPTPVLGVGRLNTPPPPTPVLAVGSMNAPSARPVLGVGSQTTPPLRPPTTIVTEDWEQFE
Carica papaya	evm.model.supercontig_2.421	supercontig_2	CpBAG1	4489407	4492335	4	ATGAAAAGATCATCACCTTCAAAATGCGTTGTTGTTAATCATGGGGTTCAGAGGGAGATAGAGTGGGAGCTCAGACCCGGTGGCATGCTTGTGCAGAAGAGAAATGCCGGGAATGCATCTGCTGGCCCCATGATCAAGATTAAGGTCTCCCATGGCTCTTATCACCATGAAATCACCGTCCCCGCTCAATCAACTTTTGGTAATCATCTTCCGTTCCCCAGCTCCCCCCTCCTTTCCGTGTTTTCTGGGTTTTTTTTTTGTGCTGAGATTTTGTGTAAGTTTTTGATCATTGGCTGAGAAGGTTTATAATACATATATATATATATATATATGTATATATCGATTCTCTTACACAAGCTCGATAGTACTCTGGTTTTCATGCTGGTGAATTGGTGTGTT…	ATGAAAAGATCATCACCTTCAAAATGCGTTGTTGTTAATCATGGGGTTCAGAGGGAGATAGAGTGGGAGCTCAGACCCGGTGGCATGCTTGTGCAGAAGAGAAATGCCGGGAATGCATCTGCTGGCCCCATGATCAAGATTAAGGTCTCCCATGGCTCTTATCACCATGAAATCACCGTCCCCGCTCAATCAACTTTTGGGGAATTAAAGAGGGTTCTTGCCAATGAGACTGGTTTGGAGCCCAAGGAACAGAGATTGTTATTTAGAGGCAAAGAAAAGGATGATGAAGAATTTTTGCACATGGTGGGCGTTAAAGATATGTCAAAAGTGATACTATTACAAGACCCAGCAAGCAAAGAGAGAAAGCTTGAGGAAATGAGGAGAAAGCAGAGTATAATG…	MKRSSPSKCVVVNHGVQREIEWELRPGGMLVQKRNAGNASAGPMIKIKVSHGSYHHEITVPAQSTFGELKRVLANETGLEPKEQRLLFRGKEKDDEEFLHMVGVKDMSKVILLQDPASKERKLEEMRRKQSIMKAYEAVAKVRAEVDKLTEKVIALEATVCRGTKVADKEFVILAEFFMVQLLKLDTIEADGEAKVQRRIEVRRIQSFVDRLDNLKARNSNPFSSNNNAVSVTTKWTTFESGVESLRASLHSSTRITQDWVMFD
	evm.model.supercontig_3.315	supercontig_3	CpBAG2	2197917	2202934	3	ATGAGCCGATTCAGGAGTATTGAGATCACAGACCCTTTCTTCCCTCCCGTCTTCACCAGAGAGATCTCCATTTTCGCGCCAAAATCCCTAGTTTTTCCCTCATTTGTGGAAGAAGAGCGCGATTTCAGCTTCGCTCTTGATCTCTTAAACCCCTGCCCTAACCCTGACCCCTTTCAACTCTTCGACACCGTCACTGATCTGATCCAAATTGAGCGAACGCCCTCGCTTTGCTCCTACAAGCGGATCCAGAAGCGGGCGGTGCCTGATTTTGCACTGCAAACACTATGCGACCGAGTGTCTGCGCTCGAATCGAAGTTCGACCGGCTTGTCAGCTCGAGGACCTGCGGCGTGAACCGAAAGTACACATGGACAGCTGAGATCGACGGGCCCGTTGAACGT…	ATGAGCCGATTCAGGAGTATTGAGATCACAGACCCTTTCTTCCCTCCCGTCTTCACCAGAGAGATCTCCATTTTCGCGCCAAAATCCCTAGTTTTTCCCTCATTTGTGGAAGAAGAGCGCGATTTCAGCTTCGCTCTTGATCTCTTAAACCCCTGCCCTAACCCTGACCCCTTTCAACTCTTCGACACCGTCACTGATCTGATCCAAATTGAGCGAACGCCCTCGCTTTGCTCCTACAAGCGGATCCAGAAGCGGGCGGTGCCTGATTTTGCACTGCAAACACTATGCGACCGAGTGTCTGCGCTCGAATCGAAGTTCGACCGGCTTGTCAGCTCGAGGACCTGCGGCGTGAACCGAAAGTACACATGGACAGCTGAGATCGACGGGCCCGTTGAACGT…	MSRFRSIEITDPFFPPVFTREISIFAPKSLVFPSFVEEERDFSFALDLLNPCPNPDPFQLFDTVTDLIQIERTPSLCSYKRIQKRAVPDFALQTLCDRVSALESKFDRLVSSRTCGVNRKYTWTAEIDGPVERKYKWTAEIKEGKKKKEDEEVVVVKKAPIGKKNYKWTAEIKGEKEDGGVSRTYTFKASSGDYANECTKLEKKEKKHKKKEKKEESETRVVEIEEGSPDHGVIVLRQAFAKRAGAIKNRKGKKKELSPQDAALTIQLTFRAYLIRRSKALRALRELAIAKTKLKEIRALFNNFSYRRRVSRDAEERQRFSEKIIVLLLTVDAIEGADVMVRAAKRSMVDELEAMLDVVDPQPLGKSLSMKRRTFDMPDSVIRKEIADGVAQVVQLLEG…
	evm.model.supercontig_14.156	supercontig_14	CpBAG3	1807510	1809048	2	ATGGCTTCTCGCCACCACCACTGTCATCTCAATCCTCTGCCCTGCACCACCACCAACCCATGCTCCTGCAACTGCAATTCCACTCCCTGCTGCAATCACTCTCAGCCTCACCACCCATCAACACCACAACTGGACCCTCTTCTTCATCTCCTTGCCTCTTATCTCCTCCAACAACACCCTCCTCATCAACCCCATCCTCATTCTTCGCTCGCAGACACGCGACGGACCCAGATGAGCGATCCTCCAAAACAGCGGTTCCATCAGCGGAGACAACAATTTTTTCAACAAGAAGATAAATGCTGGCCCCGACAACAAAACCCTTTTGATCTCTCTTCTCTTCTTCACCGGATAAACGCTCTCGAGTCCTCTCTCCACCATTTTTCTATTTCCCCGGATGAT…	ATGGCTTCTCGCCACCACCACTGTCATCTCAATCCTCTGCCCTGCACCACCACCAACCCATGCTCCTGCAACTGCAATTCCACTCCCTGCTGCAATCACTCTCAGCCTCACCACCCATCAACACCACAACTGGACCCTCTTCTTCATCTCCTTGCCTCTTATCTCCTCCAACAACACCCTCCTCATCAACCCCATCCTCATTCTTCGCTCGCAGACACGCGACGGACCCAGATGAGCGATCCTCCAAAACAGCGGTTCCATCAGCGGAGACAACAATTTTTTCAACAAGAAGATAAATGCTGGCCCCGACAACAAAACCCTTTTGATCTCTCTTCTCTTCTTCACCGGATAAACGCTCTCGAGTCCTCTCTCCACCATTTTTCTATTTCCCCGGATGAT…	MASRHHHCHLNPLPCTTTNPCSCNCNSTPCCNHSQPHHPSTPQLDPLLHLLASYLLQQHPPHQPHPHSSLADTRRTQMSDPPKQRFHQRRQQFFQQEDKCWPRQQNPFDLSSLLHRINALESSLHHFSISPDDRCAAPCSLRDVAARVIQTHFRAFLVRRSRTLRQLKELAVVKSSFTSLKSSVSNKTHFDFEAVSRKAMELLLKLDSIPGGDPMIRDGKRSISRDLIRFLEFIDGLASKRHHLLYKAAKNVRYVDNSGNKSRVLGTNYDGGRREIIEKLRGRVEKIRGFSWVSRNEDGEEDAEIEGFHQVMSDDEENPRISISGKSGLAKNGNRVPVKGHGGPSGVKKSVSFAENENMYRVFCNASSGDDNSTNSINGSDLSDDHGEMLENQCSEVEV…
	evm.model.supercontig_74.88	supercontig_74	CpBAG4	922093	923201	4	ATGGAGGCGAAGAAGAGTTCTGTTGGCTACTCGAATGCTGAGCATTTGGAGGTTAGGCCTGGAGGCATGCTAGTCCAGAAAAGGGGTTCGGATTCTCGTCTTCCAGTTCCCACCATTAAAGTCAAAGTCAAGTACGGCTCTCAGTCTCGACACATTTCTATCAGTTCTCAAGCCAGCTTCGGTAAATCCTATCTATCTTCCCTTTGTTTGACGAATCTGACTTGGTTTATTATTTTATATAGGTTTTTGTTGATGTGATTTTGAGTTGTGTTGCAGGGGAACTGAAGAAAATGCTTGCGGAACATACAGGGATACACCATGAGGAGCAGAAATTGATATATAAGAAAAAGGAGAGAGATTCCAAATCGTATTTAGATGTTGCAGGAGTCAAAGATGGAT…	ATGGAGGCGAAGAAGAGTTCTGTTGGCTACTCGAATGCTGAGCATTTGGAGGTTAGGCCTGGAGGCATGCTAGTCCAGAAAAGGGGTTCGGATTCTCGTCTTCCAGTTCCCACCATTAAAGTCAAAGTCAAGTACGGCTCTCAGTCTCGACACATTTCTATCAGTTCTCAAGCCAGCTTCGGGGAACTGAAGAAAATGCTTGCGGAACATACAGGGATACACCATGAGGAGCAGAAATTGATATATAAGAAAAAGGAGAGAGATTCCAAATCGTATTTAGATGTTGCAGGAGTCAAAGATGGATCTAAATTGTTGTTGGTTGAGGACATTGCCATTAGAGAAAAACGCTGCCTGGAGAAACTCAAGAATGCGAACATTGAAAAGACCTCCAAATCCTTG…	MEAKKSSVGYSNAEHLEVRPGGMLVQKRGSDSRLPVPTIKVKVKYGSQSRHISISSQASFGELKKMLAEHTGIHHEEQKLIYKKKERDSKSYLDVAGVKDGSKLLLVEDIAIREKRCLEKLKNANIEKTSKSLTNISSEVDKFAQQVTALEATASKGRKVSEVDVDNLTGILMTILVKLDELIVEGDLKLQKRTQEKRVQKYIENLDKLKLNNSVTSNKGDHSPLKKKEKEKEKENSVNQLQAKEKQRNLPLKQSGSFVITTRWETFE
	evm.model.supercontig_75.118	supercontig_75	CpBAG5	1075903	1076590	1	ATGAAACCCTCCAGAAAATTCAGCTTCGTCTCTTCTACTTCTTCTTCTTCTTCTTCAACCACGACTGTAACCTTCTCTGTCGACCATAACGACCAAACTATCCCCAAGCAAACCAAGCGAATTCCCATCCAGTCCCCTCCGTCGTCACCTAAAGCCTCAATTTCACCTCCTTGTCTTTCCCAATCTGAGGCCGCGGCAAGGATCCAATCCGCGTACCGGTGTCACGTTATCCGCAAACTCTACAAGAAAATCTCGGCCGTCGATCGCGAGGCTGATCAGCTGAAACGCTTGATCCAGCGGCAGGACACGGTGGATTCCATCAGGAGCGACGATCGCGAGAAGCTGAGGATGAACGAGGCTCTTATGAGTCTCCTTCTAAAGCTGGACTCAGTCCCGGGA…	ATGAAACCCTCCAGAAAATTCAGCTTCGTCTCTTCTACTTCTTCTTCTTCTTCTTCAACCACGACTGTAACCTTCTCTGTCGACCATAACGACCAAACTATCCCCAAGCAAACCAAGCGAATTCCCATCCAGTCCCCTCCGTCGTCACCTAAAGCCTCAATTTCACCTCCTTGTCTTTCCCAATCTGAGGCCGCGGCAAGGATCCAATCCGCGTACCGGTGTCACGTTATCCGCAAACTCTACAAGAAAATCTCGGCCGTCGATCGCGAGGCTGATCAGCTGAAACGCTTGATCCAGCGGCAGGACACGGTGGATTCCATCAGGAGCGACGATCGCGAGAAGCTGAGGATGAACGAGGCTCTTATGAGTCTCCTTCTAAAGCTGGACTCAGTCCCGGGA…	MKPSRKFSFVSSTSSSSSSTTTVTFSVDHNDQTIPKQTKRIPIQSPPSSPKASISPPCLSQSEAAARIQSAYRCHVIRKLYKKISAVDREADQLKRLIQRQDTVDSIRSDDREKLRMNEALMSLLLKLDSVPGVDPAVREARRKVSRRVVSLQEILDSIAEAKGYCYDAVVDDYEGDFYGWGPQGFGARKYWEETAEEEVCRETGGEEMENFCAQYLGFRCLQRFLRE
	evm.model.supercontig_96.31	supercontig_96	CpBAG6	462994	464215	1	ATGCAGAAAGTGCAAAGGACGCAATCCCCCAAGGTTGTGTCAATCCCAGTCCGCTTTGTCGAGTCTGAGCGGAGCAGGTCCGAATCGGCTGTGAAGATTCAGAAGGTTTTTAGGGGGTTTCTGGTGAGGAAAAGTGTGAAAAAGATCGCCGCAATAAGGAGAGAGGTCGAGGAGATTGAGAAGAAGGTTTCCAAGAAGGAGACAGTTGAGTTAATTCAGAAGGATTCCAAGGAACGACTGAGGGTGAATGAGACGTTGATGAGTCTGCTGTTCAGGTTGGATTCTGTGAGAGGTGTGGATTCCGGGGTTAGGGGTTGCAGGAAGGCCGTGATCAAGAAGGCAATCGCTTTGCAGGAAATCTTCGACGCTATTGCTGCTGGAAGCGAGACTGCAGGAGCT…	ATGCAGAAAGTGCAAAGGACGCAATCCCCCAAGGTTGTGTCAATCCCAGTCCGCTTTGTCGAGTCTGAGCGGAGCAGGTCCGAATCGGCTGTGAAGATTCAGAAGGTTTTTAGGGGGTTTCTGGTGAGGAAAAGTGTGAAAAAGATCGCCGCAATAAGGAGAGAGGTCGAGGAGATTGAGAAGAAGGTTTCCAAGAAGGAGACAGTTGAGTTAATTCAGAAGGATTCCAAGGAACGACTGAGGGTGAATGAGACGTTGATGAGTCTGCTGTTCAGGTTGGATTCTGTGAGAGGTGTGGATTCCGGGGTTAGGGGTTGCAGGAAGGCCGTGATCAAGAAGGCAATCGCTTTGCAGGAAATCTTCGACGCTATTGCTGCTGGAAGCGAGACTGCAGGAGCT…	MQKVQRTQSPKVVSIPVRFVESERSRSESAVKIQKVFRGFLVRKSVKKIAAIRREVEEIEKKVSKKETVELIQKDSKERLRVNETLMSLLFRLDSVRGVDSGVRGCRKAVIKKAIALQEIFDAIAAGSETAGAGMVEASSGVAVVDQIIEDKEEAELPTIDGPVDSTQTLLAQGNNPAMEHSASNIVSGNDSSSEFGVDEKVQFQNHIGSTLDCEELKGTPEALDNADKSPEANHSVDSSCENLINDMENGKDFSGTYDATESVEENLGSSEGESQLYSSSNSHNLVEEVEGKMGIHGEEGLAIVCPEKKEENVMSDCGADEGNAGNTNLLERMMKDNEKMMSLMTELFERNAMQTWLISSLSQRVEQLEKAFLCDKLRRKKKRQAACTVDAPHKFPDS…
	evm.model.supercontig_107.5	supercontig_107	CpBAG7	50742	52080	4	ATGATGAGAATGAATAATAAGACGAATGTCAGCTTCGTTGTTGGTGGTGACTCAGGGGCGCATGATTGGGAACTCAGACCAGGGGGAATGTTGGTACAGAAGCGAAACCCGGATTCAGATCGGAGTTCCGCATCCCCACCGACGATCAGAGTTAGAGTTAAATACGGGTCTATCTACCACGAAATCAACCTCAGTTCTCAAGCTACATTTGGTAAGCTGTACTGTTCCTCTTCCCGCAATTGTTTGTGTTTTCTTTGTCACTGGTTCTTATGGTCTAAACTATGAAAACATTGTTTTGGTACCCCTCGTTTTAACTCCTGCAGGTGAGTTGAAGAAATTGTTGACGGGGCCAACAGGGTTGCACCATCAAGACCAAAAGCTGATATACAAAGACAAGGA…	ATGATGAGAATGAATAATAAGACGAATGTCAGCTTCGTTGTTGGTGGTGACTCAGGGGCGCATGATTGGGAACTCAGACCAGGGGGAATGTTGGTACAGAAGCGAAACCCGGATTCAGATCGGAGTTCCGCATCCCCACCGACGATCAGAGTTAGAGTTAAATACGGGTCTATCTACCACGAAATCAACCTCAGTTCTCAAGCTACATTTGGTGAGTTGAAGAAATTGTTGACGGGGCCAACAGGGTTGCACCATCAAGACCAAAAGCTGATATACAAAGACAAGGAGAGGGATTCCAATGCATTTCTTGACATTGTCGGAGTCAAAGATCGATCTAAAATGGTGCTCATTGAGGACCCAATCAGTCAGGAGAAGCGGTTACTGGAACTGAGAAGAAAC…	MMRMNNKTNVSFVVGGDSGAHDWELRPGGMLVQKRNPDSDRSSASPPTIRVRVKYGSIYHEINLSSQATFGELKKLLTGPTGLHHQDQKLIYKDKERDSNAFLDIVGVKDRSKMVLIEDPISQEKRLLELRRNAKMEKASKSISDISLEVDRLAGQVSALETIITKGGKVAEKDVLNLIELLMNQLLKLDGIMADGDAKLQRKMQVRRVQKYVETLDLLKIKNSTPSSNGVQVPVQSQPRHPNGQRLAPSQVQSPRHSNGQREATIQEEQPRDSIGHLPFHQQYQHYPYQREKNSSSGPVVVTTKWETFDSTPASNPVPSTSTSTSSLATNNPKFSWEFFD
	evm.model.supercontig_120.29	supercontig_120	CpBAG8	402295	405069	4	ATGAACAATTTAAGTGGGAAAAATGAGGAGGCCGAGTGGGAGGTGAGGCCAGGTGGCATGCTCGTACAGAGAAGAGAAGAGAATGGACATGATCACCAAAACCATCATCATCGTCATCATCATCATGAAGCGGCTGCTAGTGGATCCACGATCAAAATCAACGTCTCTCATGGTCCTGCTCAGCATGAGGTCTCTCTTCCTGCGAACTCCACTTTCGGTAACTCTTCAATTTTATTAGAAGTTGTAGAATTTATCTTGTTCGAAACCCGAAATACTTCCTGCTACTGCACTTGTTTATTGTTAATTCCTCATGAGGCTTGAACGGCTTGTCCATTATTATATCCGAATTTTGGCACATATCTGGGTACCGATACGCGAGTGTTTCAATTTCTTAGTTGG…	ATGAACAATTTAAGTGGGAAAAATGAGGAGGCCGAGTGGGAGGTGAGGCCAGGTGGCATGCTCGTACAGAGAAGAGAAGAGAATGGACATGATCACCAAAACCATCATCATCGTCATCATCATCATGAAGCGGCTGCTAGTGGATCCACGATCAAAATCAACGTCTCTCATGGTCCTGCTCAGCATGAGGTCTCTCTTCCTGCGAACTCCACTTTCGGGGATGTGAAGAAAGTTATTGCACAAAAAACTGGGTTGGAGCCCGGAGTGCAGAAAATCTTGTTCCGGGGACAAGAGAAAGAAGACAATGAGGAGTTGCATACAGCTGGTGTGAAGGATAAGTCAAAAGTCTTGCTCTTGAAGGACCCAGAAAGTAAAGAGAAGAATGTTGAGCATTCAGAG…	MNNLSGKNEEAEWEVRPGGMLVQRREENGHDHQNHHHRHHHHEAAASGSTIKINVSHGPAQHEVSLPANSTFGDVKKVIAQKTGLEPGVQKILFRGQEKEDNEELHTAGVKDKSKVLLLKDPESKEKNVEHSEESEARSKALAAVAGVREEIDKLSERVAALEVAVNSGTKVVNEEFDMSAELLMRQLLKLDSIEAEGEAKMQRKAEVCRVQSFHDTLDNLKARNSNPVINSSKTVSLTTKWETFESGMGSLEAPPPATTSTKVTQDWEQFD
	evm.model.supercontig_184.9	supercontig_184	CpBAG9	78923	82629	2	ATGATGCCGGGTTACAGGTTCATGGATTCGTACCCTCACCAAATGAACCAAGTGCCGTTACCTCATTATTACTTTCCAGGTTTCGGAAATATTCCACCTCAGATGAGAGTGGATGCCTTCAGATGTCCCATGAAGGATGATATTTGGCCTACTGGAGGCAACCATGAACACATTCCATGTCATGGTTGTTGCAACCATGGATGCTCCCGAGACTGTTATGGTTTCAGGCCACCTTTCCCGGCAGTGCCATCTTTCAATGGCTATGGAAATTATTTCATGTATCCCCCTCCTTGTAATATCCCCACTTATTATGTTCCTCCACTCCACTTGTCAACAGAGCAGCCTCGGTATGAATATGAGAAGTATGTCCCGAATAACTATCATTGCTGTGGATGTCCT…	ATGATGCCGGGTTACAGGTTCATGGATTCGTACCCTCACCAAATGAACCAAGTGCCGTTACCTCATTATTACTTTCCAGGTTTCGGAAATATTCCACCTCAGATGAGAGTGGATGCCTTCAGATGTCCCATGAAGGATGATATTTGGCCTACTGGAGGCAACCATGAACACATTCCATGTCATGGTTGTTGCAACCATGGATGCTCCCGAGACTGTTATGGTTTCAGGCCACCTTTCCCGGCAGTGCCATCTTTCAATGGCTATGGAAATTATTTCATGTATCCCCCTCCTTGTAATATCCCCACTTATTATGTTCCTCCACTCCACTTGTCAACAGAGCAGCCTCGGTATGAATATGAGAAGTATGTCCCGAATAACTATCATTGCTGTGGATGTCCT…	MMPGYRFMDSYPHQMNQVPLPHYYFPGFGNIPPQMRVDAFRCPMKDDIWPTGGNHEHIPCHGCCNHGCSRDCYGFRPPFPAVPSFNGYGNYFMYPPPCNIPTYYVPPLHLSTEQPRYEYEKYVPNNYHCCGCPTHMCNQKSDGGVKIEEQEPEVEKRKNDFPLPVQTKGIPYPVAWVPPEYMQNQRLQKLLESEVTSPNDAKLKDIPKPPEREPKTWSGWIPYDINNLRPLTQDWKKNQSTQGEEKVRQFPFPIIWMPSYGKQQEDEKKGGGETNSAPKCADEQSSNFKCLPGKLIKADHEMDKSRKNEEISGNTADSGTQERTVKQKSIPVRQLDKHDEKDSNEDSNQKMKDVSGKLGEDNKKDKLNKPSEKSTRKGSSSPLKTSHLPPVCLRVDPLP…
CDS: coding DNA sequence

## Sheet: Table S4
Table S4 Cis-regulatory elements in promoter sequences of the CsBAG genes.
Gene name	Cis-elements	Sequence information	Binding position	Number of binding sites	DNA strand	Reported species	Description
CsBAG1	G-box	TACGTG	1583	6	-	Arabidopsis thaliana	cis-acting regulatory element involved in light responsiveness
CsBAG1	MSA-like	(T/C)C(T/C)AACGG(T/C)(T/C)A	268	8.5	+	Catharanthus roseus	cis-acting element involved in cell cycle regulation
CsBAG1	AuxRR-core	GGTCCAT	1706	7	+	Nicotiana tabacum	cis-acting regulatory element involved in auxin responsiveness
CsBAG1	W box	TTGACC	619	6	+	Arabidopsis thaliana
CsBAG1	W box	TTGACC	1733	6	-	Arabidopsis thaliana
CsBAG1	Myb	CAACTG	64	6	-	Arabidopsis thaliana
CsBAG1	Myb	TAACTG	776	6	-	Arabidopsis thaliana
CsBAG1	Myb	CAACTG	260	6	+	Arabidopsis thaliana
CsBAG1	Unnamed__4	CTCC	1290	4	+	Petroselinum hortense
CsBAG1	Unnamed__4	CTCC	1230	4	+	Petroselinum hortense
CsBAG1	Unnamed__4	CTCC	1032	4	+	Petroselinum hortense
CsBAG1	Unnamed__4	CTCC	1029	4	+	Petroselinum hortense
CsBAG1	Unnamed__4	CTCC	1008	4	+	Petroselinum hortense
CsBAG1	Unnamed__4	CTCC	1406	4	-	Petroselinum hortense
CsBAG1	Unnamed__4	CTCC	1544	4	-	Petroselinum hortense
CsBAG1	Unnamed__4	CTCC	444	4	+	Petroselinum hortense
CsBAG1	Unnamed__4	CTCC	432	4	+	Petroselinum hortense
CsBAG1	Unnamed__4	CTCC	426	4	+	Petroselinum hortense
CsBAG1	Unnamed__4	CTCC	1762	4	-	Petroselinum hortense
CsBAG1	Unnamed__4	CTCC	1822	4	-	Petroselinum hortense
CsBAG1	Unnamed__4	CTCC	1961	4	-	Petroselinum hortense
CsBAG1	CGTCA-motif	CGTCA	1386	5	+	Hordeum vulgare	cis-acting regulatory element involved in the MeJA-responsiveness
CsBAG1	CGTCA-motif	CGTCA	1740	5	-	Hordeum vulgare	cis-acting regulatory element involved in the MeJA-responsiveness
CsBAG1	STRE	AGGGG	187	5	-	Arabidopsis thaliana
CsBAG1	STRE	AGGGG	710	5	-	Arabidopsis thaliana
CsBAG1	STRE	AGGGG	770	5	-	Arabidopsis thaliana
CsBAG1	STRE	AGGGG	1015	5	-	Arabidopsis thaliana
CsBAG1	STRE	AGGGG	344	5	+	Arabidopsis thaliana
CsBAG1	STRE	AGGGG	338	5	+	Arabidopsis thaliana
CsBAG1	STRE	AGGGG	178	5	+	Arabidopsis thaliana
CsBAG1	CCAAT-box	CAACGG	1375	6	+	Hordeum vulgare	MYBHv1 binding site
CsBAG1	TATA	TATAAAAT	55	8	-	Arabidopsis thaliana
CsBAG1	as-1	TGACG	611	5	-	Arabidopsis thaliana
CsBAG1	as-1	TGACG	257	5	+	Arabidopsis thaliana
CsBAG1	TCA	TCATCTTCAT	16	9	+	Pisum sativum
CsBAG1	A-box	CCGTCC	649	6	-	Petroselinum crispum	cis-acting regulatory element
CsBAG1	A-box	CCGTCC	1508	6	-	Petroselinum crispum	cis-acting regulatory element
CsBAG1	AAGAA-motif	GAAAGAA	724	7	+	Avena sativa
CsBAG1	AAGAA-motif	GAAAGAA	318	7	+	Avena sativa
CsBAG1	Box 4	ATTAAT	1955	6	+	Petroselinum crispum	part of a conserved DNA module involved in light responsiveness
CsBAG1	AE-box	AGAAACAA	850	8	+	Arabidopsis thaliana	part of a module for light response
CsBAG1	MYB	CAACCA	1988	6	+	Arabidopsis thaliana
CsBAG1	MYB	CAACAG	145	6	-	Arabidopsis thaliana
CsBAG1	MYB	CAACCA	1796	6	+	Arabidopsis thaliana
CsBAG1	MYB	CAACCA	256	6	-	Arabidopsis thaliana
CsBAG1	MYB	CAACCA	1489	6	+	Arabidopsis thaliana
CsBAG1	MYB	CAACAG	1048	6	+	Arabidopsis thaliana
CsBAG1	MYB recognition site	CCGTTG	621	6	-	Arabidopsis thaliana
CsBAG1	MBS	CAACTG	64	6	-	Arabidopsis thaliana	MYB binding site involved in drought-inducibility
CsBAG1	MBS	CAACTG	260	6	+	Arabidopsis thaliana	MYB binding site involved in drought-inducibility
CsBAG1	Unnamed__1	CGTGG	636	5	-	Zea mays
CsBAG1	Unnamed__1	CGTGG	1905	5	-	Zea mays
CsBAG1	ABRE	ACGTG	1838	5	+	Arabidopsis thaliana	cis-acting element involved in the abscisic acid responsiveness
CsBAG1	ABRE	ACGTG	1583	5	-	Arabidopsis thaliana	cis-acting element involved in the abscisic acid responsiveness
CsBAG1	Myb-binding site	CAACAG	145	6	-	Nicotiana tabacum
CsBAG1	Myb-binding site	CAACAG	1048	6	+	Nicotiana tabacum
CsBAG1	ABRE4	CACGTA	413	6	+	Zea mays
CsBAG1	GA-motif	ATAGATAA	1436	8	+	Arabidopsis thaliana	part of a light responsive element
CsBAG1	GC-motif	CCCCCG	1595	6	-	Zea mays	enhancer-like element involved in anoxic specific inducibility
CsBAG1	ARE	AAACCA	863	6	+	Zea mays	cis-acting regulatory element essential for the anaerobic induction
CsBAG1	ARE	AAACCA	1630	6	-	Zea mays	cis-acting regulatory element essential for the anaerobic induction
CsBAG1	ARE	AAACCA	30	6	+	Zea mays	cis-acting regulatory element essential for the anaerobic induction
CsBAG1	GARE-motif	TCTGTTG	948	7	-	Brassica oleracea	gibberellin-responsive element
CsBAG1	P-box	CCTTTTG	614	7	-	Oryza sativa	gibberellin-responsive element
CsBAG1	MYC	CATGTG	1703	6	+	Arabidopsis thaliana
CsBAG1	MYC	CATGTG	1624	6	+	Arabidopsis thaliana
CsBAG1	MYC	CATTTG	1523	6	+	Arabidopsis thaliana
CsBAG1	MYC	CAATTG	1506	6	+	Arabidopsis thaliana
CsBAG1	MYC	CATGTG	1418	6	+	Arabidopsis thaliana
CsBAG1	MYC	CATTTG	1162	6	+	Arabidopsis thaliana
CsBAG1	ABRE3a	TACGTG	1583	6	-	Zea mays
CsBAG1	C-box	ACGAGCACCGCC	650	11	-	Hordeum vulgare	cis-acting regulatory element involved in light responsiveness
CsBAG1	WRE3	CCACCT	1402	6	-	Pisum sativum
CsBAG1	WRE3	CCACCT	440	6	+	Pisum sativum
CsBAG1	WRE3	CCACCT	1644	6	-	Pisum sativum
CsBAG1	WUN-motif	CAATTACAT	305	9	-	Nicotiana glutinosa
CsBAG1	WUN-motif	AAATTACT	512	8	-	Nicotiana glutinosa
CsBAG2	Box 4	ATTAAT	1655	6	+	Petroselinum crispum	part of a conserved DNA module involved in light responsiveness
CsBAG2	Box 4	ATTAAT	1498	6	+	Petroselinum crispum	part of a conserved DNA module involved in light responsiveness
CsBAG2	Box 4	ATTAAT	1295	6	+	Petroselinum crispum	part of a conserved DNA module involved in light responsiveness
CsBAG2	Box 4	ATTAAT	1124	6	-	Petroselinum crispum	part of a conserved DNA module involved in light responsiveness
CsBAG2	Box 4	ATTAAT	1406	6	-	Petroselinum crispum	part of a conserved DNA module involved in light responsiveness
CsBAG2	AAGAA-motif	GAAAGAA	1500	7	-	Avena sativa
CsBAG2	ATCT-motif	AATCTAATCC	1627	9	+	Pisum sativum	part of a conserved DNA module involved in light responsiveness
CsBAG2	MYB recognition site	CCGTTG	1053	6	-	Arabidopsis thaliana
CsBAG2	MYB	CAACCA	1859	6	+	Arabidopsis thaliana
CsBAG2	MYB	TAACCA	679	6	+	Arabidopsis thaliana
CsBAG2	MYB	CAACCA	297	6	+	Arabidopsis thaliana
CsBAG2	TC-rich repeats	GTTTTCTTAC	1080	9	+	Nicotiana tabacum	cis-acting element involved in defense and stress responsiveness
CsBAG2	as-1	TGACG	829	5	-	Arabidopsis thaliana
CsBAG2	as-1	TGACG	1050	5	-	Arabidopsis thaliana
CsBAG2	as-1	TGACG	1917	5	-	Arabidopsis thaliana
CsBAG2	ERE	ATTTTAAA	697	8	+	Nicotiana glutinos
CsBAG2	TCA	TCATCTTCAT	1074	9	+	Pisum sativum
CsBAG2	CGTCA-motif	CGTCA	1168	5	+	Hordeum vulgare	cis-acting regulatory element involved in the MeJA-responsiveness
CsBAG2	CGTCA-motif	CGTCA	947	5	+	Hordeum vulgare	cis-acting regulatory element involved in the MeJA-responsiveness
CsBAG2	CGTCA-motif	CGTCA	80	5	+	Hordeum vulgare	cis-acting regulatory element involved in the MeJA-responsiveness
CsBAG2	Unnamed__4	CTCC	1884	4	+	Petroselinum hortense
CsBAG2	Unnamed__4	CTCC	196	4	-	Petroselinum hortense
CsBAG2	Unnamed__4	CTCC	240	4	-	Petroselinum hortense
CsBAG2	Unnamed__4	CTCC	1641	4	+	Petroselinum hortense
CsBAG2	Unnamed__4	CTCC	1609	4	+	Petroselinum hortense
CsBAG2	Unnamed__4	CTCC	1582	4	+	Petroselinum hortense
CsBAG2	Unnamed__4	CTCC	455	4	-	Petroselinum hortense
CsBAG2	Unnamed__4	CTCC	1536	4	+	Petroselinum hortense
CsBAG2	Unnamed__4	CTCC	736	4	-	Petroselinum hortense
CsBAG2	Unnamed__4	CTCC	693	4	+	Petroselinum hortense
CsBAG2	Unnamed__4	CTCC	242	4	+	Petroselinum hortense
CsBAG2	Unnamed__4	CTCC	45	4	+	Petroselinum hortense
CsBAG2	Unnamed__4	CTCC	1958	4	-	Petroselinum hortense
CsBAG2	MYB-like sequence	TAACCA	679	6	+	Arabidopsis thaliana
CsBAG2	W box	TTGACC	865	6	+	Arabidopsis thaliana
CsBAG2	CCAAT-box	CAACGG	943	6	+	Hordeum vulgare	MYBHv1 binding site
CsBAG2	STRE	AGGGG	583	5	-	Arabidopsis thaliana
CsBAG2	STRE	AGGGG	1832	5	-	Arabidopsis thaliana
CsBAG2	O2-site	GATGA(C/T)(A/G)TG(A/G)	1055	8	+	Zea mays	cis-acting regulatory element involved in zein metabolism regulation
CsBAG2	G-box	GCCACGTGGA	1612	9	-	Arabidopsis thaliana	cis-acting regulatory element involved in light responsiveness
CsBAG2	G-box	CACGTG	1614	6	-	Arabidopsis thaliana	cis-acting regulatory element involved in light responsiveness
CsBAG2	G-box	TAACACGTAG	250	9	+	Brassica oleracea	cis-acting regulatory element involved in light responsiveness
CsBAG2	G-box	TACGTG	1745	6	-	Arabidopsis thaliana	cis-acting regulatory element involved in light responsiveness
CsBAG2	AuxRR-core	GGTCCAT	898	7	+	Nicotiana tabacum	cis-acting regulatory element involved in auxin responsiveness
CsBAG2	AAAC-motif	CAATCAAAACCT	1626	11	+	Spinacia oleracea	light responsive element
CsBAG2	ABRE3a	TACGTG	1745	6	-	Zea mays
CsBAG2	MYC	CATTTG	465	6	-	Arabidopsis thaliana
CsBAG2	MYC	CATTTG	769	6	-	Arabidopsis thaliana
CsBAG2	MYC	CATTTG	741	6	+	Arabidopsis thaliana
CsBAG2	Unnamed__6	taTAAATATct	1217	11	-	Zea mays
CsBAG2	DRE core	GCCGAC	1694	6	-	Arabidopsis thaliana
CsBAG2	DRE core	GCCGAC	1861	6	-	Arabidopsis thaliana
CsBAG2	GT1-motif	GGTTAA	1687	6	-	Arabidopsis thaliana	light responsive element
CsBAG2	Sp1	GGGCGG	1672	6	+	Oryza sativa	light responsive element
CsBAG2	ABRE4	CACGTA	251	6	+	Zea mays
CsBAG2	LTR	CCGAAA	351	6	-	Hordeum vulgare	cis-acting element involved in low-temperature responsiveness
CsBAG2	Unnamed__1	CGTGG	302	5	-	Zea mays
CsBAG2	Unnamed__1	CGTGG	1613	5	-	Zea mays
CsBAG2	Unnamed__1	CGTGG	1702	5	-	Zea mays
CsBAG2	G-Box	CACGTG	1614	6	-	Pisum sativum	cis-acting regulatory element involved in light responsiveness
CsBAG2	TCT-motif	TCTTAC	841	6	+	Arabidopsis thaliana	part of a light responsive element
CsBAG2	ABRE	GACACGTGGC	1612	9	-	Triticum aestivum	cis-acting element involved in the abscisic acid responsiveness
CsBAG2	ABRE	CACGTG	1614	6	-	Arabidopsis thaliana	cis-acting element involved in the abscisic acid responsiveness
CsBAG2	ABRE	ACGTG	382	5	+	Arabidopsis thaliana	cis-acting element involved in the abscisic acid responsiveness
CsBAG2	ABRE	ACGTG	1745	5	-	Arabidopsis thaliana	cis-acting element involved in the abscisic acid responsiveness
CsBAG3	MYC	CATTTG	1926	6	+	Arabidopsis thaliana
CsBAG3	MYC	CATTTG	259	6	-	Arabidopsis thaliana
CsBAG3	MYC	CATGTG	1686	6	+	Arabidopsis thaliana
CsBAG3	MYC	CATGTG	620	6	-	Arabidopsis thaliana
CsBAG3	MYC	CAATTG	1264	6	+	Arabidopsis thaliana
CsBAG3	MYC	CATTTG	1349	6	-	Arabidopsis thaliana
CsBAG3	MYC	CATTTG	215	6	+	Arabidopsis thaliana
CsBAG3	WRE3	CCACCT	1692	6	+	Pisum sativum
CsBAG3	WRE3	CCACCT	798	6	-	Pisum sativum
CsBAG3	LAMP-element	CTTTATCA	574	8	-	Pisum sativum	part of a light responsive element
CsBAG3	LAMP-element	CTTTATCA	1114	8	-	Pisum sativum	part of a light responsive element
CsBAG3	ARE	AAACCA	1741	6	+	Zea mays	cis-acting regulatory element essential for the anaerobic induction
CsBAG3	ARE	AAACCA	887	6	-	Zea mays	cis-acting regulatory element essential for the anaerobic induction
CsBAG3	TCA-element	TCAGAAGAGG	1055	9	+	Brassica oleracea	cis-acting element involved in salicylic acid responsiveness
CsBAG3	F-box	CTATTCTCATT	839	10	-	Lycopersicon esculentum
CsBAG3	F-box	CTATTCTCATT	962	10	-	Lycopersicon esculentum
CsBAG3	LTR	CCGAAA	282	6	+	Hordeum vulgare	cis-acting element involved in low-temperature responsiveness
CsBAG3	MBS	CAACTG	48	6	+	Arabidopsis thaliana	MYB binding site involved in drought-inducibility
CsBAG3	Unnamed__1	CGTGG	253	5	+	Zea mays
CsBAG3	TCT-motif	TCTTAC	1470	6	-	Arabidopsis thaliana	part of a light responsive element
CsBAG3	TCT-motif	TCTTAC	1755	6	-	Arabidopsis thaliana	part of a light responsive element
CsBAG3	AAGAA-motif	GAAAGAA	453	7	-	Avena sativa
CsBAG3	AAGAA-motif	gGTAAAGAAA	877	9	+	Avena sativa
CsBAG3	AAGAA-motif	GAAAGAA	279	7	+	Avena sativa
CsBAG3	MYB	CAACCA	1591	6	+	Arabidopsis thaliana
CsBAG3	MYB	CAACCA	423	6	-	Arabidopsis thaliana
CsBAG3	MYB	CAACCA	1368	6	+	Arabidopsis thaliana
CsBAG3	MYB	CAACCA	1064	6	-	Arabidopsis thaliana
CsBAG3	I-box	cCATATCCAAT	1266	10	+	Flaveria trinervia	part of a light responsive element
CsBAG3	I-box	AAGATAAGGCT	662	10	+	Gossypium hirsutum	part of a light responsive element
CsBAG3	I-box	cGATAAGGCG	662	9	+	Zea mays	part of a light responsive element
CsBAG3	TC-rich repeats	GTTTTCTTAC	1716	9	-	Nicotiana tabacum	cis-acting element involved in defense and stress responsiveness
CsBAG3	CARE	CAACTCCC	1438	8	-	Oryza sativa
CsBAG3	as-1	TGACG	670	5	+	Arabidopsis thaliana
CsBAG3	TCA	TCATCTTCAT	930	9	-	Pisum sativum
CsBAG3	TCA	TCATCTTCAT	1107	9	-	Pisum sativum
CsBAG3	TGACG-motif	TGACG	670	5	+	Hordeum vulgare	cis-acting regulatory element involved in the MeJA-responsiveness
CsBAG3	Unnamed__4	CTCC	1894	4	+	Petroselinum hortense
CsBAG3	Unnamed__4	CTCC	200	4	-	Petroselinum hortense
CsBAG3	Unnamed__4	CTCC	1663	4	+	Petroselinum hortense
CsBAG3	Unnamed__4	CTCC	1500	4	+	Petroselinum hortense
CsBAG3	Unnamed__4	CTCC	1467	4	+	Petroselinum hortense
CsBAG3	Unnamed__4	CTCC	1464	4	+	Petroselinum hortense
CsBAG3	Unnamed__4	CTCC	553	4	-	Petroselinum hortense
CsBAG3	Unnamed__4	CTCC	667	4	-	Petroselinum hortense
CsBAG3	Unnamed__4	CTCC	805	4	-	Petroselinum hortense
CsBAG3	Unnamed__4	CTCC	811	4	-	Petroselinum hortense
CsBAG3	Unnamed__4	CTCC	1027	4	-	Petroselinum hortense
CsBAG3	Unnamed__4	CTCC	1183	4	-	Petroselinum hortense
CsBAG3	Unnamed__4	CTCC	1207	4	-	Petroselinum hortense
CsBAG3	Unnamed__4	CTCC	723	4	+	Petroselinum hortense
CsBAG3	Unnamed__4	CTCC	1357	4	-	Petroselinum hortense
CsBAG3	Unnamed__4	CTCC	1411	4	-	Petroselinum hortense
CsBAG3	Unnamed__4	CTCC	1439	4	-	Petroselinum hortense
CsBAG3	Unnamed__4	CTCC	539	4	+	Petroselinum hortense
CsBAG3	Unnamed__4	CTCC	507	4	+	Petroselinum hortense
CsBAG3	Unnamed__4	CTCC	483	4	+	Petroselinum hortense
CsBAG3	Unnamed__4	CTCC	411	4	+	Petroselinum hortense
CsBAG3	Unnamed__4	CTCC	1703	4	-	Petroselinum hortense
CsBAG3	Unnamed__4	CTCC	1804	4	-	Petroselinum hortense
CsBAG3	Unnamed__4	CTCC	188	4	+	Petroselinum hortense
CsBAG3	Myb	TAACTG	154	6	+	Arabidopsis thaliana
CsBAG3	Myb	CAACTG	48	6	+	Arabidopsis thaliana
CsBAG3	CGTCA-motif	CGTCA	1327	5	-	Hordeum vulgare	cis-acting regulatory element involved in the MeJA-responsiveness
CsBAG3	STRE	AGGGG	1136	5	+	Arabidopsis thaliana
CsBAG3	STRE	AGGGG	1147	5	-	Arabidopsis thaliana
CsBAG3	STRE	AGGGG	817	5	+	Arabidopsis thaliana
CsBAG3	STRE	AGGGG	1578	5	-	Arabidopsis thaliana
CsBAG3	STRE	AGGGG	297	5	+	Arabidopsis thaliana
CsBAG3	STRE	AGGGG	55	5	+	Arabidopsis thaliana
CsBAG3	GTGGC-motif	GATTCTGTGGC	1305	10	+	Spinacia oleracea	part of a light responsive element
CsBAG3	G-box	CACGAC	387	6	-	Zea mays	cis-acting regulatory element involved in light responsiveness
CsBAG4.1	I-box	TGATAATGT	1836	9	+	Solanum tuberosum	part of a light responsive element
CsBAG4.1	MYB	TAACCA	1475	6	+	Arabidopsis thaliana
CsBAG4.1	MYB	TAACCA	779	6	+	Arabidopsis thaliana
CsBAG4.1	MYB	CAACCA	496	6	+	Arabidopsis thaliana
CsBAG4.1	MYB	TAACCA	1676	6	-	Arabidopsis thaliana
CsBAG4.1	Box 4	ATTAAT	1426	6	+	Petroselinum crispum	part of a conserved DNA module involved in light responsiveness
CsBAG4.1	Unnamed__2	CCCCGG	1534	6	+	Zea mays
CsBAG4.1	AAGAA-motif	gGTAAAGAAA	247	9	-	Avena sativa
CsBAG4.1	AAGAA-motif	GAAAGAA	1618	7	-	Avena sativa
CsBAG4.1	AAGAA-motif	GAAAGAA	1853	7	-	Avena sativa
CsBAG4.1	AE-box	AGAAACTT	1255	8	-	Arabidopsis thaliana	part of a module for light response
CsBAG4.1	AE-box	AGAAACAA	1638	8	-	Arabidopsis thaliana	part of a module for light response
CsBAG4.1	AE-box	AGAAACTT	105	8	+	Arabidopsis thaliana	part of a module for light response
CsBAG4.1	A-box	CCGTCC	986	6	+	Petroselinum crispum	cis-acting regulatory element
CsBAG4.1	ERE	ATTTCATA	1400	8	+	Nicotiana glutinos
CsBAG4.1	ERE	ATTTTAAA	702	8	-	Nicotiana glutinos
CsBAG4.1	ERE	ATTTTAAA	1216	8	+	Nicotiana glutinos
CsBAG4.1	ERE	ATTTTAAA	780	8	-	Nicotiana glutinos
CsBAG4.1	TCA	TCATCTTCAT	158	9	+	Pisum sativum
CsBAG4.1	3-AF3 binding site	CACTATCTAAC	360	10	-	Pisum sativum	part of a conserved DNA module array (CMA3)
CsBAG4.1	TATA	TATAAAAT	450	8	-	Arabidopsis thaliana
CsBAG4.1	STRE	AGGGG	913	5	-	Arabidopsis thaliana
CsBAG4.1	Unnamed__4	CTCC	53	4	-	Petroselinum hortense
CsBAG4.1	Unnamed__4	CTCC	1901	4	+	Petroselinum hortense
CsBAG4.1	Unnamed__4	CTCC	217	4	-	Petroselinum hortense
CsBAG4.1	Unnamed__4	CTCC	1625	4	+	Petroselinum hortense
CsBAG4.1	Unnamed__4	CTCC	544	4	-	Petroselinum hortense
CsBAG4.1	Unnamed__4	CTCC	990	4	+	Petroselinum hortense
CsBAG4.1	Unnamed__4	CTCC	1481	4	-	Petroselinum hortense
CsBAG4.1	Unnamed__4	CTCC	1555	4	-	Petroselinum hortense
CsBAG4.1	Unnamed__4	CTCC	228	4	+	Petroselinum hortense
CsBAG4.1	Unnamed__4	CTCC	77	4	+	Petroselinum hortense
CsBAG4.1	Unnamed__4	CTCC	19	4	+	Petroselinum hortense
CsBAG4.1	MYB-like sequence	TAACCA	1475	6	+	Arabidopsis thaliana
CsBAG4.1	MYB-like sequence	TAACCA	779	6	+	Arabidopsis thaliana
CsBAG4.1	MYB-like sequence	TAACCA	1676	6	-	Arabidopsis thaliana
CsBAG4.1	Myb	TAACTG	102	6	-	Arabidopsis thaliana
CsBAG4.1	Myb	TAACTG	1249	6	+	Arabidopsis thaliana
CsBAG4.1	Myb	CAACTG	464	6	+	Arabidopsis thaliana
CsBAG4.1	W box	TTGACC	1251	6	-	Arabidopsis thaliana
CsBAG4.1	AT-rich element	ATAGAAATCAA	644	10	-	Glycine max	binding site of AT-rich DNA binding protein (ATBP-1)
CsBAG4.1	G-box	TACGTG	1820	6	-	Arabidopsis thaliana	cis-acting regulatory element involved in light responsiveness
CsBAG4.1	ACE	CTAACGTATT	1612	9	+	Petroselinum crispum	cis-acting element involved in light responsiveness
CsBAG4.1	P-box	CCTTTTG	1653	7	+	Oryza sativa	gibberellin-responsive element
CsBAG4.1	ABRE3a	TACGTG	1820	6	-	Zea mays
CsBAG4.1	MYC	CAATTG	1958	6	+	Arabidopsis thaliana
CsBAG4.1	MYC	CATTTG	203	6	-	Arabidopsis thaliana
CsBAG4.1	MYC	CAATTG	1442	6	+	Arabidopsis thaliana
CsBAG4.1	MYC	CATGTG	951	6	+	Arabidopsis thaliana
CsBAG4.1	MYC	CATGTG	731	6	+	Arabidopsis thaliana
CsBAG4.1	MYC	CAATTG	1691	6	-	Arabidopsis thaliana
CsBAG4.1	ARE	AAACCA	1823	6	+	Zea mays	cis-acting regulatory element essential for the anaerobic induction
CsBAG4.1	ARE	AAACCA	232	6	-	Zea mays	cis-acting regulatory element essential for the anaerobic induction
CsBAG4.1	ARE	AAACCA	244	6	-	Zea mays	cis-acting regulatory element essential for the anaerobic induction
CsBAG4.1	LS7	CAGATTTATTTTTA	723	13	-	Zea mays	part of a light responsive element
CsBAG4.1	AT~TATA-box	TATATA	1843	6	-	Arabidopsis thaliana
CsBAG4.1	GT1-motif	GGTTAA	331	6	-	Arabidopsis thaliana	light responsive element
CsBAG4.1	ABRE4	CACGTA	176	6	+	Zea mays
CsBAG4.1	LTR	CCGAAA	1548	6	-	Hordeum vulgare	cis-acting element involved in low-temperature responsiveness
CsBAG4.1	CCGTCC-box	CCGTCC	986	6	+	Petroselinum hortense
CsBAG4.1	CCGTCC motif	CCGTCC	986	6	+	Nicotiana tabacum
CsBAG4.1	G-Box	CACGTT	416	6	-	Pisum sativum	cis-acting regulatory element involved in light responsiveness
CsBAG4.1	ABRE	ACGTG	1580	5	+	Arabidopsis thaliana	cis-acting element involved in the abscisic acid responsiveness
CsBAG4.1	ABRE	ACGTG	1820	5	-	Arabidopsis thaliana	cis-acting element involved in the abscisic acid responsiveness
CsBAG4.1	TCT-motif	TCTTAC	673	6	-	Arabidopsis thaliana	part of a light responsive element
CsBAG4.1	TCT-motif	TCTTAC	789	6	+	Arabidopsis thaliana	part of a light responsive element
CsBAG4.1	MBS	CAACTG	464	6	+	Arabidopsis thaliana	MYB binding site involved in drought-inducibility
CsBAG5	TGA-element	AACGAC	152	6	-	Brassica oleracea	auxin-responsive element
CsBAG5	G-box	CACGAC	1434	6	+	Zea mays	cis-acting regulatory element involved in light responsiveness
CsBAG5	G-box	CACGTG	1966	6	-	Arabidopsis thaliana	cis-acting regulatory element involved in light responsiveness
CsBAG5	O2-site	GATGATGTGG	913	9	-	Zea mays	cis-acting regulatory element involved in zein metabolism regulation
CsBAG5	Myc	TCTCTTA	1881	7	+	Arabidopsis thaliana
CsBAG5	CCAAT-box	CAACGG	1835	6	-	Hordeum vulgare	MYBHv1 binding site
CsBAG5	W box	TTGACC	1472	6	+	Arabidopsis thaliana
CsBAG5	Myb	TAACTG	1276	6	+	Arabidopsis thaliana
CsBAG5	Myb	TAACTG	936	6	+	Arabidopsis thaliana
CsBAG5	Myb	CAACTG	1974	6	-	Arabidopsis thaliana
CsBAG5	Unnamed__4	CTCC	1693	4	+	Petroselinum hortense
CsBAG5	Unnamed__4	CTCC	1683	4	+	Petroselinum hortense
CsBAG5	Unnamed__4	CTCC	733	4	-	Petroselinum hortense
CsBAG5	Unnamed__4	CTCC	793	4	-	Petroselinum hortense
CsBAG5	Unnamed__4	CTCC	1087	4	+	Petroselinum hortense
CsBAG5	Unnamed__4	CTCC	82	4	+	Petroselinum hortense
CsBAG5	TGACG-motif	TGACG	1273	5	+	Hordeum vulgare	cis-acting regulatory element involved in the MeJA-responsiveness
CsBAG5	TGACG-motif	TGACG	1920	5	-	Hordeum vulgare	cis-acting regulatory element involved in the MeJA-responsiveness
CsBAG5	CGTCA-motif	CGTCA	724	5	-	Hordeum vulgare	cis-acting regulatory element involved in the MeJA-responsiveness
CsBAG5	CGTCA-motif	CGTCA	77	5	+	Hordeum vulgare	cis-acting regulatory element involved in the MeJA-responsiveness
CsBAG5	TCA	TCATCTTCAT	1390	9	+	Pisum sativum
CsBAG5	ERE	ATTTTAAA	886	8	+	Nicotiana glutinos
CsBAG5	ERE	ATTTTAAA	532	8	+	Nicotiana glutinos
CsBAG5	A-box	CCGTCC	1418	6	+	Petroselinum crispum	cis-acting regulatory element
CsBAG5	A-box	CCGTCC	283	6	+	Petroselinum crispum	cis-acting regulatory element
CsBAG5	as-1	TGACG	1273	5	+	Arabidopsis thaliana
CsBAG5	as-1	TGACG	1920	5	-	Arabidopsis thaliana
CsBAG5	TC-rich repeats	GTTTTCTTAC	460	9	-	Nicotiana tabacum	cis-acting element involved in defense and stress responsiveness
CsBAG5	TATA	TATAAAAT	892	8	+	Arabidopsis thaliana
CsBAG5	MYB	CAACAG	1962	6	+	Arabidopsis thaliana
CsBAG5	MYB	CAACCA	1875	6	+	Arabidopsis thaliana
CsBAG5	MYB	CAACAG	1288	6	+	Arabidopsis thaliana
CsBAG5	MYB	CAACAG	1223	6	+	Arabidopsis thaliana
CsBAG5	MYB	CAACCA	985	6	+	Arabidopsis thaliana
CsBAG5	I-box	atGATAAGGTC	362	10	-	Helianthus annuus	part of a light responsive element
CsBAG5	MYB recognition site	CCGTTG	161	6	+	Arabidopsis thaliana
CsBAG5	AE-box	AGAAACAA	993	8	-	Arabidopsis thaliana	part of a module for light response
CsBAG5	Box 4	ATTAAT	1411	6	-	Petroselinum crispum	part of a conserved DNA module involved in light responsiveness
CsBAG5	Box 4	ATTAAT	1575	6	-	Petroselinum crispum	part of a conserved DNA module involved in light responsiveness
CsBAG5	Box 4	ATTAAT	1621	6	-	Petroselinum crispum	part of a conserved DNA module involved in light responsiveness
CsBAG5	Myb-binding site	CAACAG	1962	6	+	Nicotiana tabacum
CsBAG5	Myb-binding site	CAACAG	1288	6	+	Nicotiana tabacum
CsBAG5	Myb-binding site	CAACAG	1223	6	+	Nicotiana tabacum
CsBAG5	ABRE	GACACGTGGC	1964	9	-	Triticum aestivum	cis-acting element involved in the abscisic acid responsiveness
CsBAG5	ABRE	CACGTG	1966	6	-	Arabidopsis thaliana	cis-acting element involved in the abscisic acid responsiveness
CsBAG5	ABRE	ACGTG	30	5	+	Arabidopsis thaliana	cis-acting element involved in the abscisic acid responsiveness
CsBAG5	TCT-motif	TCTTAC	1880	6	+	Arabidopsis thaliana	part of a light responsive element
CsBAG5	TCT-motif	TCTTAC	460	6	-	Arabidopsis thaliana	part of a light responsive element
CsBAG5	TCT-motif	TCTTAC	1489	6	+	Arabidopsis thaliana	part of a light responsive element
CsBAG5	G-Box	CACGTG	1966	6	-	Pisum sativum	cis-acting regulatory element involved in light responsiveness
CsBAG5	Unnamed__1	GCCACGTGGC	1964	9	-	Petunia sp.
CsBAG5	Unnamed__1	CGTGG	1965	5	-	Zea mays
CsBAG5	MBS	CAACTG	1974	6	-	Arabidopsis thaliana	MYB binding site involved in drought-inducibility
CsBAG5	motif I	gGTACGTGGCG	1963	10	-	Oryza sativa	cis-acting regulatory element root specific
CsBAG5	LTR	CCGAAA	1908	6	-	Hordeum vulgare	cis-acting element involved in low-temperature responsiveness
CsBAG5	CCGTCC motif	CCGTCC	1418	6	+	Nicotiana tabacum
CsBAG5	CCGTCC motif	CCGTCC	283	6	+	Nicotiana tabacum
CsBAG5	CCGTCC-box	CCGTCC	1418	6	+	Petroselinum hortense
CsBAG5	CCGTCC-box	CCGTCC	283	6	+	Petroselinum hortense
CsBAG5	GARE-motif	TCTGTTG	34	7	-	Brassica oleracea	gibberellin-responsive element
CsBAG5	GARE-motif	TCTGTTG	708	7	-	Brassica oleracea	gibberellin-responsive element
CsBAG5	WUN-motif	AAATTACTA	1172	9	+	Nicotiana glutinosa
CsBAG5	MYC	CATGTG	1541	6	+	Arabidopsis thaliana
CsBAG5	MYC	CATTTG	482	6	-	Arabidopsis thaliana
CsBAG5	MYC	CATTTG	550	6	+	Arabidopsis thaliana
CsBAG5	MYC	CATTTG	127	6	+	Arabidopsis thaliana
CsBAG6	ABRE4	CACGTA	1185	6	+	Zea mays
CsBAG6	OCT	CGCGGATC	832	8	+	Zea mays
CsBAG6	Myb-binding site	CAACAG	1264	6	-	Nicotiana tabacum
CsBAG6	G-Box	CACGTG	1488	6	+	Pisum sativum	cis-acting regulatory element involved in light responsiveness
CsBAG6	G-Box	CACGTG	1672	6	-	Pisum sativum	cis-acting regulatory element involved in light responsiveness
CsBAG6	TCT-motif	TCTTAC	631	6	-	Arabidopsis thaliana	part of a light responsive element
CsBAG6	ABRE	CACGTG	1488	6	+	Arabidopsis thaliana	cis-acting element involved in the abscisic acid responsiveness
CsBAG6	ABRE	ACGTG	1488	5	+	Arabidopsis thaliana	cis-acting element involved in the abscisic acid responsiveness
CsBAG6	ABRE	ACGTG	811	5	-	Arabidopsis thaliana	cis-acting element involved in the abscisic acid responsiveness
CsBAG6	ABRE	GACACGTGGC	1670	9	-	Triticum aestivum	cis-acting element involved in the abscisic acid responsiveness
CsBAG6	ABRE	CACGTG	1672	6	-	Arabidopsis thaliana	cis-acting element involved in the abscisic acid responsiveness
CsBAG6	ABRE	ACGTG	324	5	+	Arabidopsis thaliana	cis-acting element involved in the abscisic acid responsiveness
CsBAG6	Unnamed__1	CGTGG	1213	5	+	Zea mays
CsBAG6	Unnamed__1	CGTGG	810	5	-	Zea mays
CsBAG6	Unnamed__1	CGTGG	1671	5	-	Zea mays
CsBAG6	ABRE3a	TACGTG	811	6	-	Zea mays
CsBAG6	MYC	CAATTG	1280	6	+	Arabidopsis thaliana
CsBAG6	MYC	CATTTG	1153	6	-	Arabidopsis thaliana
CsBAG6	MYC	CATTTG	666	6	+	Arabidopsis thaliana
CsBAG6	MYC	CAATTG	1437	6	-	Arabidopsis thaliana
CsBAG6	AT~TATA-box	TATATA	1904	6	-	Arabidopsis thaliana
CsBAG6	GC-motif	CCCCCG	452	6	+	Zea mays	enhancer-like element involved in anoxic specific inducibility
CsBAG6	STRE	AGGGG	960	5	-	Arabidopsis thaliana
CsBAG6	STRE	AGGGG	1922	5	-	Arabidopsis thaliana
CsBAG6	CTAG-motif	ACTAGCAGAA	951	9	+	Avena sativa
CsBAG6	CGTCA-motif	CGTCA	360	5	+	Hordeum vulgare	cis-acting regulatory element involved in the MeJA-responsiveness
CsBAG6	Myb	TAACTG	156	6	-	Arabidopsis thaliana
CsBAG6	Unnamed__4	CTCC	1515	4	+	Petroselinum hortense
CsBAG6	Unnamed__4	CTCC	672	4	-	Petroselinum hortense
CsBAG6	Unnamed__4	CTCC	779	4	-	Petroselinum hortense
CsBAG6	Unnamed__4	CTCC	797	4	-	Petroselinum hortense
CsBAG6	Unnamed__4	CTCC	1157	4	+	Petroselinum hortense
CsBAG6	Unnamed__4	CTCC	1095	4	-	Petroselinum hortense
CsBAG6	Unnamed__4	CTCC	1179	4	-	Petroselinum hortense
CsBAG6	Unnamed__4	CTCC	1236	4	-	Petroselinum hortense
CsBAG6	Unnamed__4	CTCC	1260	4	-	Petroselinum hortense
CsBAG6	Unnamed__4	CTCC	438	4	+	Petroselinum hortense
CsBAG6	Unnamed__4	CTCC	1610	4	-	Petroselinum hortense
CsBAG6	Unnamed__4	CTCC	231	4	+	Petroselinum hortense
CsBAG6	Unnamed__4	CTCC	201	4	+	Petroselinum hortense
CsBAG6	TGACG-motif	TGACG	1647	5	-	Hordeum vulgare	cis-acting regulatory element involved in the MeJA-responsiveness
CsBAG6	W box	TTGACC	120	6	-	Arabidopsis thaliana
CsBAG6	ATC-motif	AGTAATCT	193	8	+	Spinacia oleracea	part of a conserved DNA module involved in light responsiveness
CsBAG6	AT-rich element	ATAGAAATCAA	880	10	-	Glycine max	binding site of AT-rich DNA binding protein (ATBP-1)
CsBAG6	G-box	CACGTG	1488	6	+	Arabidopsis thaliana	cis-acting regulatory element involved in light responsiveness
CsBAG6	G-box	CCACGTAA	1184	8	+	Brassica napus	cis-acting regulatory element involved in light responsiveness
CsBAG6	G-box	TACGTG	811	6	-	Arabidopsis thaliana	cis-acting regulatory element involved in light responsiveness
CsBAG6	G-box	TGACACGTGGCTCT	1667	13	-	Helianthus annuus	cis-acting regulatory element involved in light responsiveness
CsBAG6	G-box	GCCACGTGGA	1670	9	-	Arabidopsis thaliana	cis-acting regulatory element involved in light responsiveness
CsBAG6	G-box	CACGTG	1672	6	-	Arabidopsis thaliana	cis-acting regulatory element involved in light responsiveness
CsBAG6	TGA-element	AACGAC	1585	6	-	Brassica oleracea	auxin-responsive element
CsBAG6	TATA-box	TATA	1906	4	-	Arabidopsis thaliana	core promoter element around -30 of transcription start
CsBAG6	MYB	CAACAG	1264	6	-	Arabidopsis thaliana
CsBAG6	MRE	AACCTAA	184	7	+	Petroselinum crispum	MYB binding site involved in light responsiveness
CsBAG6	AE-box	AGAAACAA	830	8	-	Arabidopsis thaliana	part of a module for light response
CsBAG6	AAGAA-motif	GAAAGAA	849	7	+	Avena sativa
CsBAG6	AAGAA-motif	GAAAGAA	18	7	+	Avena sativa
CsBAG6	GATA-motif	GATAGGA	1846	7	-	Arabidopsis thaliana	part of a light responsive element
CsBAG6	ERE	ATTTCATA	1985	8	+	Nicotiana glutinos
CsBAG6	ERE	ATTTTAAA	940	8	-	Nicotiana glutinos
CsBAG6	TCCC-motif	TCTCCCT	1155	7	+	Spinacia oleracea	part of a light responsive element
CsBAG6	TCCC-motif	TCTCCCT	1177	7	-	Spinacia oleracea	part of a light responsive element
CsBAG7	DRE core	GCCGAC	1733	6	+	Arabidopsis thaliana
CsBAG7	DRE core	GCCGAC	480	6	+	Arabidopsis thaliana
CsBAG7	GT1-motif	GGTTAAT	1108	7	-	Avena sativa	light responsive element
CsBAG7	GT1-motif	GGTTAA	1109	6	-	Arabidopsis thaliana	light responsive element
CsBAG7	TCA-element	TCAGAAGAGG	1861	9	-	Brassica oleracea	cis-acting element involved in salicylic acid responsiveness
CsBAG7	ARE	AAACCA	1797	6	+	Zea mays	cis-acting regulatory element essential for the anaerobic induction
CsBAG7	ARE	AAACCA	336	6	+	Zea mays	cis-acting regulatory element essential for the anaerobic induction
CsBAG7	MYC	CAATTG	1348	6	+	Arabidopsis thaliana
CsBAG7	MYC	CATTTG	1177	6	+	Arabidopsis thaliana
CsBAG7	MYC	CATGTG	914	6	-	Arabidopsis thaliana
CsBAG7	MYC	CATGTG	1622	6	-	Arabidopsis thaliana
CsBAG7	WUN-motif	AAATTACT	1971	8	+	Nicotiana glutinosa
CsBAG7	WUN-motif	CAATTACAT	1464	9	+	Nicotiana glutinosa
CsBAG7	WUN-motif	AAATTTCTT	849	9	+	Nicotiana glutinosa
CsBAG7	Unnamed__1	CGTGG	446	5	+	Zea mays
CsBAG7	Unnamed__1	CGTGG	413	5	+	Zea mays
CsBAG7	Myb-binding site	CAACAG	233	6	+	Nicotiana tabacum
CsBAG7	G-Box	CACGTG	1582	6	-	Pisum sativum	cis-acting regulatory element involved in light responsiveness
CsBAG7	ABRE	CACGTG	1582	6	-	Arabidopsis thaliana	cis-acting element involved in the abscisic acid responsiveness
CsBAG7	ABRE	ACGTG	414	5	+	Arabidopsis thaliana	cis-acting element involved in the abscisic acid responsiveness
CsBAG7	ABRE	TACGGTC	284	7	+	Arabidopsis thaliana	cis-acting element involved in the abscisic acid responsiveness
CsBAG7	CARE	CAACTCAC	30	8	+	Oryza sativa
CsBAG7	TATA	TATAAAAT	894	8	+	Arabidopsis thaliana
CsBAG7	ERE	ATTTCATA	1165	8	+	Nicotiana glutinos
CsBAG7	ERE	ATTTTAAA	806	8	+	Nicotiana glutinos
CsBAG7	ERE	ATTTCATA	1298	8	-	Nicotiana glutinos
CsBAG7	TCA	TCATCTTCAT	1543	9	+	Pisum sativum
CsBAG7	3-AF3 binding site	CACTATCTAAC	1889	10	+	Pisum sativum	part of a conserved DNA module array (CMA3)
CsBAG7	as-1	TGACG	965	5	-	Arabidopsis thaliana
CsBAG7	as-1	TGACG	180	5	+	Arabidopsis thaliana
CsBAG7	as-1	TGACG	1846	5	-	Arabidopsis thaliana
CsBAG7	AE-box	AGAAACTT	161	8	-	Arabidopsis thaliana	part of a module for light response
CsBAG7	AE-box	AGAAACAA	1013	8	+	Arabidopsis thaliana	part of a module for light response
CsBAG7	AAGAA-motif	GAAAGAA	1860	7	+	Avena sativa
CsBAG7	GATA-motif	GATAGGG	426	7	-	Pisum sativum	part of a light responsive element
CsBAG7	GATA-motif	GATAGGA	1932	7	-	Arabidopsis thaliana	part of a light responsive element
CsBAG7	I-box	AAGATAAGGCT	1085	10	-	Gossypium hirsutum	part of a light responsive element
CsBAG7	MYB	CAACAG	133	6	+	Arabidopsis thaliana
CsBAG7	G-box	GCCACGTGGA	455	9	+	Arabidopsis thaliana	cis-acting regulatory element involved in light responsiveness
CsBAG7	G-box	CACGTG	1582	6	-	Arabidopsis thaliana	cis-acting regulatory element involved in light responsiveness
CsBAG7	O2-site	GATGATGTGG	913	9	-	Zea mays	cis-acting regulatory element involved in zein metabolism regulation
CsBAG7	CGTCA-motif	CGTCA	1032	5	+	Hordeum vulgare	cis-acting regulatory element involved in the MeJA-responsiveness
CsBAG7	CGTCA-motif	CGTCA	1817	5	-	Hordeum vulgare	cis-acting regulatory element involved in the MeJA-responsiveness
CsBAG7	CGTCA-motif	CGTCA	151	5	+	Hordeum vulgare	cis-acting regulatory element involved in the MeJA-responsiveness
CsBAG7	TGACG-motif	TGACG	965	5	-	Hordeum vulgare	cis-acting regulatory element involved in the MeJA-responsiveness
CsBAG7	TGACG-motif	TGACG	180	5	+	Hordeum vulgare	cis-acting regulatory element involved in the MeJA-responsiveness
CsBAG7	TGACG-motif	TGACG	1846	5	-	Hordeum vulgare	cis-acting regulatory element involved in the MeJA-responsiveness
CsBAG7	Unnamed__4	CTCC	897	4	-	Petroselinum hortense
CsBAG7	Unnamed__4	CTCC	1061	4	+	Petroselinum hortense
CsBAG7	Unnamed__4	CTCC	1027	4	+	Petroselinum hortense
CsBAG7	Unnamed__4	CTCC	971	4	+	Petroselinum hortense
CsBAG7	Unnamed__4	CTCC	773	4	+	Petroselinum hortense
CsBAG7	Unnamed__4	CTCC	1308	4	-	Petroselinum hortense
CsBAG7	Unnamed__4	CTCC	531	4	+	Petroselinum hortense
CsBAG7	Unnamed__4	CTCC	392	4	+	Petroselinum hortense
CsBAG7	Unnamed__4	CTCC	37	4	+	Petroselinum hortense
CsBAG7	STRE	AGGGG	550	5	+	Arabidopsis thaliana
CsBAG7	STRE	AGGGG	1798	5	-	Arabidopsis thaliana
CsBAG7	Myc	TCTCTTA	1926	7	+	Arabidopsis thaliana
CsBAG8	CGTCA-motif	CGTCA	706	5	-	Hordeum vulgare	cis-acting regulatory element involved in the MeJA-responsiveness
CsBAG8	CGTCA-motif	CGTCA	993	5	+	Hordeum vulgare	cis-acting regulatory element involved in the MeJA-responsiveness
CsBAG8	CGTCA-motif	CGTCA	334	5	+	Hordeum vulgare	cis-acting regulatory element involved in the MeJA-responsiveness
CsBAG8	CGTCA-motif	CGTCA	170	5	+	Hordeum vulgare	cis-acting regulatory element involved in the MeJA-responsiveness
CsBAG8	CGTCA-motif	CGTCA	71	5	+	Hordeum vulgare	cis-acting regulatory element involved in the MeJA-responsiveness
CsBAG8	TGACG-motif	TGACG	1291	5	+	Hordeum vulgare	cis-acting regulatory element involved in the MeJA-responsiveness
CsBAG8	TGACG-motif	TGACG	1004	5	-	Hordeum vulgare	cis-acting regulatory element involved in the MeJA-responsiveness
CsBAG8	TGACG-motif	TGACG	1663	5	-	Hordeum vulgare	cis-acting regulatory element involved in the MeJA-responsiveness
CsBAG8	TGACG-motif	TGACG	1827	5	-	Hordeum vulgare	cis-acting regulatory element involved in the MeJA-responsiveness
CsBAG8	TGACG-motif	TGACG	1926	5	-	Hordeum vulgare	cis-acting regulatory element involved in the MeJA-responsiveness
CsBAG8	MYB-like sequence	TAACCA	1700	6	+	Arabidopsis thaliana
CsBAG8	MYB-like sequence	TAACCA	1319	6	-	Arabidopsis thaliana
CsBAG8	Unnamed__4	CTCC	1690	4	+	Petroselinum hortense
CsBAG8	Unnamed__4	CTCC	1579	4	+	Petroselinum hortense
CsBAG8	Unnamed__4	CTCC	1518	4	+	Petroselinum hortense
CsBAG8	Unnamed__4	CTCC	1339	4	+	Petroselinum hortense
CsBAG8	Unnamed__4	CTCC	686	4	+	Petroselinum hortense
CsBAG8	Unnamed__4	CTCC	421	4	+	Petroselinum hortense
CsBAG8	Unnamed__4	CTCC	1739	4	-	Petroselinum hortense
CsBAG8	CCAAT-box	CAACGG	1552	6	+	Hordeum vulgare	MYBHv1 binding site
CsBAG8	Box 4	ATTAAT	1764	6	+	Petroselinum crispum	part of a conserved DNA module involved in light responsiveness
CsBAG8	Box 4	ATTAAT	1750	6	+	Petroselinum crispum	part of a conserved DNA module involved in light responsiveness
CsBAG8	Box 4	ATTAAT	1746	6	+	Petroselinum crispum	part of a conserved DNA module involved in light responsiveness
CsBAG8	Box 4	ATTAAT	1718	6	+	Petroselinum crispum	part of a conserved DNA module involved in light responsiveness
CsBAG8	Box 4	ATTAAT	1443	6	-	Petroselinum crispum	part of a conserved DNA module involved in light responsiveness
CsBAG8	Box 4	ATTAAT	1472	6	-	Petroselinum crispum	part of a conserved DNA module involved in light responsiveness
CsBAG8	ABRE2	CCACGTGG	1572	8	+	Zea mays
CsBAG8	ABRE2	CCACGTGG	1354	8	+	Zea mays
CsBAG8	AAGAA-motif	GAAAGAA	1440	7	+	Avena sativa
CsBAG8	AAGAA-motif	GAAAGAA	719	7	-	Avena sativa
CsBAG8	AAGAA-motif	gGTAAAGAAA	1126	9	+	Avena sativa
CsBAG8	AAGAA-motif	GAAAGAA	1123	7	+	Avena sativa
CsBAG8	GATA-motif	AAGGATAAGG	1573	9	-	Solanum tuberosum	part of a light responsive element
CsBAG8	TC-rich repeats	ATTCTCTAAC	370	9	+	Nicotiana tabacum	cis-acting element involved in defense and stress responsiveness
CsBAG8	as-1	TGACG	1291	5	+	Arabidopsis thaliana
CsBAG8	as-1	TGACG	1004	5	-	Arabidopsis thaliana
CsBAG8	as-1	TGACG	1663	5	-	Arabidopsis thaliana
CsBAG8	as-1	TGACG	1827	5	-	Arabidopsis thaliana
CsBAG8	as-1	TGACG	1926	5	-	Arabidopsis thaliana
CsBAG8	box S	AGCCACC	511	7	-	Arabidopsis thaliana
CsBAG8	MBS	CAACTG	1792	6	+	Arabidopsis thaliana	MYB binding site involved in drought-inducibility
CsBAG8	MBS	CAACTG	166	6	+	Arabidopsis thaliana	MYB binding site involved in drought-inducibility
CsBAG8	G-Box	CACGTG	1941	6	+	Pisum sativum	cis-acting regulatory element involved in light responsiveness
CsBAG8	G-Box	CACGTG	1573	6	+	Pisum sativum	cis-acting regulatory element involved in light responsiveness
CsBAG8	G-Box	CACGTG	1533	6	+	Pisum sativum	cis-acting regulatory element involved in light responsiveness
CsBAG8	G-Box	CACGTG	1501	6	+	Pisum sativum	cis-acting regulatory element involved in light responsiveness
CsBAG8	G-Box	CACGTG	1355	6	+	Pisum sativum	cis-acting regulatory element involved in light responsiveness
CsBAG8	G-Box	CACGTG	1213	6	-	Pisum sativum	cis-acting regulatory element involved in light responsiveness
CsBAG8	G-Box	CACGTG	1279	6	-	Pisum sativum	cis-acting regulatory element involved in light responsiveness
CsBAG8	ABRE	CGCACGTGTC	53	9	-	Hordeum vulgare	cis-acting element involved in the abscisic acid responsiveness
CsBAG8	ABRE	CACGTG	1941	6	+	Arabidopsis thaliana	cis-acting element involved in the abscisic acid responsiveness
CsBAG8	ABRE	ACGTG	1941	5	+	Arabidopsis thaliana	cis-acting element involved in the abscisic acid responsiveness
CsBAG8	ABRE	CACGTG	1573	6	+	Arabidopsis thaliana	cis-acting element involved in the abscisic acid responsiveness
CsBAG8	ABRE	ACGTG	1573	5	+	Arabidopsis thaliana	cis-acting element involved in the abscisic acid responsiveness
CsBAG8	ABRE	CGCACGTGTC	461	9	-	Hordeum vulgare	cis-acting element involved in the abscisic acid responsiveness
CsBAG8	ABRE	CACGTG	1533	6	+	Arabidopsis thaliana	cis-acting element involved in the abscisic acid responsiveness
CsBAG8	ABRE	ACGTG	1533	5	+	Arabidopsis thaliana	cis-acting element involved in the abscisic acid responsiveness
CsBAG8	ABRE	CACGTG	1501	6	+	Arabidopsis thaliana	cis-acting element involved in the abscisic acid responsiveness
CsBAG8	ABRE	ACGTG	1501	5	+	Arabidopsis thaliana	cis-acting element involved in the abscisic acid responsiveness
CsBAG8	ABRE	GCCGCGTGGC	1353	9	+	Oryza sativa	cis-acting element involved in the abscisic acid responsiveness
CsBAG8	ABRE	CACGTG	1355	6	+	Arabidopsis thaliana	cis-acting element involved in the abscisic acid responsiveness
CsBAG8	ABRE	ACGTG	1355	5	+	Arabidopsis thaliana	cis-acting element involved in the abscisic acid responsiveness
CsBAG8	ABRE	ACGTG	1289	5	+	Arabidopsis thaliana	cis-acting element involved in the abscisic acid responsiveness
CsBAG8	ABRE	ACGTG	718	5	+	Arabidopsis thaliana	cis-acting element involved in the abscisic acid responsiveness
CsBAG8	ABRE	CACGTG	1213	6	-	Arabidopsis thaliana	cis-acting element involved in the abscisic acid responsiveness
CsBAG8	ABRE	ACGTG	183	5	+	Arabidopsis thaliana	cis-acting element involved in the abscisic acid responsiveness
CsBAG8	ABRE	CACGTG	1279	6	-	Arabidopsis thaliana	cis-acting element involved in the abscisic acid responsiveness
CsBAG8	ABRE	ACGTG	727	5	+	Arabidopsis thaliana	cis-acting element involved in the abscisic acid responsiveness
CsBAG8	WRE3	CCACCT	1595	6	+	Pisum sativum
CsBAG8	Unnamed__10	TCCACGTAGA	1076	9	-	Zea mays
CsBAG8	Unnamed__8	TCCACGTAGA	1076	9	-	Zea mays
CsBAG8	Sp1	GGGCGG	343	6	-	Oryza sativa	light responsive element
CsBAG8	Myb	CAACTG	1795	6	+	Arabidopsis thaliana
CsBAG8	Myb	CAACTG	166	6	+	Arabidopsis thaliana
CsBAG8	STRE	AGGGG	305	5	-	Arabidopsis thaliana
CsBAG8	STRE	AGGGG	1313	5	-	Arabidopsis thaliana
CsBAG8	STRE	AGGGG	37	5	+	Arabidopsis thaliana
CsBAG8	G-box	CACGTG	1941	6	+	Arabidopsis thaliana	cis-acting regulatory element involved in light responsiveness
CsBAG8	G-box	CACGTG	1573	6	+	Arabidopsis thaliana	cis-acting regulatory element involved in light responsiveness
CsBAG8	G-box	CACGTG	1533	6	+	Arabidopsis thaliana	cis-acting regulatory element involved in light responsiveness
CsBAG8	G-box	CACGTG	1501	6	+	Arabidopsis thaliana	cis-acting regulatory element involved in light responsiveness
CsBAG8	G-box	GCCACGTGGA	1353	9	+	Arabidopsis thaliana	cis-acting regulatory element involved in light responsiveness
CsBAG8	G-box	CACGTG	1355	6	+	Arabidopsis thaliana	cis-acting regulatory element involved in light responsiveness
CsBAG8	G-box	CACGTC	707	6	-	Zea mays	cis-acting regulatory element involved in light responsiveness
CsBAG8	G-box	GCCACGTGGA	1076	9	-	Arabidopsis thaliana	cis-acting regulatory element involved in light responsiveness
CsBAG8	G-box	TACGTG	918	6	+	Arabidopsis thaliana	cis-acting regulatory element involved in light responsiveness
CsBAG8	G-box	ACACGTGT	1212	8	-	Brassica napus	cis-acting regulatory element involved in light responsiveness
CsBAG8	G-box	CACGTG	1213	6	-	Arabidopsis thaliana	cis-acting regulatory element involved in light responsiveness
CsBAG8	G-box	CACGTG	1279	6	-	Arabidopsis thaliana	cis-acting regulatory element involved in light responsiveness
CsBAG8	TGA-element	AACGAC	771	6	+	Brassica oleracea	auxin-responsive element
CsBAG8	HD-Zip 1	CAAT(A/T)ATTG	1167	8	-	Arabidopsis thaliana	element involved in differentiation of the palisade mesophyll cells
CsBAG8	Box II	CCACGTGGC	639	9	-	Petroselinum crispum	part of a light responsive element
CsBAG8	Box II	CCACGTGGC	1353	9	+	Petroselinum crispum	part of a light responsive element
CsBAG8	MYB recognition site	CCGTTG	444	6	-	Arabidopsis thaliana
CsBAG8	I-box	GTATAAGGCC	1927	9	+	Larix laricina	part of a light responsive element
CsBAG8	MYB	TAACCA	1700	6	+	Arabidopsis thaliana
CsBAG8	MYB	TAACCA	1319	6	-	Arabidopsis thaliana
CsBAG8	TCA	TCATCTTCAT	442	9	+	Pisum sativum
CsBAG8	TCA	TCATCTTCAT	436	9	+	Pisum sativum
CsBAG8	CAAT-box	CAAT	45	4	-	Nicotiana glutinosa
CsBAG8	ABRE4	CACGTA	1078	6	-	Zea mays
CsBAG8	Unnamed__1	CGTGG	422	5	-	Zea mays
CsBAG8	Unnamed__1	CGTGG	1572	5	+	Zea mays
CsBAG8	Unnamed__1	CGTGG	462	5	-	Zea mays
CsBAG8	Unnamed__1	GCCACGTGGC	1353	10	+	Petunia sp.
CsBAG8	Unnamed__1	CGTGG	640	5	-	Zea mays
CsBAG8	Unnamed__1	CGTGG	1354	5	+	Zea mays
CsBAG8	Unnamed__1	CGTGG	1288	5	+	Zea mays
CsBAG8	Unnamed__1	CGTGG	917	5	+	Zea mays
CsBAG8	Unnamed__1	CGTGG	1278	5	-	Zea mays
CsBAG8	Unnamed__12	TCCACGTAGA	1076	9	-	Zea mays
CsBAG8	TCT-motif	TCTTAC	1115	6	-	Arabidopsis thaliana	part of a light responsive element
CsBAG8	ABRE3a	TACGTG	918	6	+	Zea mays
CsBAG8	MYC	CAATTG	1837	6	+	Arabidopsis thaliana
CsBAG8	MYC	CAATTG	1617	6	+	Arabidopsis thaliana
CsBAG8	MYC	CATGTG	1009	6	+	Arabidopsis thaliana
CsBAG8	MYC	CATGTG	1110	6	-	Arabidopsis thaliana
CsBAG8	CAT-box	GCCACT	100	6	-	Arabidopsis thaliana	cis-acting regulatory element related to meristem expression
CsBAG8	GA-motif	ATAGATAA	1067	8	+	Arabidopsis thaliana	part of a light responsive element
CsBAG8	GT1-motif	GGTTAA	1334	6	-	Arabidopsis thaliana	light responsive element
CsBAG8	GT1-motif	GGTTAA	1568	6	-	Arabidopsis thaliana	light responsive element
CsBAG8	Unnamed__14	TCCACGTAGA	1076	9	-	Zea mays
CsBAG8	ARE	AAACCA	1901	6	+	Zea mays	cis-acting regulatory element essential for the anaerobic induction
CsBAG8	ARE	AAACCA	688	6	-	Zea mays	cis-acting regulatory element essential for the anaerobic induction

## Sheet: Table S5
Table S5 Information on predicted transcription factors (TFs) interacting with CsBAG genes.
Target	TF	Family	Binding site number	Position	Sequence 1	Strand	p-value
CsBAG1	orange1.1g048459m.g	C2H2	4	1553-1571，1556-1574，1559-1577，1562-1580	TCTCCACCTCGTCCTCCGT，CCACCTCGTCCTCCGTCTC，CCTCGTCCTCCGTCTCCGC，CGTCCTCCGTCTCCGCGGC	+，+，+，+	0.000000798,0.000000262,0.000000389,0.00000526
CsBAG1	orange1.1g047495m.g	TCP	2	611-640，628-657	CGTGGGACCCATGTCCGTTGCCTTTTGACG，CATGGGTCCCACGGTGTTCCGGGACGGTGC	-,+	0.000000902,0.00000239
CsBAG1	orange1.1g047455m.g	ERF	1	1568-1588	TACGTGCCGCCGCGGAGACGG	-	8.66e-06
CsBAG1	orange1.1g046549m.g	Dof	1	1146-1166	GAAACAAAAAAGAAGAAGCAA	+	3.73e-06
CsBAG1	orange1.1g045783m.g	ERF	3	1553-1573,1556-1576,1559-1579	TCTCCACCTCGTCCTCCGTCT,CCACCTCGTCCTCCGTCTCCG,CCTCGTCCTCCGTCTCCGCGG	+,+,+	0.000000429,0.00000331,0.00000122
CsBAG1	orange1.1g044161m.g	MYB	1	720-734	CTAATATTAGGTAAA	-	5.52e-06
CsBAG1	orange1.1g043617m.g	Dof	1	1014-1024	CAAAAAGGGGA	-	3.35e-06
CsBAG1	orange1.1g043614m.g	ERF	1	1574-1588	TACGTGCCGCCGCGG	-	8.53e-06
CsBAG1	orange1.1g040096m.g	MIKC_MADS	2	1042-1055,1108-1121	ACAAAAAGGGCAAA,GCCAAAAAAGAAAA	-,+	0.0000081,0.00000847
CsBAG1	orange1.1g039680m.g	ERF	1	1553-1572	TCTCCACCTCGTCCTCCGTC	+	7.06e-06
CsBAG1	orange1.1g038243m.g	AP2	2	1144-1163,411-430	ACAAAAAGGGCAAA,TAAACTGAAAAGAAAAGAAG	+,-	0.00000615,0.00000953
CsBAG1	orange1.1g038129m.g	LBD	1	1852-1866	TGCGTATTAAGCGCC	+	9.48e-06
CsBAG1	orange1.1g037093m.g	ERF	3	1561-1581,1564-1584,1566-1586	TCGTCCTCCGTCTCCGCGGCG,TCCTCCGTCTCCGCGGCGGCA,CGTGCCGCCGCGGAGACGGAG	+,+,-	0.00000401,0.00000513,0.00000825
CsBAG1	orange1.1g036845m.g	LBD	5	1552-1572，1555-1575，1558-1578，1561-1581，1564-1584	CTCTCCACCTCGTCCTCCGTC，TCCACCTCGTCCTCCGTCTCC，ACCTCGTCCTCCGTCTCCGCG，TCGTCCTCCGTCTCCGCGGCG，TCCTCCGTCTCCGCGGCGGCA	+,+,+,+,+	0.00000431,0.000000161,0.00000512,0.00000167,0.000000466
CsBAG1	orange1.1g036452m.g	MIKC_MADS	2	1010-1028,1106-1124	CTCTTCCCCTTTTTGGCCA,TTTTTTTCTTTTTTGGCAG	+,-	0.000000464,0.00000702
CsBAG1	orange1.1g036344m.g	MYB	1	1595-1607	CGGGGGTGGATGG	+	8e-06
CsBAG1	orange1.1g036178m.g	Dof	1	1011-1024	CAAAAAGGGGAAGA	-	4.38e-06
CsBAG1	orange1.1g036154m.g	ERF	1	1575-1582	CCGCCGCG	-	6.54e-06
CsBAG1	orange1.1g035756m.g	ERF	3	1554-1573,1557-1576,1560-1579	CTCCACCTCGTCCTCCGTCT,CACCTCGTCCTCCGTCTCCG,CTCGTCCTCCGTCTCCGCGG	+,+,+	0.000000132,0.00000263,0.00000308
CsBAG1	orange1.1g029507m.g	ERF	2	1552-1570,1561-1579	CGGAGGACGAGGTGGAGAG,CCGCGGAGACGGAGGACGA	-,-	0.00000675,0.00000182
CsBAG1	orange1.1g028913m.g	ERF	5	1552-1572，1555-1575，1558-1578，1561-1581，1564-1584	CTCTCCACCTCGTCCTCCGTC，TCCACCTCGTCCTCCGTCTCC，ACCTCGTCCTCCGTCTCCGCG，TCGTCCTCCGTCTCCGCGGCG，TCCTCCGTCTCCGCGGCGGCA	+,+,+,+,+	0.000000191,0.00000405,0.00000117,0.000000218,0.000000165
CsBAG1	orange1.1g027691m.g	MIKC_MADS	3	1141-1161,1143-1163,1144-1164	TCTTCTTTTTTGTTTCTTTTG,CTTCTTCTTTTTTGTTTCTTT,GCTTCTTCTTTTTTGTTTCTT	-,-,-	0.000000353,0.000000455,0.00000931
CsBAG1	orange1.1g027472m.g	LBD	2	1553-1573,1559-1579	TCTCCACCTCGTCCTCCGTCT,CCTCGTCCTCCGTCTCCGCGG	+,+	0.00000121,0.000000269
CsBAG1	orange1.1g027470m.g	MIKC_MADS	1	1043-1057	TTACAAAAAGGGCAA	-	5.58e-06
CsBAG1	orange1.1g026216m.g	WRKY	1	1732-1741	CAGTTGACCG	-	5.43e-06
CsBAG1	orange1.1g024786m.g	Dof	1	1141-1161	TCTTCTTTTTTGTTTCTTTTG	-	2.74e-06
CsBAG1	orange1.1g024563m.g	Trihelix	1	1486-1500	GCTTTCCGGCGAAGA	-	9.71e-07
CsBAG1	orange1.1g024547m.g	TCP	1	629-639	GTGGGACCCAT	-	2.13e-07
CsBAG1	orange1.1g024484m.g	MYB	2	1635-1655,659-679	CCTGTACCACCTCACCAACAA,CGTCGAACGCGCCACCAAATC	-,+	0.00000353,0.00000437
CsBAG1	orange1.1g024428m.g	TALE	1	1560-1579	CTCGTCCTCCGTCTCCGCGG	+	3.99e-06
CsBAG1	orange1.1g023883m.g	TCP	1	631-640	GGGTCCCACG	+	3.66e-06
CsBAG1	orange1.1g022880m.g	C3H	1	1014-1027	GGCCAAAAAGGGGA	-	5.46e-06
CsBAG1	orange1.1g021851m.g	MYB_related	1	1780-1791	GAAAATATCTTC	-	1.83e-06
CsBAG1	orange1.1g021785m.g	NAC	1	1566-1585	CTCCGTCTCCGCGGCGGCAC	+	2.11e-06
CsBAG1	orange1.1g021633m.g	Dof	1	1143-1163	AAAGAAACAAAAAAGAAGAAG	+	2.71e-06
CsBAG1	orange1.1g021111m.g	TCP	1	631-639	GGGTCCCAC	+	2.13e-06
CsBAG1	orange1.1g019668m.g	Dof	1	1141-1161	TCTTCTTTTTTGTTTCTTTTG	-	2.51e-06
CsBAG1	orange1.1g019546m.g	ERF	5	1552-1572，1555-1575，1558-1578，1564-1584，1625-1645	GACGGAGGACGAGGTGGAGAG，GGAGACGGAGGACGAGGTGGA，CGCGGAGACGGAGGACGAGGT，TGCCGCCGCGGAGACGGAGGA，GGATGTGGTTTTGTTGGTGAG	-,-,-,-,+	0.00000361,0.000000502,0.00000399,0.000000923,0.00000356
CsBAG1	orange1.1g019413m.g	Trihelix	1	1489-1499	TCGCCGGAAAG	+	1.31e-06
CsBAG1	orange1.1g016130m.g	TCP	2	627-639,629-641	ACATGGGTCCCAC,CCGTGGGACCCAT	+,-	0.000004,0.000001
CsBAG1	orange1.1g015627m.g	E2F/DP	1	1857-1870	ATTAAGCGCCAAAG	+	8.33e-06
CsBAG1	orange1.1g014326m.g	TCP	2	620-639,629-648	GCAACGGACATGGGTCCCAC,CGGAACACCGTGGGACCCAT	+,-	0.000000264,0.00000162
CsBAG1	orange1.1g012625m.g	MYB_related	1	1780-1793	TAGAAAATATCTTC	-	5.3e-06
CsBAG1	orange1.1g011016m.g	Dof	2	1045-1054,365-374	CAAAAAGGGC,AAAAAAGTGC	-,+	0.00000882,0.00000654
CsBAG1	orange1.1g007898m.g	C2H2	1	1704-1721	AACAAGAGGACGAAAATA	-	8.89e-06
CsBAG1	orange1.1g007469m.g	CPP	1	473-482	CATTTGAATG	+	8.24e-06
CsBAG1	orange1.1g004963m.g	WRKY	1	1732-1739	CGGTCAAC	+	5.54e-06
CsBAG1	orange1.1g004262m.g	MYB_related	1	1782-1791	AGATATTTTC	+	3.86e-06
CsBAG1	orange1.1g002317m.g	Nin-like	1	1469-1483	GGACCAGCAGCGGCT	+	1.1e-06
CsBAG2	orange1.1g047012m.g	MYB	1	1706-1716	AGCTAAGCGCC	-	9.24e-06
CsBAG2	orange1.1g046549m.g	Dof	2	1633-1653,832-852	CAACACAAAAAGCAGACTGGA,TAAATAAAAAAGTTGAAAGTG	+,-	0.00000853,0.00000617
CsBAG2	orange1.1g044007m.g	C2H2	1	404-421	CAGATGTAGCCTCTCCCA	+	5.42e-06
CsBAG2	orange1.1g039680m.g	ERF	1	106-125	TTCATTCCCTCCCCACCGAC	+	1.57e-06
CsBAG2	orange1.1g038243m.g	AP2	1	569-588	GAGGGGAAAAAAAAAACAAA	-	8.79e-06
CsBAG2	orange1.1g036655m.g	ERF	1	112-126	CCCTCCCCACCGACA	+	1.83e-06
CsBAG2	orange1.1g035756m.g	ERF	1	1693-1712	AAGCGCCGTGGTTGCCGACA	-	4.47e-06
CsBAG2	orange1.1g031669m.g	ERF	1	113-129	GAATGTCGGTGGGGAGG	-	6.04e-08
CsBAG2	orange1.1g030591m.g	ERF	2	1690-1704,1857-1871	ACCTGTCGGCAACCA,TTGTGTCGGCAGCAA	+,+	0.00000497,0.000000336
CsBAG2	orange1.1g029627m.g	ERF	1	117-131	TGGAATGTCGGTGGG	-	2.03e-06
CsBAG2	orange1.1g029068m.g	ERF	2	115-128,322-335	AATGTCGGTGGGGA,GTGGGCGGTGGGCA	-,+	0.00000548,0.00000278
CsBAG2	orange1.1g028094m.g	ERF	2	117-129,1857-1869	GAATGTCGGTGGG,TTGTGTCGGCAGC	-,+	0.00000833,0.00000517
CsBAG2	orange1.1g027691m.g	MIKC_MADS	1	568-588	TTTTGTTTTTTTTTTCCCCTC	+	2.9e-06
CsBAG2	orange1.1g026216m.g	WRKY	1	1049-1058	CCGTTGACGC	-	6.76e-06
CsBAG2	orange1.1g024791m.g	ERF	2	115-129,1857-1871	GAATGTCGGTGGGGA,TTGTGTCGGCAGCAA	-,+	0.00000142,0.00000943
CsBAG2	orange1.1g024344m.g	bHLH	1	1606-1626	ACGGCGACACGTGGATGTCTT	-	5.16e-06
CsBAG2	orange1.1g023883m.g	TCP	1	328-337	GGTGCCCACC	-	5.42e-06
CsBAG2	orange1.1g023196m.g	MYB	1	914-927	TTTCTTATCTTCAT	+	6.48e-06
CsBAG2	orange1.1g023169m.g	ERF	1	350-364	CTTTCGGCTCCGGCC	+	9.58e-06
CsBAG2	orange1.1g023148m.g	ERF	2	112-126,1693-1707	TGTCGGTGGGGAGGG,TGTCGGCAACCACGG	-,+	0.0000000308，0.00000945
CsBAG2	orange1.1g021851m.g	MYB_related	1	1905-1916	GAAAATATCTTA	-	4.1e-07
CsBAG2	orange1.1g021756m.g	MYB	1	1319-1339	GGAAAATAGGATAATAATGGT	-	3.66e-06
CsBAG2	orange1.1g019668m.g	Dof	1	854-874	CTTACCTTTCAACTTTTCTTT	+	8.16e-06
CsBAG2	orange1.1g019546m.g	ERF	1	117-137	GATGACTGGAATGTCGGTGGG	-	9.69e-06
CsBAG2	orange1.1g017798m.g	ERF	1	322-331	CACCGCCCAC	-	5.33e-07
CsBAG2	orange1.1g012625m.g	MYB_related	1	1905-1918	CGGAAAATATCTTA	-	1.17e-06
CsBAG2	orange1.1g004792m.g	ARF	1	1691-1700	TGCCGACAGG	-	1.22e-06
CsBAG2	orange1.1g004262m.g	MYB_related	1	1907-1916	AGATATTTTC	+	3.86e-06
CsBAG2	orange1.1g003544m.g	ARF	1	1691-1699	CCTGTCGGC	+	5.15e-07
CsBAG3	orange1.1g048459m.g	C2H2	9	1109-1127,1175-1193,1178-1196,1181-1199,443-461,446-464,524-542,797-815,800-818	CCTTTTCTTTATCATCTTC,TTTCAACCTCCCCTTCCTC,TCTTTTCAACCTCCCCTTC,CTTTCTTTTCAACCTCCCC,CTTCCTTCTCTTCTTTCTC,CCTTCTCTTCTTTCTCACC,CATTATGCTCCTCCTCTAC,TCTCCTGCTCCGCCACCTC,CCTTCTCCTGCTCCGCCAC	-,-,-,-,+,+,+,-,-	0.00000979,0.000000532,0.0000059,0.00000327,0.000000104,0.00000281,0.0000047,0.000000541,0.0000000424
CsBAG3	orange1.1g047455m.g	ERF	3	463-483,789-809,792-812	CCTGCACCGCCATTTTTTCTA,GCTCCGCCACCTCTGATTCAA,CCTGCTCCGCCACCTCTGATT	+,-,-	0.00000302,0.00000304,0.000000313
CsBAG3	orange1.1g047334m.g	ERF	4	1927-1947,460-480	CCCCCTCAGCCGCCTTTTTTT,TCACCTGCACCGCCATTTTTT,CCTGCTCCGCCACCTCTGATT,TCTCCTGCTCCGCCACCTCTG	-,+,-,-	0.000000619,0.0000058,0.00000167,0.000000867
CsBAG3	orange1.1g045963m.g	ERF	1	1929-1943	AAAAAGGCGGCTGAG	+	3.77e-06
CsBAG3	orange1.1g045783m.g	ERF	6	1930-1950,1933-1953,454-474,795-815,798-818,801-821	TTGCCCCCTCAGCCGCCTTTT,CAGTTGCCCCCTCAGCCGCCT,TCTTTCTCACCTGCACCGCCA,TCTCCTGCTCCGCCACCTCTG,CCTTCTCCTGCTCCGCCACCT,GAACCTTCTCCTGCTCCGCCA	-,-,+,-,-,-	0.00000212,0.0000000968,0.00000112,	0.00000235,0.0000000353,0.0000018
CsBAG3	orange1.1g045031m.g	B3	1	1630-1644	ACTGATGAAGCAGAA	-	8.63e-06
CsBAG3	orange1.1g044016m.g	ERF	3	1933-1947,460-474,798-812	CCCCCTCAGCCGCCT,TCACCTGCACCGCCA,CCTGCTCCGCCACCT	-,+,-	0.00000565,0.00000678,0.00000234
CsBAG3	orange1.1g043614m.g	ERF	4	1933-1947,460-474	CCCCCTCAGCCGCCT,TCACCTGCACCGCCA,GCTCCGCCACCTCTG,CCTGCTCCGCCACCT	-,+,-,-	0.000000384,0.00000253,0.00000703,0.000000789
CsBAG3	orange1.1g043131m.g	GRAS	1	42-61	CAAAGGAAGAGGAAAACAAA	-	7.18e-06
CsBAG3	orange1.1g042353m.g	ERF	2	463-473,799-809	CCTGCACCGCC,GCTCCGCCACC	+,-	0.00000248,0.00000779
CsBAG3	orange1.1g039680m.g	ERF	1	454-473	TCTTTCTCACCTGCACCGCC	+	7.27e-07
CsBAG3	orange1.1g039409m.g	ERF	2	1920-1947,788-815	CCCCCTCAGCCGCCTTTTTTTTACTCAG,TCTCCTGCTCCGCCACCTCTGATTCAAA	-,-	0.000000191,0.00000423
CsBAG3	orange1.1g039390m.g	ERF	1	793-811	ATCAGAGGTGGCGGAGCAG	+	9.76e-06
CsBAG3	orange1.1g037347m.g	ERF	4	1932-1948,459-475	AAGGCGGCTGAGGGGGC,ATGGCGGTGCAGGTGAG,GAGGTGGCGGAGCAGGA,GTGGCGGAGCAGGAGAA	+,-,+,+	0.0000000417,0.00000207,0.00000099,0.00000155
CsBAG3	orange1.1g037093m.g	ERF	2	790-810,793-813	TGCTCCGCCACCTCTGATTCA,TCCTGCTCCGCCACCTCTGAT	-,-	0.00000312,0.00000171
CsBAG3	orange1.1g036845m.g	LBD	4	1931-1951,793-813,796-816,799-819	GTTGCCCCCTCAGCCGCCTTT,TCCTGCTCCGCCACCTCTGAT,TTCTCCTGCTCCGCCACCTCT,ACCTTCTCCTGCTCCGCCACC	-,-,-,-	0.00000646,0.00000191,0.00000168,0.000000157
CsBAG3	orange1.1g036655m.g	ERF	4	1933-1947,460-474	CCCCCTCAGCCGCCT,TCACCTGCACCGCCA,GCTCCGCCACCTCTG,CCTGCTCCGCCACCT	-,+,-,-	0.00000123,0.000000397,0.00000932,0.00000151
CsBAG3	orange1.1g036154m.g	ERF	1	1934-1941	CAGCCGCC	-	8.96e-06
CsBAG3	orange1.1g035756m.g	ERF	5	1488-1507，1933-1952，795-814，798-817，801-820	CATCTCCACCGAAGACGTCG，AGTTGCCCCCTCAGCCGCCT，CTCCTGCTCCGCCACCTCTG，CTTCTCCTGCTCCGCCACCT，AACCTTCTCCTGCTCCGCCA	+,-,-,-,-	0.00000922,0.00000232,0.00000305,0.00000048,	3.75e-07
CsBAG3	orange1.1g032112m.g	GATA	1	1103-1121	CTTTATCATCTTCACCATG	-	6.96e-06
CsBAG3	orange1.1g031669m.g	ERF	1	461-477	AAATGGCGGTGCAGGTG	-	6.5e-06
CsBAG3	orange1.1g029507m.g	ERF	4	1489-1507,462-480	CGACGTCTTCGGTGGAGAT,AAAAAATGGCGGTGCAGGT,AATCAGAGGTGGCGGAGCA,CAGAGGTGGCGGAGCAGGA	-,-,+,+	0.00000143,0.00000578,0.00000379,0.000000124
CsBAG3	orange1.1g028913m.g	ERF	7	1931-1951,1934-1954,790-810,793-813,796-816,799-819,802-822	GTTGCCCCCTCAGCCGCCTTT,TCAGTTGCCCCCTCAGCCGCC,TGCTCCGCCACCTCTGATTCA,TCCTGCTCCGCCACCTCTGAT,TTCTCCTGCTCCGCCACCTCT,ACCTTCTCCTGCTCCGCCACC,GGAACCTTCTCCTGCTCCGCC	-,-,-,-,-,-,-	0.0000062,0.00000197,0.00000283,0.000000471,0.000000154,0.000000169,0.00000262
CsBAG3	orange1.1g027691m.g	MIKC_MADS	4	1716-1736,1718-1738,40-60,41-61	CTTTTTTCTCTGTTTTCTTTC,GGCTTTTTTCTCTGTTTTCTT,GTTTTGTTTTCCTCTTCCTTT,TTTTGTTTTCCTCTTCCTTTG	-,-,+,+	0.00000257,0.00000621,0.0000088,0.0000087
CsBAG3	orange1.1g027472m.g	LBD	2	795-815,798-818	TCTCCTGCTCCGCCACCTCTG,CCTTCTCCTGCTCCGCCACCT	-,-	0.000003,0.00000726
CsBAG3	orange1.1g026385m.g	ERF	4	1929-1943,464-478,794-808,797-811	AAAAAGGCGGCTGAG,AAAATGGCGGTGCAG,TCAGAGGTGGCGGAG,GAGGTGGCGGAGCAG	+,-,+,+	0.00000364,0.0000062,0.00000317,0.000000537
CsBAG3	orange1.1g024771m.g	GATA	2	1929-1943,464-478,794-808,797-811	ATGGTGAAGATGATA,ATGGCGGTGCAGGTG	+,-	0.00000621,0.000000462
CsBAG3	orange1.1g024428m.g	TALE	1	797-816	TTCTCCTGCTCCGCCACCTC	-	5.12e-06
CsBAG3	orange1.1g023215m.g	bHLH	1	1392-1402	GGCAAGTGGAA	+	4.69e-06
CsBAG3	orange1.1g023169m.g	ERF	1	1933-1947	CCCCCTCAGCCGCCT	-	7.93e-07
CsBAG3	orange1.1g023148m.g	ERF	1	460-474	TGGCGGTGCAGGTGA	-	2.39e-06
CsBAG3	orange1.1g020391m.g	ERF	3	1924-1944,463-483 ,792-812	GTAAAAAAAAGGCGGCTGAGG,TAGAAAAAATGGCGGTGCAGG,AATCAGAGGTGGCGGAGCAGG	+,-,+	0.0000014,0.00000211,0.00000273
CsBAG3	orange1.1g020302m.g	SBP	1	1138-1153	ATTTCCGTACCCCTTT	+	1.55e-07
CsBAG3	orange1.1g020146m.g	HSF	1	847-858	GAAGGTTCCATA	-	7.42e-06
CsBAG3	orange1.1g019546m.g	ERF	1	802-822	GGCGGAGCAGGAGAAGGTTCC	+	7.93e-06
CsBAG3	orange1.1g018007m.g	bHLH	1	1392-1402	TTCCACTTGCC	-	2.79e-06
CsBAG3	orange1.1g015337m.g	bHLH	1	1391-1404	ATTTCCACTTGCCT	-	4.61e-06
CsBAG3	orange1.1g007598m.g	NAC	1	1654-1665	GAGCACGCCACA	+	7.54e-07
CsBAG3	orange1.1g002317m.g	Nin-like	2	394-40,553-567	GTTGCAGCAGCCATG,GGAGCAGCAGAGGTA	-,+	0.00000233,0.000000957
CsBAG4.1	orange1.1g048459m.g	C2H2	2	1895-1913,1898-1916	TTTCCTTTTCCTCTTTCTC,CCTTTTCCTCTTTCTCATC	+,+	0.00000101,0.000000306
CsBAG4.1	orange1.1g047290m.g	Dof	1	929-949	AAAAAAAAAAAAAAGTGAATA	-	9.15e-09
CsBAG4.1	orange1.1g046549m.g	Dof	2	1850-1870,926-946	AAAAAAAAAAAGAAAGAAGAA,AAAAAAAAAAAGTGAATAATC	-,-	0.000000687,0.00000373
CsBAG4.1	orange1.1g043131m.g	GRAS	1	1797-1816	AAGGAAACGAGCAAGGAAAA	-	9.35e-06
CsBAG4.1	orange1.1g038243m.g	AP2	19	1849-1868,1852-1871,1854-1873,1856-1875,1858-1877,1906-1925,932-951,934-953,935-945,936-955,937-956,938-957,939-958,940-959,941-960,942-961,943-962,944-963,945-964	AAAAAAAAAGAAAGAAGAAA,AAAAAAAAAAAAGAAAGAAG,AAAAAAAAAAAAAAGAAAGA,TAAAAAAAAAAAAAAAGAAA,ACTAAAAAAAAAAAAAAAGA,AGGAGAAAAGATGAGAAAGA,AAAAAAAAAAAAAAAAGTGA,AAAAAAAAAAAAAAAAAAGT,AAAAAAAAAAAAAAAAAAAG,AAAAAAAAAAAAAAAAAAAAAAAAAAAAAAAAAAAAAAAA,AAAAAAAAAAAAAAAAAAAA,AAAAAAAAAAAAAAAAAAAA,AAAAAAAAAAAAAAAAAAAA,AAAAAAAAAAAAAAAAAAAA,GAAAAAAAAAAAAAAAAAAA,AGAAAAAAAAAAAAAAAAAA,CAGAAAAAAAAAAAAAAAAA,ACAGAAAAAAAAAAAAAAAA	-,-,-,-,-,-,-,-,-,-,-,-,-,-,-,-,-,-,-	0.000000374,0.0000000159,0.0000000311,0.0000000773,0.00000489,0.00000789,0.0000005,0.00000539,0.000000184,0.000000132,0.000000132,0.000000132,0.000000132,0.000000132,0.000000132,0.000000331,0.000000292,0.000001,0.00000339
CsBAG4.1	orange1.1g037998m.g	MYB	1	529-549	GGAAAAAAGTTTGGTGGAGCA	+	5.09e-06
CsBAG4.1	orange1.1g037149m.g	MIKC_MADS	1	955-973	ATTCCAATAACAGAAAAAA	-	8.11e-06
CsBAG4.1	orange1.1g036087m.g	MYB	1	526-546	AAAGGAAAAAAGTTTGGTGGA	+	6.88e-06
CsBAG4.1	orange1.1g029507m.g	ERF	1	1542-1560	CGGATATTTCGGTGGAGTA	+	6.53e-06
CsBAG4.1	orange1.1g027691m.g	MIKC_MADS	23	1609-1629,1795-1815,1849-1869,1850-1870,1852-1872,1853-1873,1854-1874 ,1855-1875,1856-1876,1865-1885,1894-1914,932-952,935-955,936-956,937-957,938-958,939-959,940-960,941-961,942-962,943-963,944-964,946-966	TTTTGATTTTTCTTTCCTTTC,TTTTTTCCTTGCTCGTTTCCT,TTTCTTCTTTCTTTTTTTTTT,TTCTTCTTTCTTTTTTTTTTT,CTTCTTTCTTTTTTTTTTTTT,TTCTTTCTTTTTTTTTTTTTT,TCTTTCTTTTTTTTTTTTTTT,CTTTCTTTTTTTTTTTTTTTA,TTTCTTTTTTTTTTTTTTTAG,TTTTTTTTTTAGTTTCTTCTC,CTTTCCTTTTCCTCTTTCTCA,TCACTTTTTTTTTTTTTTTTT,CTTTTTTTTTTTTTTTTTTTT,TTTTTTTTTTTTTTTTTTTTT,TTTTTTTTTTTTTTTTTTTTT,TTTTTTTTTTTTTTTTTTTTT,TTTTTTTTTTTTTTTTTTTTT,TTTTTTTTTTTTTTTTTTTTT,TTT…	+,+,+,+,+,+,+,+,+,+,+,+,+,+,+,+,+,+,+,+,+,+,+	0.00000707,0.00000707,0.000000347,0.0000000633,0.0000000371,0.000000205,0.0000000232,0.000000988,0.000000582,0.00000812,0.00000268,0.00000306,0.0000000276,0.0000000154,0.0000000154,0.0000000154,0.0000000154,0.0000000154,0.0000000517,0.00000000991,0.000000147,0.000000185,0.00000168
CsBAG4.1	orange1.1g024786m.g	Dof	1	1901-1921	TTTCCTCTTTCTCATCTTTTC	+	5.73e-06
CsBAG4.1	orange1.1g024428m.g	TALE	1	1573-1592	CTTTCCAGTTCTGCCGCTGG	+	3.99e-06
CsBAG4.1	orange1.1g022806m.g	BBR-BPC	1	1900-1923	GAGAAAAGATGAGAAAGAGGAAAA	-	1.53e-06
CsBAG4.1	orange1.1g021633m.g	Dof	3	1853-1873,1893-1913,929-949	AAAAAAAAAAAAAAGAAAGAA,GAGAAAGAGGAAAAGGAAAGT,AAAAAAAAAAAAAAGTGAATA	-,-,-	0.00000166,0.00000123,0.0000000664
CsBAG4.1	orange1.1g021503m.g	MYB	1	532-546	AAAAAGTTTGGTGGA	+	1.06e-06
CsBAG4.1	orange1.1g021498m.g	MYB	1	535-547	AAGTTTGGTGGAG	+	2.51e-06
CsBAG4.1	orange1.1g019668m.g	Dof	14	1851-1871,1855-1875,1895-1915.931-951,935-955,936-956,937-957 ,938-958, 939-959 ,940-960 ,941-961 ,942-962 ,943-963 ,944-964	TCTTCTTTCTTTTTTTTTTTT,CTTTCTTTTTTTTTTTTTTTA,TTTCCTTTTCCTCTTTCTCAT,TTCACTTTTTTTTTTTTTTTT,CTTTTTTTTTTTTTTTTTTTT,TTTTTTTTTTTTTTTTTTTTT,TTTTTTTTTTTTTTTTTTTTT,TTTTTTTTTTTTTTTTTTTTT,TTTTTTTTTTTTTTTTTTTTT,TTTTTTTTTTTTTTTTTTTTT,TTTTTTTTTTTTTTTTTTTTC,TTTTTTTTTTTTTTTTTTTCT,TTTTTTTTTTTTTTTTTTCTG,TTTTTTTTTTTTTTTTTCTGT	+,+,+,+,+,+,+,+,+,+,+,+,+,+	0.000001,0.0000000433,0.00000174,0.000000000977,0.00000197,0.000000823,0.000000823,0.000000823,0.000000823,0.000000823,0.00000247,0.00000185,0.00000784,0.00000929
CsBAG4.1	orange1.1g019546m.g	ERF	1	1537-1557	GGCTTCGGATATTTCGGTGGA
CsBAG4.1	orange1.1g017665m.g	NAC	1	1815-1829	TAGTTACGTGAACAA	-	7.52e-06
CsBAG4.1	orange1.1g011752m.g	Dof	1	929-947	AAAAAAAAAAAAGTGAATA	-	7.4e-08
CsBAG5	orange1.1g046549m.g	Dof	1	1630-1650	TAAACAAAAAAGTAAATCAAG	-	7.85e-06
CsBAG5	orange1.1g046416m.g	SBP	1	350-360	CTTGTACGGTT	-	2.81e-06
CsBAG5	orange1.1g044652m.g	bHLH	1	1965-1972	CCACGTGC	+	2.96e-06
CsBAG5	orange1.1g043122m.g	WRKY	1	691-703	CAAAGTCAACTAC	+	8.98e-06
CsBAG5	orange1.1g040096m.g	MIKC_MADS	1	1299-1312	ACAAAAATAGAAAA	+	3.5e-06
CsBAG5	orange1.1g038669m.g	C2H2	1	662-672	CACTGTCACTA	+	2.15e-06
CsBAG5	orange1.1g038243m.g	AP2	3	174-193,176-195,177-196	CAAAAGAAGGAAAAAAAAAA,AAAGAAGGAAAAAAAAAAAA,AAGAAGGAAAAAAAAAAAAA	+,+,+	0.00000609,0.00000734,0.000000561
CsBAG5	orange1.1g036669m.g	bHLH	1	1964-1972	GCCACGTGC	+	1.54e-06
CsBAG5	orange1.1g036452m.g	MIKC_MADS	1	1296-1314	ATTTTTCTATTTTTGTAAT	-	8.72e-06
CsBAG5	orange1.1g036344m.g	MYB	1	1824-1836	GGCTGGTCGGTGT	-	4.2e-06
CsBAG5	orange1.1g029068m.g	ERF	1	1707-1720	TTGGACGGTGATAT	-	7.52e-06
CsBAG5	orange1.1g028060m.g	bHLH	2	1964-1973,1964-1973	GCCACGTGCC,GGCACGTGGC	+,-	0.000000269,0.000000269
CsBAG5	orange1.1g027691m.g	MIKC_MADS	3	1301-1321,174-194 ,175-195	TTTTTTCATTTTTCTATTTTT,TTTTTTTTTTTCCTTCTTTTG,TTTTTTTTTTTTCCTTCTTTT	-,-,-	0.00000378,0.0000000633,0.00000027
CsBAG5	orange1.1g027470m.g	MIKC_MADS	1	1297-1311	TTACAAAAATAGAAA	+	3.72e-06
CsBAG5	orange1.1g024786m.g	Dof	1	174-194	TTTTTTTTTTTCCTTCTTTTG	-	2.49e-06
CsBAG5	orange1.1g024344m.g	bHLH	2	1958-1978,1959-1979	AACTGGGCACGTGGCGGAACC,GTTCCGCCACGTGCCCAGTTG	-,+	0.00000256,0.00000158
CsBAG5	orange1.1g022880m.g	C3H	1	209-222	AAGGAAAAAGCTAA	+	4.29e-06
CsBAG5	orange1.1g022353m.g	WRKY	1	691-701	CAAAGTCAACT	+	7.79e-06
CsBAG5	orange1.1g021633m.g	Dof	1	204-224	GATTTAAGGAAAAAGCTAAAA	+	3.82e-06
CsBAG5	orange1.1g021598m.g	WRKY	1	691-703	GTAGTTGACTTTG	-	4.72e-06
CsBAG5	orange1.1g020831m.g	WRKY	1	520-534	TGCCTTGACCTTGCT	+	8.53e-06
CsBAG5	orange1.1g020338m.g	C3H	1	1899-1913	CCGAAAAACAAGGGC	-	8.77e-06
CsBAG5	orange1.1g019668m.g	Dof	1	174-194	TTTTTTTTTTTCCTTCTTTTG	-	8.16e-06
CsBAG5	orange1.1g019485m.g	bHLH	1	1964-1981	TCCAACTGGGCACGTGGC	-	9.95e-06
CsBAG5	orange1.1g019404m.g	WRKY	1	690-703	GTAGTTGACTTTGA	-	4.42e-06
CsBAG5	orange1.1g019375m.g	WRKY	1	691-703	GTAGTTGACTTTG	-	2.66e-06
CsBAG5	orange1.1g019126m.g	WRKY	1	691-703	CAAAGTCAACTAC	+	1.69e-06
CsBAG5	orange1.1g018659m.g	WRKY	1	691-701	CAAAGTCAACT	+	4.08e-06
CsBAG5	orange1.1g018215m.g	WRKY	1	690-703	GTAGTTGACTTTGA	-	3.01e-06
CsBAG5	orange1.1g017895m.g	WRKY	1	691-701	CAAAGTCAACT	+	5.86e-06
CsBAG5	orange1.1g017798m.g	ERF	2	1825-1834,576-585	CACCGACCAG,CGCCGTCCAT	+,+	0.0000012，0.00000709
CsBAG5	orange1.1g015616m.g	WRKY	1	691-703	GTAGTTGACTTTG	-	2.1e-06
CsBAG5	orange1.1g014374m.g	bHLH	1	1960-1980	CCAACTGGGCACGTGGCGGAA	-	7.64e-06
CsBAG5	orange1.1g014090m.g	bHLH	1	1965-1978	AACTGGGCACGTGG	-	5.96e-06
CsBAG5	orange1.1g013222m.g	WRKY	1	691-701	CAAAGTCAACT	+	9.95e-06
CsBAG5	orange1.1g012387m.g	bHLH	1	1965-1972	CCACGTGC	+	2.96e-06
CsBAG5	orange1.1g012156m.g	bHLH	2	1964-1973,1964-1973	GCCACGTGCC,GGCACGTGGC	+,-	0.00000242,0.00000242
CsBAG5	orange1.1g009051m.g	WRKY	1	691-701	CAAAGTCAACT	+	9.84e-06
CsBAG5	orange1.1g007099m.g	WRKY	1	691-711	GTTGACTGGTAGTTGACTTTG	-	2.68e-07
CsBAG5	orange1.1g006040m.g	bHLH	1	1965-1974	GGGCACGTGG	-	3.75e-06
CsBAG5	orange1.1g005715m.g	BES1	1	1963-1977	CGCCACGTGCCCAGT	+	6.16e-06
CsBAG6	orange1.1g048459m.g	C2H2	3	1203-1221,1206-1224,1209-1227	TCTCTTCTTCCTCTTTCTC,CACTCTCTTCTTCCTCTTT,TATCACTCTCTTCTTCCTC	-,-,-	0.000000156,0.00000858,0.00000477
CsBAG6	orange1.1g046549m.g	Dof	1	1203-1221,1206-1224,1209-1227	AGCAAGAAAAAGAAGAACGAA	+	5.56e-06
CsBAG6	orange1.1g045783m.g	ERF	1	778-798	CCGCCTACGTCCACGCCTCCA	-	1.87e-06
CsBAG6	orange1.1g043131m.g	GRAS	2	1001-1020,1201-1220	AGTGGAAGAGCAAAGAAGA,TAGAGAAAGAGGAAGAAGAG	+,+	0.00000574,0.00000854
CsBAG6	orange1.1g042649m.g	bHLH	1	646-659	TGTGAGACACTTGA	+	9.33e-06
CsBAG6	orange1.1g039409m.g	ERF	1	780-807	CGGCAATCTCCGCCTACGTCCACGCCTC	-	5.74e-06
CsBAG6	orange1.1g039390m.g	ERF	1	1708-1726	GAAGTTGGATGCGGCCCCG	+	9.02e-06
CsBAG6	orange1.1g038669m.g	C2H2	1	1220-1230	CACTATCACTC	-	1.61e-06
CsBAG6	orange1.1g038243m.g	AP2	2	1007-1026,1206-1225	AAGAGCAAAGAAGAAAGAGG，AAAGAGGAAGAAGAGAGTGA	+,+	0.00000159，0.00000207
CsBAG6	orange1.1g037093m.g	ERF	1	782-802	ATCTCCGCCTACGTCCACGCC	-	7.31e-06
CsBAG6	orange1.1g036845m.g	LBD	1	779-799	TCCGCCTACGTCCACGCCTCC	-	1.82e-07
CsBAG6	orange1.1g036087m.g	MYB	1	1419-1439	TTGAAAAACATGTTTGGTGGG	-	9.25e-06
CsBAG6	orange1.1g035756m.g	ERF	2	778-797,781-800	CGCCTACGTCCACGCCTCCA,CTCCGCCTACGTCCACGCCT	-,-	0.00000162，0.00000761
CsBAG6	orange1.1g028913m.g	MIKC_MADS	1	779-799	TCCGCCTACGTCCACGCCTCC	-	5.97e-06
CsBAG6	orange1.1g027691m.g	MIKC_MADS	3	1006-1026,1058-1078,1202-1222	CCTCTTTCTTCTTTGCTCTTC,TTCTTCTTTTTCTTGCTCTTC,CTCTCTTCTTCCTCTTTCTCT	-,-,-	0.00000592,0.00000105,0.00000261
CsBAG6	orange1.1g027472m.g	LBD	1	781-801	TCTCCGCCTACGTCCACGCCT	-	5.73e-07
CsBAG6	orange1.1g024344m.g	bHLH	1	1664-1684	CGTTTGACACGTGGATCTCGC	-	2.17e-06
CsBAG6	orange1.1g023215m.g	bHLH	1	526-536	TGCAAGTTGTA	-	5.96e-06
CsBAG6	orange1.1g022806m.g	BBR-BPC	3	1001-1024,1003-1026,1210-1233	GAGTGGAAGAGCAAAGAAGAAAGA,GTGGAAGAGCAAAGAAGAAAGAGG,AGGAAGAAGAGAGTGATAGTGAGT	+,+,+	0.00000116,0.00000574,0.00000179
CsBAG6	orange1.1g022743m.g	Trihelix	1	1670-1686	TCCACGTGTCAAACGAT	+	4.69e-06
CsBAG6	orange1.1g021635m.g	NAC	1	838-852	CTTCTCCCTTACTCT	+	9.17e-06
CsBAG6	orange1.1g021503m.g	MYB	1	1419-1433	AACATGTTTGGTGGG	-	1.58e-06
CsBAG6	orange1.1g021498m.g	MYB	1	1418-1430	ATGTTTGGTGGGC	-	8.36e-06
CsBAG6	orange1.1g021111m.g	TCP	1	1719-1727	CGGCCCCGC	+	7.11e-06
CsBAG6	orange1.1g020697m.g	bZIP	1	1666-1680	GAGATCCACGTGTCA	+	9.94e-06
CsBAG6	orange1.1g019546m.g	ERF	2	779-799,782-802	GGAGGCGTGGACGTAGGCGGA,GGCGTGGACGTAGGCGGAGAT	+,+	0.000000456,0.00000184
CsBAG6	orange1.1g019413m.g	Trihelix	1	1986-1996	TCGTCGGAAAA	-	8.74e-06
CsBAG6	orange1.1g019057m.g	Trihelix	1	1483-1500	TATCAAACAGGCCCTAAA	+	1.91e-06
CsBAG6	orange1.1g018605m.g	bZIP	1	1671-1680	CCACGTGTCA	+	7.49e-06
CsBAG6	orange1.1g018368m.g	BBR-BPC	1	1168-1188	ATATCTCTCCCTCTAACTCGA	-	3.28e-06
CsBAG6	orange1.1g016692m.g	HSF	1	1869-1883	TGAAAGTTCGAGAAG	-	6.69e-06
CsBAG6	orange1.1g014090m.g	bHLH	1	1671-1684	CGTTTGACACGTGG	-	8.88e-06
CsBAG6	orange1.1g011938m.g	MYB	1	389-401	TCCATAACCGTAA	+	2.19e-06
CsBAG6	orange1.1g011077m.g	HSF	1	1865-1876	GAAACTTCTCGA	+	5.84e-06
CsBAG6	orange1.1g002317m.g	Nin-like	3	983-997,986-1000,989-1003	ATTTCAGCAGCAGCA,TCAGCAGCAGCACGC,GCAGCAGCACGCGAG	+,+,+	0.00000949,0.000000205,0.00000351
CsBAG6	orange1.1g002144m.g	Nin-like	1	1731-1745	TTTTGGCTCTTGGAT	-	4.46e-06
CsBAG7	orange1.1g048287m.g	C2H2	1	1850-1869	CAGAAGAGGACAAAATTTGT	-	1.92e-06
CsBAG7	orange1.1g047455m.g	ERF	1	904-924	TCTCAACCGCCACATGATCGA	+	7.84e-06
CsBAG7	orange1.1g047334m.g	ERF	1	901-921	ACGTCTCAACCGCCACATGAT	+	8.65e-06
CsBAG7	orange1.1g047290m.g	Dof	2	745-765,753-773	AAAAAAGAAAAAAAGCGACTA,GAAAAAAGAAAAAAGAAAAAA	-,-	0.00000347,0.000000662
CsBAG7	orange1.1g046549m.g	Dof	1	1062-1082	AGCAAGAAAAAGAAGAACGAA	+	5.56e-06
CsBAG7	orange1.1g045963m.g	ERF	1	469-483	AGAAAAGCGGCGGCA	-	1.79e-06
CsBAG7	orange1.1g045031m.g	B3	1	448-462	CATGATGAAGAAGAA	-	3.56e-06
CsBAG7	orange1.1g043131m.g	GRAS	2	1850-1869,755-774	CAGAAGAGGACAAAATTTGT,GGAAAAAAGAAAAAAGAAAA	-,-	0.00000561,0.00000779
CsBAG7	orange1.1g042353m.g	ERF	1	468-478	ATGCCGCCGCT	+	8.06e-06
CsBAG7	orange1.1g039708m.g	MYB	1	956-970	AAGCGTAACCGTCAC	+	7.32e-06
CsBAG7	orange1.1g039409m.g	ERF	1	1747-1774	ATCGTATCGCCGCCTACAACAGTCACTT	+	5.21e-06
CsBAG7	orange1.1g038451m.g	bHLH	1	1574-1587	CACGTGATCGCCAA	-	4.53e-06
CsBAG7	orange1.1g038243m.g	AP2	7	433-452,436-455,751-770,752-771,753-772,754-773,756-775	AAGAAAAGAAATAAAAGAGG,AAGAAGAAAAGAAATAAAAG,AAAAGAAAAAAGAAAAAAAG,AAAAAGAAAAAAGAAAAAAA,AAAAAAGAAAAAAGAAAAAA,GAAAAAAGAAAAAAGAAAAA,TGGAAAAAAGAAAAAAGAAA	-,-,-,-,-,-,-	0.00000895,0.00000936,0.00000178,0.000000908,0.00000106,0.0000056,0.000000341
CsBAG7	orange1.1g037347m.g	ERF	1	900-916	AAGAAAAGAAATAAAAGAGG,AAGAAGAAAAGAAATAAAAG,AAAAGAAAAAAGAAAAAAAG,AAAAAGAAAAAAGAAAAAAA,AAAAAAGAAAAAAGAAAAAA,GAAAAAAGAAAAAAGAAAAA,TGGAAAAAAGAAAAAAGAAA	-	1.86e-06
CsBAG7	orange1.1g036154m.g	ERF	1	1753-1760	TCGCCGCC	+	3.27e-06
CsBAG7	orange1.1g030994m.g	ERF	1	1754-1761	CGCCGCCT	+	7.27e-06
CsBAG7	orange1.1g028913m.g	ERF	1	897-917	GGAGACGTCTCAACCGCCACA	+	6.12e-06
CsBAG7	orange1.1g027691m.g	MIKC_MADS	7	434-454,749-769,750-770,753-773,754-774,755-775,756-776	CTCTTTTATTTCTTTTCTTCT,CGCTTTTTTTCTTTTTTCTTT,GCTTTTTTTCTTTTTTCTTTT,TTTTTTCTTTTTTCTTTTTTC,TTTTTCTTTTTTCTTTTTTCC,TTTTCTTTTTTCTTTTTTCCA,TTTCTTTTTTCTTTTTTCCAG	+,+,+,+,+,+,+	0.00000724,0.00000424,0.00000102,0.0000000391,0.000000144,0.00000104,0.00000962
CsBAG7	orange1.1g025382m.g	ERF	1	1753-1760	TCGCCGCC	+	8.12e-06
CsBAG7	orange1.1g024786m.g	Dof	2	430-450,751-771	ATCCCTCTTTTATTTCTTTTC,CTTTTTTTCTTTTTTCTTTTT	+,+	0.00000836,0.000000162
CsBAG7	orange1.1g022880m.g	C3H	1	168-181	AAAGAAAAAGCTGA	-	7.16e-06
CsBAG7	orange1.1g021633m.g	Dof	2	745-765,753-773	AAAAAAGAAAAAAAGCGACTA	-,-	0.00000597，0.0000000531
CsBAG7	orange1.1g019668m.g	Dof	3	203-223,747-767,755-775	CAAACTTTTTTTTTTTTTTTA,GTCGCTTTTTTTCTTTTTTCT,TTTTCTTTTTTCTTTTTTCCA	+,+,+	0.00000251,0.000000146,0.000000114
CsBAG7	orange1.1g019485m.g	bHLH	1	1580-1597	CTGACCCCACCACGTGAT	-	8.31e-06
CsBAG7	orange1.1g018746m.g	MYB	1	903-917	GTCTCAACCGCCACA	+	1.73e-06
CsBAG7	orange1.1g012387m.g	bHLH	1	1581-1588	CCACGTGA	-	8.49e-06
CsBAG7	orange1.1g012287m.g	bZIP	1	1578-1589	CGATCACGTGGT	+	5.85e-06
CsBAG7	orange1.1g011938m.g	MYB	1	957-969	AGCGTAACCGTCA	+	2.4e-06
CsBAG7	orange1.1g011752m.g	Dof	2	745-763,753-771	AAAAAAGAAAAAAAGCGACTA,GAAAAAAGAAAAAAGAAAAAA	-,-	0.00000424,0.00000651
CsBAG7	orange1.1g011334m.g	C2H2	1	1850-1869	ACAAATTTTGTCCTCTTCTG	+	6.67e-07
CsBAG7	orange1.1g010389m.g	C2H2	1	1853-1869	CAGAAGAGGACAAAATT	-	8.18e-07
CsBAG7	orange1.1g007898m.g	C2H2	1	1852-1869	CAGAAGAGGACAAAATTT	-	8.04e-07
CsBAG7	orange1.1g007797m.g	bHLH	1	1581-1588	TCACGTGG	+	5.54e-06
CsBAG7	orange1.1g007393m.g	NAC	1	1028-1042	CTTGGCAAATAAGGA	-	3.78e-06
CsBAG7	orange1.1g006491m.g	C2H2	1	1854-1869	ATTTTGTCCTCTTCTG	+	4.38e-07
CsBAG7	orange1.1g001406m.g	CAMTA	1	1736-1744	TCGCCGCGT	-	6.22e-06
CsBAG8	orange1.1g048817m.g	bHLH	1	494-501	ACACGTGC	-	8.49e-06
CsBAG8	orange1.1g048459m.g	C2H2	3	299-317,301-319,304-322	CCACCCCCCCTCCCCCCCC,ACCCCCCCTCCCCCCCCAC,CCCCCTCCCCCCCCACATT	+,+,+	0.00000293,0.000000425,0.00000112
CsBAG8	orange1.1g047455m.g	ERF	1	1346-1366	CAAAAGCCGCCAAAGCTTCCG	-	5e-06
CsBAG8	orange1.1g047290m.g	Dof	3	1574-1594,1894-1914,553-573	TGAAGAGAGAAAAAGGAGAAG,AAACAGGAAAAAAAGCAAAAA,ACGAAAGAATAAAAGTGAAAA	-,-,+	0.00000274,0.00000585,0.00000141
CsBAG8	orange1.1g046859m.g	MYB	1	1945-1959	GTTCTGTAACGGAAA	+	5.17e-06
CsBAG8	orange1.1g046549m.g	Dof	3	1571-1591,1891-1911,556-576	AGAGAGAAAAAGGAGAAGGGT,CAGGAAAAAAAGCAAAAACTC,AAAGAATAAAAGTGAAAAAAA	-,-,+	0.000000839,0.00000912,0.00000536
CsBAG8	orange1.1g045509m.g	WRKY	1	1717-1726	AGAGTCAACG	-	6.7e-06
CsBAG8	orange1.1g045031m.g	B3	1	1145-1159	AATGATGAAGAGTAG	-	6.27e-06
CsBAG8	orange1.1g044652m.g	bHLH	1	462-469	CCACGTGC	+	2.96e-06
CsBAG8	orange1.1g043882m.g	bZIP	2	634-651,636-653	AAAAGAAAAAAAGCGACTA,AAAAAGAAAAAAGAAAAAA	+,-	0.00000104,0.00000193
CsBAG8	orange1.1g043131m.g	GRAS	2	1579-1598,1774-1793	GGGATGAAGAGAGAAAAAGG，GAGAGAGAGAGAGAGTCTAA	-,-	0.00000234,0.00000624
CsBAG8	orange1.1g042353m.g	ERF	1	508-518	CAGCCACCGAC	-	4.61e-06
CsBAG8	orange1.1g040096m.g	MIKC_MADS	1	1309-1322	ACCAAAGGGGAAAC	-	6.95e-06
CsBAG8	orange1.1g039680m.g	ERF	1	508-527	CTTCACAAACAGCCACCGAC	-	9.68e-07
CsBAG8	orange1.1g039409m.g	ERF	2	1342-1369,1728-1755	ATGCAAAAGCCGCCAAAGCTTCCGTTTA,AATAATAAGCCGCCTCCTCAGATCTCTT	-,-	0.00000342,0.00000318
CsBAG8	orange1.1g038451m.g	bHLH	1	47-60	CACGTGACTTTGCA	-	3.47e-06
CsBAG8	orange1.1g038243m.g	AP2	1	576-595	ATAAAAATAAAAAAGACAGG	+	8.79e-06
CsBAG8	orange1.1g036669m.g	bHLH	7	1277-1285,421-429	CCCACGTGT,CCCACGTGG,CCCACGTGG,GCCACGTGC,CGCACGTGG,GCCACGTGG,GCCACGTGG	+,+,-,+,-,+,-	0.00000302,0.00000103,0.00000103,0.00000154,0.00000502,0.0000045,0.0000045
CsBAG8	orange1.1g036655m.g	ERF	1	507-521	AAACAGCCACCGACA	-	7.17e-06
CsBAG8	orange1.1g036551m.g	bZIP	2	635-649,638-652	CGATGCCACGTGGCG,AAACGCCACGTGGCA	+,-	0.000000536,0.000000428
CsBAG8	orange1.1g031669m.g	ERF	1	504-520	GAGTGTCGGTGGCTGTT	+	2.39e-07
CsBAG8	orange1.1g030591m.g	ERF	1	504-518	GAGTGTCGGTGGCTG	+	3.61e-06
CsBAG8	orange1.1g029627m.g	ERF	1	502-516	GTGAGTGTCGGTGGC	+	3.7e-08
CsBAG8	orange1.1g029068m.g	ERF	1	505-518	AGTGTCGGTGGCTG	+	7.36e-06
CsBAG8	orange1.1g028060m.g	bHLH	6	461-470,461-470,53-62,53-62,639-648,639-648	GCCACGTGCG,CGCACGTGGC,GTCACGTGCG,CGCACGTGAC,GCCACGTGGC,GCCACGTGGC	+,-,+,-,,+,-	0.00000366,0.00000366,0.00000764,0.00000764,0.00000198,0.00000198
CsBAG8	orange1.1g027691m.g	MIKC_MADS	6	1573-1593,1575-1595,1898-1918,1902-1922,1904-1924,1906-1926	CCTTCTCCTTTTTCTCTCTTC,TTCTCCTTTTTCTCTCTTCAT,TGCTTTTTTTCCTGTTTTTCT,TTTTTTCCTGTTTTTCTTTAT,TTTTCCTGTTTTTCTTTATTT,TTCCTGTTTTTCTTTATTTGC	+,+,+,+,+,+	0.000000678,0.00000197,0.0000055,0.00000463,0.00000749,0.00000724
CsBAG8	orange1.1g027470m.g	MIKC_MADS	1	1310-1324	TAACCAAAGGGGAAA	-	6.9e-06
CsBAG8	orange1.1g025886m.g	HD-ZIP	1	1166-1178	ACAATGATTGGAT	+	2.03e-06
CsBAG8	orange1.1g024791m.g	ERF	1	504-518	GAGTGTCGGTGGCTG	+	7.73e-08
CsBAG8	orange1.1g024786m.g	Dof	2	1311-1331,1384-1404	TTCCCCTTTGGTTACCTTTTT,TGCCTTTCTTTTATGCTTTTT	+,+	0.00000358,0.000000315
CsBAG8	orange1.1g024563m.g	Trihelix	2	1032-1046,1093-1107	AGGTTCCGGCGAAGC,GGTTTCCGCCGATGG	+,-	0.00000603,0.00000275
CsBAG8	orange1.1g024428m.g	TALE	3	1777-1796,1779-1798,300-319	GACTCTCTCTCTCTCTCTCG,CTCTCTCTCTCTCTCTCGTG,CACCCCCCCTCCCCCCCCAC	+,+,+	0.00000684,0.000000643,0.000000565
CsBAG8	orange1.1g024344m.g	bHLH	6	415-435,416-436,455-475,456-476,633-653,634-654	CAGATCCCACGTGGGAGCCGT,CGGCTCCCACGTGGGATCTGC,TGTCTCGCACGTGGCATGCTG,AGCATGCCACGTGCGAGACAA,TAAACGCCACGTGGCATCGTC,ACGATGCCACGTGGCGTTTAC	-,+,-,+,-,+	0.000000558,0.00000199,0.00000857,0.00000575,0.00000468,0.00000191
CsBAG8	orange1.1g023148m.g	ERF	1	507-521	CAGATCCCACGTGGGAGCCGT,CGGCTCCCACGTGGGATCTGC,TGTCTCGCACGTGGCATGCTG,AGCATGCCACGTGCGAGACAA,TAAACGCCACGTGGCATCGTC,ACGATGCCACGTGGCGTTTAC	-,+,-,+,-,+	6.91e-07
CsBAG8	orange1.1g022880m.g	C3H	1	1576-1589	AGAGAAAAAGGAGA	-	3.11e-06
CsBAG8	orange1.1g022806m.g	BBR-BPC	7	1569-1592,1573-1596,1575-1598,1577-1600,1770-1793,1772-1795,1774-1797	AAGAGAGAAAAAGGAGAAGGGTTA,GATGAAGAGAGAAAAAGGAGAAGG,GGGATGAAGAGAGAAAAAGGAGAA,GTGGGATGAAGAGAGAAAAAGGAG,GAGAGAGAGAGAGAGTCTAAAATA,GAGAGAGAGAGAGAGAGTCTAAAA,ACGAGAGAGAGAGAGAGAGTCTAA	-,-,-,-,-,-,-	0.00000263,0.00000373,0.00000395,0.00000487,0.00000162,0.0000000187,0.0000000407
CsBAG8	orange1.1g022743m.g	Trihelix	1	1270-1286	AAGAGAGAAAAAGGAGAAGGGTTA,GATGAAGAGAGAAAAAGGAGAAGG,GGGATGAAGAGAGAAAAAGGAGAA,GTGGGATGAAGAGAGAAAAAGGAG,GAGAGAGAGAGAGAGTCTAAAATA,GAGAGAGAGAGAGAGAGTCTAAAA,ACGAGAGAGAGAGAGAGAGTCTAA	-	6.11e-06
CsBAG8	orange1.1g022353m.g	WRKY	1	1717-1727	GAGAGTCAACG	-	7.33e-06
CsBAG8	orange1.1g022148m.g	BES1	6	1210-1229,412-431	TCCCACGTGGGAGCCGTGCG,TCCCACGTGGGATCTGCGCT,TCGCACGTGGCATGCTGCTG,ACACACGTGCAGATCGCGCG,CTGCACGTGTGTGAGTGTCG	+,-,+,-,-,+	0.00000225,0.00000373,0.0000056,0.00000733,0.00000031,0.00000258
CsBAG8	orange1.1g021785m.g	NAC	1	101-120	TGCCTTGGGTTGCCCGCCAC	-	0.00000225,0.00000373,0.0000056,0.00000733,0.00000031,0.00000258
CsBAG8	orange1.1g021633m.g	Dof	2	1574-1594,1894-1914	TGAAGAGAGAAAAAGGAGAAG，AAACAGGAAAAAAAGCAAAAA	-,-	0.000000943,0.00000179
CsBAG8	orange1.1g021503m.g	MYB	1	1279-1293	CACGTGTTTGGTGAA	+	7.85e-06
CsBAG8	orange1.1g020697m.g	bZIP	2	635-649,638-652	CGATGCCACGTGGCG,AAACGCCACGTGGCA	+,-	0.00000147,0.000000363
CsBAG8	orange1.1g020567m.g	BES1	5	1210-1220，1211-1221，460-470，492-502，493-503	TACACGTGTGG，CACACGTGTAA，CGCACGTGGCA，CACACGTGCAG，TGCACGTGTGT	-,+,-,-,+	0.00000143,0.00000732,0.00000316,0.00000625,	1.1e-06
CsBAG8	orange1.1g020391m.g	ERF	1	1346-1366	CGGAAGCTTTGGCGGCTTTTG	+	3.36e-06
CsBAG8	orange1.1g019960m.g	bHLH	6	414-428,423-437,463-477,486-500,632-646,641-655	CACGTGGGAGCCGTG,CACGTGGGATCTGCG,CACGTGCGAGACAAA,CACGTGCAGATCGCG,CACGTGGCATCGTCG,CACGTGGCGTTTACA	-,+,+,-,-,+	0.00000482,0.00000559,0.00000804,0.00000123,0.00000845,0.00000997
CsBAG8	orange1.1g019668m.g	Dof	3	1387-1407,1576-1596,574-594	CTTTCTTTTATGCTTTTTTTA,TCTCCTTTTTCTCTCTTCATC,CTGTCTTTTTTATTTTTATTT	+,+,-	0.00000784,0.00000715,0.000003
CsBAG8	orange1.1g019570m.g	HD-ZIP	1	1165-1175	CAATCATTGTC	-	5.97e-06
CsBAG8	orange1.1g019485m.g	bHLH	7	413-430,421-438,453-470,461-478,485-502,631-648,639-656	GCACGGCTCCCACGTGGG,GCGCAGATCCCACGTGGG,AGCAGCATGCCACGTGCG,TTTTGTCTCGCACGTGGC,GCGCGATCTGCACGTGTG,TCGACGATGCCACGTGGC,CTGTAAACGCCACGTGGC	+,-,+,-,+,+,-	0.00000633,0.00000918,0.0000032,0.00000664,0.00000913,0.00000225,0.00000517
CsBAG8	orange1.1g019413m.g	Trihelix	1	1033-1043	TCGCCGGAACC	-	0.00000633,0.00000918,0.0000032,0.00000664,0.00000913,0.00000225,0.00000517
CsBAG8	orange1.1g018605m.g	bZIP	3	1077-1086,638-647,640-649	CTACGTGGCA,CCACGTGGCA,CCACGTGGCG	+,-,+	0.00000525,0.000000683,0.00000134
CsBAG8	orange1.1g018495m.g	HSF	1	1030-1040	CTACGTGGCA,CCACGTGGCA,CCACGTGGCG	-	6.14e-06
CsBAG8	orange1.1g018407m.g	WRKY	1	1715-1726	TACGTTGACTCT	+	7.09e-06
CsBAG8	orange1.1g018368m.g	BBR-BPC	6	1578-1598,1771-1791,1773-1793,1775-1795,1777-1797,1779-1799	TCCTTTTTCTCTCTTCATCCC,ATTTTAGACTCTCTCTCTCTC,TTTAGACTCTCTCTCTCTCTC,TAGACTCTCTCTCTCTCTCTC,GACTCTCTCTCTCTCTCTCGT,CTCTCTCTCTCTCTCTCGTGT	+,+,+,+,+,+	0.00000376,0.0000013,0.00000005,0.000000000709,0.0000000106,0.000000373
CsBAG8	orange1.1g017895m.g	WRKY	1	1717-1727	GAGAGTCAACG	-	5.16e-06
CsBAG8	orange1.1g016130m.g	TCP	1	593-605	AGGCGGGACCTAG	+	7.44e-06
CsBAG8	orange1.1g015878m.g	E2F/DP	1	1352-1366	CAAAAGCCGCCAAAG	-	5.41e-06
CsBAG8	orange1.1g014660m.g	bZIP	2	635-649,638-652	CGCCACGTGGCATCG,TGCCACGTGGCGTTT	-,+	0.00000226,0.00000281
CsBAG8	orange1.1g014374m.g	bHLH	6	414-434,417-437,454-474,486-506,632-652,635-655	CACGGCTCCCACGTGGGATCT ,CGCAGATCCCACGTGGGAGCC,GCAGCATGCCACGTGCGAGAC,CGCGATCTGCACGTGTGTGAG,CGACGATGCCACGTGGCGTTT,TGTAAACGCCACGTGGCATCG	+,-,+,+,+,-	0.000000444,0.00000396,0.00000877,0.00000577,0.000000749,0.00000535
CsBAG8	orange1.1g014135m.g	MYB	1	294-308	CATAACCACCCCCCC	+	9.15e-06
CsBAG8	orange1.1g014090m.g	bHLH	2	456-469,640-653	AGCATGCCACGTGC,TAAACGCCACGTGG	+,-	0.00000126,0.00000318
CsBAG8	orange1.1g012387m.g	bHLH	1	419-430,703-714	CCACGTGC	+	2.96e-06
CsBAG8	orange1.1g012287m.g	bZIP	2	419-430,703-714	CTCCCACGTGGG,CCTTGACGTGGT	+,+	0.00000647,0.00000694
CsBAG8	orange1.1g012156m.g	bHLH	8	421-430,421-430,461-470,461-470,53-62,53-62,639-648,639-648	CCCACGTGGG,CCCACGTGGG,GCCACGTGCG,CGCACGTGGC,GTCACGTGCG,CGCACGTGAC,GCCACGTGGC,GCCACGTGGC	+,-,+,-,+,-+,-	0.00000251,0.00000251,0.00000157,0.00000157,0.00000907,0.00000907,0.00000806,0.00000806
CsBAG8	orange1.1g011752m.g	Dof	1	555-573	CCCACGTGGG,CCCACGTGGG,GCCACGTGCG,CGCACGTGGC,GTCACGTGCG,CGCACGTGAC,GCCACGTGGC,GCCACGTGGC	+	8.98e-06
CsBAG8	orange1.1g007797m.g	bHLH	4	422-429,422-429,640-647,640-647	CCACGTGG,CCACGTGG,CCACGTGG,CCACGTGG	+,-,+,-	0.00000849,0.00000849,0.00000849,0.00000849
CsBAG8	orange1.1g006040m.g	bHLH	5	420-429，422-431，460-469，638-647，640-649	TCCCACGTGG，TCCCACGTGG，TGCCACGTGC，TGCCACGTGG，CGCCACGTGG	+,-,+,-,-	0.00000261,0.00000261,0.00000874,0.00000148, 0.00000605
CsBAG8	orange1.1g005715m.g	BES1	8	1207-1221,1210-1224,417-431,420-434,457-471,460-474,489-503,492-506	TTACACGTGTGGAAT,CCACACGTGTAATCA,TCCCACGTGGGAGCC,TCCCACGTGGGATCT,TCGCACGTGGCATGC,TGCCACGTGCGAGAC,ACACACGTGCAGATC,CTGCACGTGTGTGAG	-,+,-,+,-,+,-,+	0.00000335,0.0000015,0.00000393,0.00000639,0.00000433,0.00000474,0.00000608,0.00000689
CsBAG8	orange1.1g002476m.g	CAMTA	1	412-429	CCACGTGGGAGCCGTGCG	-	6.94e-06

## Sheet: Table S6
Table S6 RNA-seq data analysis of CsBAG genes.
Gene name	Transcript	Gene	sample_Rh1 (RPKM)	sample_Rh2 (RPKM)	sample_Dh1 (RPKM)	sample_Dh2 (RPKM)	sample_Rd1 (RPKM)	sample_Rd2 (RPKM)	sample_Dd1 (RPKM)	sample_Dd2 (RPKM)	Rh1/Rd1	Rh2/Rd2	Dh1/Dd1	Dh2/Dd2
BAG1	orange1.1g042130m	orange1.1g042130m.g	7.06346	3.90013	4.75556	4.02894	6.6817	5.10607	5.94319	3.5244	1.05714	0.763822	0.80017	1.14316
BAG2	orange1.1g025281m	orange1.1g025281m.g	13.2741	9.11471	6.04251	5.83036	8.43794	5.27167	8.44421	6.12084	1.57314	1.729	0.71558	0.952542
BAG4.2	orange1.1g043875m	orange1.1g043875m.g	1.3801	1.11783	0.861314	1.01887	1.31745	1.03999	1.61157	1.69319	1.04755	1.07485	0.534456	0.601746
BAG5	orange1.1g022980m	orange1.1g022980m.g	45.8788	28.2262	23.5731	25.5167	57.7753	37.6089	74.7476	47.2077	0.79409	0.750519	0.315369	0.54052
BAG6	orange1.1g046468m	orange1.1g046468m.g	49.7168	29.7011	28.7795	36.1052	42.2016	24.9323	47.0741	27.2868	1.17808	1.19127	0.611366	1.32317
BAG8	orange1.1g018493m	orange1.1g018493m.g	7.28015	5.21583	5.04102	5.42574	7.79739	5.3309	7.8745	5.16422	0.933665	0.978415	0.64017	1.05064

## Sheet: Table S7
Table S7 The collinearity genelink of BAG family genes in Citrus sinensis, Arabidopsis thaliana, Oryza sativa, Malus domestica, Solanum lycopersicum and Carica papaya.
Citrus sinensis	Arabidopsis thaliana
CsBAG4.2	match At-AT5G52060.1.TAIR10
CsBAG5	match At-AT3G51780.1.TAIR10
CsBAG7	match At-AT5G62390 1 .TAIR10
CsBAG8	match At-AT5G52060.1.TAIR10
CsBAG8	match At-AT5G07220 1.TAIR10
CsBAG8	match At-AT5G62100.1 TAIR10
Citrus sinensis	Malus domestica
CsBAG2	match Md-MD05G1277400.v1.1.491
CsBAG2	match Md-MD10G1256300 v1.1.491
CsBAG4.2	match Md-MD01G1196900.v1.1.491
CsBAG4.2	match Md-MD04G1067400.v1.1.491
CsBAG4.2	match Md-MD06G1072800.v1.1.491
CsBAG4.2	match Md-MD07G1264300.v1.1.491
CsBAG5	match Md-MD03G1063900.v1.1.491
CsBAG5	match Md-MD04G1162100v1.1.491
CsBAG5	match Md-MD11G1067400.v1.1.491
CsBAG5	match Md-MD12G1174600.v1.1.491
CsBAG6	match Md-MD13G1123300.v1.1.491
CsBAG6	match Md-MD16G1124100.V1.1.491
CsBAG8	match Md-MD01G1196900.v1.1.491
CsBAG8	match Md-MD04G1067400.v1.1.491
CsBAG8	match Md-MD06G1072800.v1.1.491
CsBAG8	match Md-MD07G1264300.v1.1.491
Citrus sinensis	Oryza sativa
CsBAG4.2	match Os-LOC_Os08g43270.1.MSUv7.0
CsBAG4.2	match Os-LOC_Os09g356301.MSUv7.0
CsBAG5	match Os-LOC_Os01g61500.1.MSUv7.0
CsBAG8	match Os-LOC_Os08g43270.1.MSUV7.0
CsBAG8	match Os-LOC_Os09g35630.1.MSUv7.0
Citrus sinensis	Carica papaya
CsBAG1	match Cp-sunup07G0001770.t1
CsBAG4.2	match Cp-sunup04G0009740.t1
CsBAG4.2	match Cp-sunup09G0000120.t1
CsBAG5	match Cp-sunup02G0021740.t1
CsBAG5	match Cp-sunup08G0009670.t1
CsBAG7	match Cp-sunup09G0004580.t1
CsBAG8	match Cp-sunup09G0000120 t1
Citrus sinensis	Solanum lycopersicum
CsBAG4.2	match Sl-rna-XM_004234308.4
CsBAG4.2	match Sl-rna-XM_010323692.3
CsBAG4.2	match Sl-rna-XM_004245603.4
CsBAG5	match Sl-rna-XM_004240364.4
CsBAG5	match Sl-rna-XM_004249559.4
CsBAG7	match Sl-rna-XM_004234879.4
CsBAG8	match Sl-rna-XM_004234308.4
CsBAG8	match Sl-rna-XM_010323692.3
CsBAG8	match Sl-rna-XM_004245603.4
