# Supplementary material for: Genome-wide identification, Characterization, and Expression Analysis of the CsBAG family in Citrus sinensis (L.) Osbeck
Source: Research Square preprint supplement (doi:10.21203/rs.3.rs-4348725/v1), 2024-05-13
Supplement: Supplementary file 1 [file Figure S3.pdf › FigureS1-7/Figure S3.pdf]

CsBAG4.1 .....  
 CsBAG4.3 .....  
 CsBAG4.2 .....  
 CsBAG8 .....  
 CsBAG2 .....  
 CsBAG5 .....  
 CsBAG3 MAKEKNLSDDQAAVLIQSAYRGFEVRKLEPLKCLKQMVEVRDQAAEIRKRIQALESSDCLKNEKERV  
 CsBAG6 .....  
 CsBAG1 .....  
 CsBAG7 .....

CsBAG4.1 ..... 1 ..... 10 .....  
 CsBAG4.3 ..... MLSLAKSKSSVS  
 CsBAG4.2 ..... MLSLAKSKSSVS  
 CsBAG8 ..... MMRMKTSTKTGSPM  
 CsBAG2 ..... MIKRKSNARGKMHES  
 CsBAG5 ..... MKKNNSK  
 CsBAG3 LIGEMIMRTLLKLDTIQGLHPSLRDIRKALT KDVLTLQEELDSIAIVAEDDISNDAGMQEVQNKVGGI  
 CsBAG6 ..... MDNLLHGRSYRSIPSRGRPRSSYAPSVREIPVQYVGSEEEKQSREP  
 CsBAG1 ..... MQFTHRTVAMTSSR  
 CsBAG7 ..... MRRFRKVELLEPYPPVLVRETSIFPSFVEDEVHDLSSALDFFNPA

20 30 40 50 60 70  
 CsBAG4.1 SRVDMN NNNNPG ELEIRPG GMFVQM RNS ESSN RSS ..... VSVPT IKVRV KFGSTYH EVLIS PQAS  
 CsBAG4.3 SRVDMN NNNNPG ELEIRPG GMFVQM RNS ESSN RSS ..... VSVPT IKVRV KFGSTYH EVLIS PQAS  
 CsBAG4.2 SRVDMN NNNNPG ELEIRPG GMFVQM RNS ESSN RSS ..... VSVPT IKVRV KFGSTYH EVLIS PQAS  
 CsBAG8 ATMNGG SAEAAAH EWE LRP GMLVQKR NPDS DRTS ..... APPPT IRVRV KYGSIYH EIHINSQAT  
 CsBAG2 STTTSS TSTED EIDCE LRP GMLVQKR ..... SEKTD ..... VPAPY LRLRI AF GALRY EISVNSRAT  
 CsBAG5 NDSSNN NNNNEQV DWE MRP GMLVQRR DD DNYD HQD GAAASVSGGPV IRINV ARGPSQY EVHVPARST  
 CsBAG3 LENS LKTNH DN VVDMKEPDEGNLSSMRDLVVNSQGLETSETAL LSDTEVQ GKCEVREL PQRNSMESQVG  
 CsBAG6 SAVKIQKV FRAFLVRKSVKKIKE IRGEVE EIEKRISTGDNIDL IARDSQERLKL NEMLMSSLLFRLDSV  
 CsBAG1 SKFGMF SASSTTTVTYTYHN DHSAPQPTTEIPTPI T..... DHHPQQ LQIQSQAATKIQSA YKSHRIR  
 CsBAG7 LDFFNP SP TPF EIFDS VTD LVRIDQT P S FY SYKRIQRR TAPEL LSVQTL CD RVSLLESRF DRLLSAGVD

80 90 100 110  
 CsBAG4.1 F GELKKML SER TG ..... LHPE EQKLIYK ..... K KERD SKGY LDVAR VRDGS  
 CsBAG4.3 F GELKKML SER TG ..... LHPE EQKLIYK ..... K KERD SKGY LDVAR VRDGS  
 CsBAG4.2 F GELKKML SER TG ..... LHPE EQKLIYK ..... K KERD SKGY LDVAR VRDGS  
 CsBAG8 F GELKKLL TGP TG ..... LHHE DQKLIYK ..... D KERD SKAF LDVVG VKDKS  
 CsBAG2 F GEVKKVLT GET TG ..... LQAG DQVLIYR ..... G KERENGEY LDMCR VKDKS  
 CsBAG5 F GDLKKA ISEK TG ..... LDPQE QKVLF R ..... G KEKE DNEH LDVSGMVKDKS  
 CsBAG3 ESASDM VQVEA TNGGVDVSQAVLTENQGKDI MHPQLQQTSS EELTGAQLQDSFDEPKAMNEARIDGVN  
 CsBAG6 RGVDSGV RDCRKA VIK ..... KAIAL QEF L DAAFSNN SRNDQNGEDENVVEA VDEQN  
 CsBAG1 TLYRK ISSVNSEAN ..... HLQ RVIQR ..... QET VDCIRSDERE  
 CsBAG7 G GDRKYTW TAEIEGGAVDRKYKWTAEIKKGKKKKE E EKKVD KSYKWTAKI KGKD DESRTYTFVASTVD

120 130 140 150  
 CsBAG4.1 KIVLVED I INRER RCL EM LK ..... IAKFQ K ..... DSN SIAQ ICLQ VDKF  
 CsBAG4.3 KIVLVED I INRER RCL EM LK ..... IAKFQ K ..... DSN SIAQ ICLQ VDKF  
 CsBAG4.2 KIVLVED I INRER RCL EM LK ..... IAKFQ K ..... DSN SIAQ ICLQ VDKF  
 CsBAG8 KLV LVED PISQEK RLL EM RK ..... NAKLE K ..... ASK SISEI SLE VDRKL  
 CsBAG2 KVI LTED PASIER RFI EM RR ..... NAKIQS ..... AHRA ISNV SME VDKL  
 CsBAG5 KVL LLEEL TNKEK KPK EVKDSPEKKHEYAKDSEEMRK ..... ALQAI AGVRAE VDKL  
 CsBAG3 GG I HVED NLEAQATELP LILDDEEQPLQELKNSESS RKGKSENV DHEVKLHVL AGS TLPADVDN VDEI  
 CsBAG6 QSAQVECTE ENGER TD AFDEKETVENQNEVGDEETVENQD ..... DDGEAREVVEECDDV  
 CsBAG1 KLRMNEAL MGLLL RLD SVPG ..... IDP SIREARRM VSR  
 CsBAG7 AGE GSKSEK KEKE KKK EK KKKCESATRVVEIEEPAAD H GAVVLR ..... QAF AKRFG SVRNNK GKQKEL

|          | 160                  | 170                              |                    |
|----------|----------------------|----------------------------------|--------------------|
| CsBAG4.1 | AQQVTDLEAIASRGVELTD  |                                  |                    |
| CsBAG4.3 | AQQVTDLEAIASRGVELTD  |                                  |                    |
| CsBAG4.2 | AQQVTDLEAIASRGVELTD  |                                  |                    |
| CsBAG8   | AGQVSALESIITKGGKVAE  |                                  |                    |
| CsBAG2   | VEQVSAIEKSIISNGVKVPE |                                  |                    |
| CsBAG5   | SERVASLEVAVNGGTVPS   |                                  |                    |
| CsBAG3   | GKTARNVDSEINLAELLP   | IGALEEDLSFENKGSETNSETNLVAELPVGVL | EGDLAIENKESEIENLVA |
| CsBAG6   | MPSVSNGPAPPEENVGTSQ  | SESES                            |                    |
| CsBAG1   | IVSLQEILDGICG        |                                  |                    |
| CsBAG7   | SPQDAAMMIQITFRAYL    | IRR                              |                    |

|          | 180                | 190                         | 200                               | 210                        |
|----------|--------------------|-----------------------------|-----------------------------------|----------------------------|
| CsBAG4.1 | DNLDNLI            | GNLMT                       | ELVKLDEIVVEGDLNLQ                 | KRKQVYFWL                  |
| CsBAG4.3 | DNLDNLI            | GNLMT                       | ELVKLDEIVVEGDLNLQ                 | KRKQVYFWL                  |
| CsBAG4.2 | DNLDNLI            | GNLMT                       | ELVKLDEIVVEGDLNLQ                 | KRKQEKRVQ                  |
| CsBAG8   | KDVLNLI            | ELLMNQ                      | LLKLDGIMADGDVKLQ                  | RKMQVRRVQ                  |
| CsBAG2   | VQITTLI            | ELMRQ                       | AIKLD                             | SISAEGDASAKKLQGKRVQ        |
| CsBAG5   | EELDTSAEL          | LMKE                        | LLKLDGIEAEGEAKVQ                  | RKTEVRRVQ                  |
| CsBAG3   | ELPVGVL            | EEGEAKESEIGKDKGSSIGEARYNGVT | NITATKSKVVMVDELSGNAVLEMEENLPLSSIE |                            |
| CsBAG6   | EADSSAN            | PEEDENS                     | SPKQENN                           | AAGAGEVEENVKESGGE          |
| CsBAG1   | SNFDDDFGEWGRYGYWKD | LDKVVEQ                     | MEEEV                             | CRERGGDE                   |
| CsBAG7   | SQALRAL            | RD                          | LA                                | AKTKLKEIRALENNFSYRQIVSRDAE |

|          |                                        |                                |
|----------|----------------------------------------|--------------------------------|
| CsBAG4.1 | SV                                     |                                |
| CsBAG4.3 | SV                                     |                                |
| CsBAG4.2 | SYIETLD...LLKLCNTKLSSKSGEVPLQKQEH      | SYG...KV                       |
| CsBAG8   | KYVETLD...MLKIKNSMPSSNKHHSNGQRLAPIQE   | QPPRHSNGHVLASIQEQQARHSFENLS    |
| CsBAG2   | KCVETLD...LLKIAN                       |                                |
| CsBAG5   | KFHETLD...NLKAINSNP                    |                                |
| CsBAG3   | GKVRSDDEVCKNEGKDGGRIDDDQLPSPESAGISVSPQ | ALEVTNEDVQLQGVDGNKEGRVLEKEQQYG |
| CsBAG6   | GEVEENVQQSGGEGARDENSKNKE               |                                |
| CsBAG1   | MER                                    |                                |
| CsBAG7   | ERQRFSEKIIIVLLLTVD                     | AIEG                           |

|          |                                                      |                              |
|----------|------------------------------------------------------|------------------------------|
| CsBAG4.1 |                                                      |                              |
| CsBAG4.3 |                                                      |                              |
| CsBAG4.2 | TVPLQKQAKQRNLTELKHPFRDSDSFVVTTKWETFD                 |                              |
| CsBAG8   | IQQQYHQQQQQQQQQSTTHSTSGPVVVTTKWETFDSSPGLMQVSSSSTSTFN | PATNNNNNSSGPPKF              |
| CsBAG2   |                                                      | VKVQPVVVTTKWETFDPPPSTVHWEIFD |
| CsBAG5   |                                                      | FCDSSNAIKVVTQWETFD           |
| CsBAG3   | EPESMIDIDSRMDEASGSEITTEDTIAATTTSQMSADERDIVMEENAKLRE  | MEKLMEAGKEQLTVIS             |
| CsBAG6   |                                                      | LLERMMDHGRMMEMMAQLFERNEMQTRL |
| CsBAG1   |                                                      | FCAQHLGFRCLQRFLRD            |
| CsBAG7   |                                                      | ADLMVRAAKRSMVDELEAMLDVVD     |

|          |                                |
|----------|--------------------------------|
| CsBAG4.1 |                                |
| CsBAG4.3 |                                |
| CsBAG4.2 |                                |
| CsBAG8   | PWEFFD                         |
| CsBAG2   |                                |
| CsBAG5   | DWERFD                         |
| CsBAG3   | QLTGRVKDLERKLSRKRKLGRPRRYKRATQ |
| CsBAG6   | DGCETSRDNKKCGKR                |
| CsBAG1   |                                |
| CsBAG7   | DDEKSGNSFEACI                  |
